# Supplementary material for: A consensus-based and readable extension of Li near Co de for R eaction R ules (LiCoRR)
Source: publisher site journal article supplement (doi:10.3762/bjoc.16.215), 2020-10-27
Supplement: Additional file 1 [file Table S6 - Monosaccharide Network.xlsx]

## Sheet: Clusters Reachability
Cluster	Source	Target	Source CID	Target CID	FG	Number FG Changes
1	6dAlt	Alt	12302958	10219674	1 Primary Alcohol	1
1	6dAlt	RhaNAc	12302958	91807222	1 Primary Alcohol,1 Amide	2
1	6dAlt	Dha	12302958	15608515	1 Primary Alcohol,2 Carboxylic Acid	3
1	6dAlt	Sor	12302958	439192	1 Primary Alcohol	1
1	Alt	RhaNAc	10219674	91807222	2 Primary Alcohol,1 Amide	3
1	Alt	Dha	10219674	15608515	2 Primary Alcohol,2 Carboxylic Acid	4
1	RhaNAc	Dha	91807222	15608515	2 Carboxylic Acid,1 Amide	3
1	RhaNAc	Sor	91807222	439192	2 Primary Alcohol,1 Amide	3
1	Dha	Sor	15608515	439192	2 Primary Alcohol,2 Carboxylic Acid	4
2	6dAltNAc	AltN	126961777	6602094	1 Primary Alcohol,1 Primary Amine,1 Amide	3
2	6dAltNAc	Rha	126961777	25310	1 Primary Alcohol,1 Amide	2
2	AltN	Rha	6602094	25310	1 Primary Amine	1
3	6dGul	GalN	12302960	24154	1 Primary Amine	1
3	6dGul	Gul	12302960	441033	1 Primary Alcohol	1
3	6dGul	Par	12302960	12303783	1 Primary Alcohol	1
3	GalN	Gul	24154	441033	1 Primary Alcohol,1 Primary Amine	2
3	GalN	Par	24154	12303783	1 Primary Alcohol,1 Primary Amine	2
3	Gul	Par	441033	12303783	2 Primary Alcohol	2
4	6dTal	Abe	44119431	160540	1 Primary Alcohol	1
4	6dTal	Tal	44119431	441035	1 Primary Alcohol	1
4	6dTal	Tyv	44119431	12303782	1 Primary Alcohol	1
4	6dTal	Man	44119431	18950	1 Primary Alcohol	1
4	Abe	Api	160540	12306753	1 Primary Alcohol	1
4	Abe	Tal	160540	441035	2 Primary Alcohol	2
4	Abe	Man	160540	18950	2 Primary Alcohol	2
4	Api	Tal	12306753	441035	1 Primary Alcohol	1
4	Api	Tyv	12306753	12303782	1 Primary Alcohol	1
4	Api	Man	12306753	18950	1 Primary Alcohol	1
4	Tal	Tyv	441035	12303782	2 Primary Alcohol	2
4	Tal	Man	12303782	18950	2 Primary Alcohol	2
5	6dTalNAc	TalN	126961778	9834117	1 Primary Alcohol,1 Primary Amine,1 Amide	3
8	All	Dig	439507	2723626	2 Primary Alcohol	2
8	All	GlcN	439507	439213	1 Primary Alcohol,1 Primary Amine	2
8	All	IdoN	439507	91864695	1 Primary Alcohol,1 Primary Amine	2
8	All	ManN	439507	440049	1 Primary Alcohol,1 Primary Amine	2
8	All	QuiNAc	439507	11954187	2 Primary Alcohol,1 Amide	3
8	All	Xyl	439507	135191	1 Primary Alcohol	1
8	Dig	GlcN	2723626	439213	1 Primary Alcohol,1 Primary Amine	2
8	Dig	IdoN	2723626	91864695	1 Primary Alcohol,1 Primary Amine	2
8	Dig	ManN	2723626	440049	1 Primary Alcohol,1 Primary Amine	2
8	Dig	QuiNAc	2723626	11954187	1 Amide	1
8	Dig	Xyl	2723626	135191	1 Primary Alcohol	1
8	GlcN	QuiNAc	439213	11954187	1 Primary Alcohol,1 Primary Amine,1 Amide	3
8	GlcN	Xyl	439213	135191	1 Primary Amine	1
8	IdoN	QuiNAc	91864695	11954187	1 Primary Alcohol,1 Primary Amine,1 Amide	3
8	IdoN	Xyl	91864695	135191	1 Primary Amine	1
8	ManN	QuiNAc	440049	11954187	1 Primary Alcohol,1 Primary Amine,1 Amide	3
8	ManN	Xyl	440049	135191	1 Primary Amine	1
8	QuiNAc	Xyl	11954187	135191	1 Primary Alcohol,1 Amide	2
10	AllN	Bac	6915732	54029194	2 Primary Alcohol,1 Primary Amine	3
10	AllN	Glc	6915732	5793	1 Primary Alcohol,1 Primary Amine	2
10	AllN	Ido	6915732	11030410	1 Primary Alcohol,1 Primary Amine	2
10	AllN	Oli	6915732	10888063	1 Primary Alcohol,1 Primary Amine	2
10	AllN	Qui	6915732	439746	1 Primary Amine	1
10	Bac	Glc	54029194	5793	3 Primary Alcohol,2 Primary Amine	5
10	Bac	Ido	54029194	11030410	3 Primary Alcohol,2 Primary Amine	5
10	Bac	Oli	54029194	10888063	1 Primary Alcohol,2 Primary Amine	3
10	Bac	Qui	54029194	439746	2 Primary Alcohol,2 Primary Amine	4
10	Glc	Oli	5793	10888063	2 Primary Alcohol	2
10	Glc	Qui	5793	439746	1 Primary Alcohol	1
10	Ido	Oli	11030410	10888063	2 Primary Alcohol	2
10	Ido	Qui	11030410	439746	1 Primary Alcohol	1
10	Oli	Qui	10888063	439746	1 Primary Alcohol	1
26	Gal	GulN	6036	9920528	1 Primary Alcohol,1 Primary Amine	2
42	Kdn	Kdo	13991616	10857507	1 Primary Alcohol	1
42	Kdn	Neu	13991616	441037	1 Primary Alcohol,1 Primary Amine	2
42	Kdn	Neu5Gc	13991616	440001	1 Amide	1
42	Kdo	Neu	10857507	441037	1 Primary Amine	1
42	Kdo	Neu5Gc	10857507	440001	1 Primary Alcohol,1 Amide	2
42	Neu	Neu5Gc	441037	440001	1 Primary Alcohol,1 Primary Amine,1 Amide	3
46	Lyx	Tag	439240	439312	1 Primary Alcohol	1
51	Mur	MurNAc	441038	5462244	1 Primary Amine,1 Amide	2
51	Mur	MurNGc	441038	91810748	1 Primary Alcohol,1 Primary Amine,1 Amide	3
51	MurNAc	MurNGc	5462244	91810748	1 Primary Alcohol	1
60	Psi	Rib	441036	10975657	1 Primary Alcohol	1
60	Fru	Rib	2723872	10975657	1 Primary Alcohol	1
1	Alt	Sor	10219674	439192		0
4	6dTal	Api	44119431	12306753		0
4	Abe	Tyv	160540	12303782		0
4	Tal	Man	441035	18950		0
8	GlcN	IdoN	439213	91864695		0
8	GlcN	ManN	439213	440049		0
8	IdoN	ManN	91864695	440049		0
10	Glc	Ido	5793	11030410		0
60	Psi	Fru	441036	2723872		0
	1	4eLeg		126961780	1 Primary Alcohol,1 Carboxylic Acid,2 Primary Amine,1 Ether	5
	1	Aci		126961779	1 Primary Alcohol,1 Carboxylic Acid,2 Primary Amine,1 Ether	5
	1	AllA		6602103	1 Carboxylic Acid,1 Ether	2
	1	AllNAc		10944029	1 Amide,1 Ether	2
	1	AltA		56845780	1 Carboxylic Acid,1 Ether	2
	1	AltNAc		44717159	1 Amide,1 Ether	2
	1	Ara		439195	1 Ether	1
	1	Col		12303780	1 Primary Alcohol,1 Ether	2
	1	DDmanHep		53681436	2 Primary Alcohol,1 Ether	3
	1	Fuc		17106	1 Ether	1
	1	FucNAc		91810489	1 Primary Alcohol,1 Amide,1 Ether	3
	1	GalA		439215	1 Carboxylic Acid,1 Ether	2
	1	GalNAc		35717	1 Amide,1 Ether	2
	1	GlcA		94715	1 Carboxylic Acid,1 Ether	2
	1	GlcNAc		439174	1 Amide,1 Ether	2
	1	GulA		11788788	1 Carboxylic Acid,1 Ether	2
	1	GulNAc		13201633	1 Amide,1 Ether	2
	1	IdoA		441039	1 Carboxylic Acid,1 Ether	2
	1	IdoNAc		13201636	1 Amide,1 Ether	2
	1	Leg		70678967	1 Primary Alcohol,1 Carboxylic Acid,2 Primary Amine,1 Ether	5
	1	LDmanHep		21120522	2 Primary Alcohol,1 Ether	3
	1	ManA		439630	1 Carboxylic Acid,1 Ether	2
	1	ManNAc		439281	1 Amide,1 Ether	2
	1	Neu5Ac		439197	1 Primary Alcohol,1 Carboxylic Acid,1 Amide,1 Ether	4
	1	Pse		101137651	1 Primary Alcohol,1 Carboxylic Acid,2 Primary Amine,1 Ether	5
	1	TalA		11298488	1 Carboxylic Acid,1 Ether	2
	1	TalNAc		57376616	1 Amide,1 Ether	2
	2	4eLeg		126961780	1 Carboxylic Acid,2 Primary Amine	3
	2	Aci		126961779	1 Carboxylic Acid,2 Primary Amine	3
	2	AllA		6602103	1 Primary Alcohol,1 Carboxylic Acid	2
	2	AllNAc		10944029	1 Primary Alcohol,1 Amide	2
	2	AltA		56845780	1 Primary Alcohol,1 Carboxylic Acid	2
	2	AltNAc		44717159	1 Primary Alcohol,1 Amide	2
	2	Ara		439195	1 Primary Alcohol	1
	2	DDmanHep		53681436	3 Primary Alcohol	3
	2	Fuc		17106	1 Primary Alcohol	1
	2	FucNAc		91810489	1 Amide	1
	2	GalA		439215	1 Primary Alcohol,1 Carboxylic Acid	2
	2	GalNAc		35717	1 Primary Alcohol,1 Amide	2
	2	GlcA		94715	1 Primary Alcohol,1 Carboxylic Acid	2
	2	GlcNAc		439174	1 Primary Alcohol,1 Amide	2
	2	GulA		11788788	1 Primary Alcohol,1 Carboxylic Acid	2
	2	GulNAc		13201633	1 Primary Alcohol,1 Amide	2
	2	IdoA		441039	1 Primary Alcohol,1 Carboxylic Acid	2
	2	IdoNAc		13201636	1 Primary Alcohol,1 Amide	2
	2	Leg		70678967	1 Carboxylic Acid,2 Primary Amine	3
	2	LDmanHep		21120522	3 Primary Alcohol	3
	2	ManA		439630	1 Primary Alcohol,1 Carboxylic Acid	2
	2	ManNAc		439281	1 Primary Alcohol,1 Amide	2
	2	Neu5Ac		439197	2 Primary Alcohol,1 Carboxylic Acid,1 Amide	4
	2	Pse		101137651	1 Carboxylic Acid,2 Primary Amine	3
	2	TalA		11298488	1 Primary Alcohol,1 Carboxylic Acid	2
	2	TalNAc		57376616	1 Primary Alcohol,1 Amide	2
	3	4eLeg		126961780	1 Primary Alcohol,1 Carboxylic Acid,2 Primary Amine	4
	3	Aci		126961779	1 Primary Alcohol,1 Carboxylic Acid,2 Primary Amine	4
	3	AllA		6602103	2 Primary Alcohol,1 Carboxylic Acid	3
	3	AllNAc		10944029	2 Primary Alcohol,1 Amide	3
	3	AltA		56845780	2 Primary Alcohol,1 Carboxylic Acid	3
	3	AltNAc		44717159	2 Primary Alcohol,1 Amide	3
	3	Ara		439195	2 Primary Alcohol	2
	3	Col		12303780	1 Primary Alcohol	1
	3	DDmanHep		53681436	4 Primary Alcohol	4
	3	Fuc		17106	2 Primary Alcohol	2
	3	FucNAc		91810489	1 Primary Alcohol,1 Amide	2
	3	GalA		439215	2 Primary Alcohol,1 Carboxylic Acid	3
	3	GalNAc		35717	2 Primary Alcohol,1 Amide	3
	3	GlcA		94715	2 Primary Alcohol,1 Carboxylic Acid	3
	3	GlcNAc		439174	2 Primary Alcohol,1 Amide	3
	3	GulA		11788788	2 Primary Alcohol,1 Carboxylic Acid	3
	3	GulNAc		13201633	2 Primary Alcohol,1 Amide	3
	3	IdoA		441039	2 Primary Alcohol,1 Carboxylic Acid	3
	3	IdoNAc		13201636	2 Primary Alcohol,1 Amide	3
	3	Leg		70678967	1 Primary Alcohol,1 Carboxylic Acid,2 Primary Amine	4
	3	LDmanHep		21120522	4 Primary Alcohol	4
	3	ManA		439630	2 Primary Alcohol,1 Carboxylic Acid	3
	3	ManNAc		439281	2 Primary Alcohol,1 Amide	3
	3	Neu5Ac		439197	3 Primary Alcohol,1 Carboxylic Acid,1 Amide	5
	3	Pse		101137651	1 Primary Alcohol,1 Carboxylic Acid,2 Primary Amine	4
	3	TalA		11298488	2 Primary Alcohol,1 Carboxylic Acid	3
	3	TalNAc		57376616	2 Primary Alcohol,1 Amide	3
	4	4eLeg		126961780	1 Carboxylic Acid,2 Primary Amine	3
	4	Aci		126961779	1 Carboxylic Acid,2 Primary Amine	3
	4	AllA		6602103	1 Primary Alcohol,1 Carboxylic Acid	2
	4	AllNAc		10944029	1 Primary Alcohol,1 Amide	2
	4	AltA		56845780	1 Primary Alcohol,1 Carboxylic Acid	2
	4	AltNAc		44717159	1 Primary Alcohol,1 Amide	2
	4	Ara		439195	1 Primary Alcohol	1
	4	DDmanHep		53681436	3 Primary Alcohol	3
	4	Fuc		17106	1 Primary Alcohol	1
	4	FucNAc		91810489	1 Amide	1
	4	GalA		439215	1 Primary Alcohol,1 Carboxylic Acid	2
	4	GalNAc		35717	1 Primary Alcohol,1 Amide	2
	4	GlcA		94715	1 Primary Alcohol,1 Carboxylic Acid	2
	4	GlcNAc		439174	1 Primary Alcohol,1 Amide	2
	4	GulA		11788788	1 Primary Alcohol,1 Carboxylic Acid	2
	4	GulNAc		13201633	1 Primary Alcohol,1 Amide	2
	4	IdoA		441039	1 Primary Alcohol,1 Carboxylic Acid	2
	4	IdoNAc		13201636	1 Primary Alcohol,1 Amide	2
	4	Leg		70678967	1 Carboxylic Acid,2 Primary Amine	3
	4	LDmanHep		21120522	3 Primary Alcohol	3
	4	ManA		439630	1 Primary Alcohol,1 Carboxylic Acid	2
	4	ManNAc		439281	1 Primary Alcohol,1 Amide	2
	4	Neu5Ac		439197	2 Primary Alcohol,1 Carboxylic Acid,1 Amide	4
	4	Pse		101137651	1 Carboxylic Acid,2 Primary Amine	3
	4	TalA		11298488	1 Primary Alcohol,1 Carboxylic Acid	2
	4	TalNAc		57376616	1 Primary Alcohol,1 Amide	2
	5	4eLeg		126961780	1 Carboxylic Acid,1 Primary Amine	2
	5	Aci		126961779	1 Carboxylic Acid,1 Primary Amine	2
	5	AllA		6602103	1 Primary Alcohol,1 Carboxylic Acid,1 Primary Amine	3
	5	AllNAc		10944029	1 Primary Alcohol,1 Primary Amine,1 Amide	3
	5	AltA		56845780	1 Primary Alcohol,1 Carboxylic Acid,1 Primary Amine	3
	5	AltNAc		44717159	1 Primary Alcohol,1 Primary Amine,1 Amide	3
	5	Ara		439195	1 Primary Alcohol,1 Primary Amine	2
	5	Col		12303780	1 Primary Amine	1
	5	DDmanHep		53681436	3 Primary Alcohol,1 Primary Amine	4
	5	Fuc		17106	1 Primary Alcohol,1 Primary Amine	2
	5	FucNAc		91810489	1 Primary Amine,1 Amide	2
	5	GalA		439215	1 Primary Alcohol,1 Carboxylic Acid,1 Primary Amine	3
	5	GalNAc		35717	1 Primary Alcohol,1 Primary Amine,1 Amide	3
	5	GlcA		94715	1 Primary Alcohol,1 Carboxylic Acid,1 Primary Amine	3
	5	GlcNAc		439174	1 Primary Alcohol,1 Primary Amine,1 Amide	3
	5	GulA		11788788	1 Primary Alcohol,1 Carboxylic Acid,1 Primary Amine,	3
	5	GulNAc		13201633	1 Primary Alcohol,1 Primary Amine,1 Amide	3
	5	IdoA		441039	1 Primary Alcohol,1 Carboxylic Acid,1 Primary Amine	3
	5	IdoNAc		13201636	1 Primary Alcohol,1 Primary Amine,1 Amide	3
	5	Leg		70678967	1 Carboxylic Acid,1 Primary Amine	2
	5	LDmanHep		21120522	3 Primary Alcohol,1 Primary Amine	4
	5	ManA		439630	1 Primary Alcohol,1 Carboxylic Acid,1 Primary Amine	3
	5	ManNAc		439281	1 Primary Alcohol,1 Primary Amine,1 Amide	3
	5	Neu5Ac		439197	2 Primary Alcohol,1 Carboxylic Acid,1 Primary Amine,1 Amide	5
	5	Pse		101137651	1 Carboxylic Acid,1 Primary Amine	2
	5	TalA		11298488	1 Primary Alcohol,1 Carboxylic Acid,1 Primary Amine	3
	5	TalNAc		57376616	1 Primary Alcohol,1 Primary Amine,1 Amide	3
	8	4eLeg		126961780	1 Carboxylic Acid,2 Primary Amine	3
	8	Aci		126961779	1 Carboxylic Acid,2 Primary Amine	3
	8	AllA		6602103	1 Primary Alcohol,1 Carboxylic Acid	2
	8	AllNAc		10944029	1 Primary Alcohol,1 Amide	2
	8	AltA		56845780	1 Primary Alcohol,1 Carboxylic Acid	2
	8	AltNAc		44717159	1 Primary Alcohol,1 Amide	2
	8	Ara		439195	1 Primary Alcohol	1
	8	DDmanHep		53681436	3 Primary Alcohol	3
	8	Fuc		17106	1 Primary Alcohol	1
	8	FucNAc		91810489	1 Amide	1
	8	GalA		439215	1 Primary Alcohol,1 Carboxylic Acid	2
	8	GalNAc		35717	1 Primary Alcohol,1 Amide	2
	8	GlcA		94715	1 Primary Alcohol,1 Carboxylic Acid	2
	8	GlcNAc		439174	1 Primary Alcohol,1 Amide	2
	8	GulA		11788788	1 Primary Alcohol,1 Carboxylic Acid	2
	8	GulNAc		13201633	1 Primary Alcohol,1 Amide	2
	8	IdoA		441039	1 Primary Alcohol,1 Carboxylic Acid	2
	8	IdoNAc		13201636	1 Primary Alcohol,1 Amide	2
	8	Leg		70678967	1 Carboxylic Acid,2 Primary Amine	3
	8	LDmanHep		21120522	3 Primary Alcohol	3
	8	ManA		439630	1 Primary Alcohol,1 Carboxylic Acid	2
	8	ManNAc		439281	1 Primary Alcohol,1 Amide	2
	8	Neu5Ac		439197	2 Primary Alcohol,1 Carboxylic Acid,1 Amide	4
	8	Pse		101137651	1 Carboxylic Acid,2 Primary Amine	3
	8	TalA		11298488	1 Primary Alcohol,1 Carboxylic Acid	2
	8	TalNAc		57376616	1 Primary Alcohol,1 Amide	2
	10	4eLeg		126961780	1 Primary Alcohol,1 Carboxylic Acid,2 Primary Amine	4
	10	Aci		126961779	1 Primary Alcohol,1 Carboxylic Acid,2 Primary Amine	4
	10	AllA		6602103	2 Primary Alcohol,1 Carboxylic Acid	3
	10	AllNAc		10944029	2 Primary Alcohol,1 Amide	3
	10	AltA		56845780	2 Primary Alcohol,1 Carboxylic Acid	3
	10	AltNAc		44717159	2 Primary Alcohol,1 Amide	3
	10	Ara		439195	2 Primary Alcohol	2
	10	Col		12303780	1 Primary Alcohol	1
	10	DDmanHep		53681436	4 Primary Alcohol	4
	10	Fuc		17106	2 Primary Alcohol	2
	10	FucNAc		91810489	1 Primary Alcohol,1 Amide	2
	10	GalA		439215	2 Primary Alcohol,1 Carboxylic Acid	3
	10	GalNAc		35717	2 Primary Alcohol,1 Amide	3
	10	GlcA		94715	2 Primary Alcohol,1 Carboxylic Acid	3
	10	GlcNAc		439174	2 Primary Alcohol,1 Amide	3
	10	GulA		11788788	2 Primary Alcohol,1 Carboxylic Acid	3
	10	GulNAc		13201633	2 Primary Alcohol,1 Amide	3
	10	IdoA		441039	2 Primary Alcohol,1 Carboxylic Acid	3
	10	IdoNAc		13201636	2 Primary Alcohol,1 Amide	3
	10	Leg		70678967	1 Primary Alcohol,1 Carboxylic Acid,2 Primary Amine	4
	10	LDmanHep		21120522	4 Primary Alcohol	4
	10	ManA		439630	2 Primary Alcohol,1 Carboxylic Acid	3
	10	ManNAc		439281	2 Primary Alcohol,1 Amide	3
	10	Neu5Ac		439197	3 Primary Alcohol,1 Carboxylic Acid,1 Amide	5
	10	Pse		101137651	1 Primary Alcohol,1 Carboxylic Acid,2 Primary Amine	4
	10	TalA		11298488	2 Primary Alcohol,1 Carboxylic Acid	3
	10	TalNAc		57376616	2 Primary Alcohol,1 Amide	3
	26	4eLeg		126961780	1 Primary Alcohol,1 Carboxylic Acid,2 Primary Amine	4
	26	Aci		126961779	1 Primary Alcohol,1 Carboxylic Acid,2 Primary Amine	4
	26	AllA		6602103	1 Carboxylic Acid	1
	26	AllNAc		10944029	1 Amide	1
	26	AltA		56845780	1 Carboxylic Acid	1
	26	AltNAc		44717159	1 Amide	1
	26	Col		12303780	1 Primary Alcohol	1
	26	DDmanHep		53681436	2 Primary Alcohol	2
	26	FucNAc		91810489	1 Primary Amine,1 Amide	2
	26	GalA		439215	1 Carboxylic Acid	1
	26	GalNAc		35717	1 Amide	1
	26	GlcA		94715	1 Carboxylic Acid	1
	26	GlcNAc		439174	1 Amide	1
	26	GulA		11788788	1 Carboxylic Acid	1
	26	GulNAc		13201633	1 Amide	1
	26	IdoA		441039	1 Carboxylic Acid	1
	26	IdoNAc		13201636	1 Amide	1
	26	Leg		70678967	1 Primary Alcohol,1 Carboxylic Acid,2 Primary Amine	4
	26	LDmanHep		21120522	2 Primary Alcohol	2
	26	ManA		439630	1 Carboxylic Acid	1
	26	ManNAc		439281	1 Amide	1
	26	Neu5Ac		439197	1 Primary Alcohol,1 Carboxylic Acid,1 Amide	3
	26	Pse		101137651	1 Primary Alcohol,1 Carboxylic Acid,2 Primary Amine	4
	26	TalA		11298488	1 Carboxylic Acid	1
	26	TalNAc		57376616	1 Amide	7
	42	4eLeg		126961780	1 Primary Alcohol,2 Primary Amine	3
	42	Aci		126961779	1 Primary Alcohol,2 Primary Amine	3
	42	AllNAc		10944029	1 Carboxylic Acid,1 Amide	2
	42	AltNAc		44717159	1 Carboxylic Acid,1 Amide	2
	42	Ara		439195	1 Carboxylic Acid	1
	42	Col		12303780	1 Primary Alcohol,1 Carboxylic Acid	2
	42	DDmanHep		53681436	2 Primary Alcohol,1 Carboxylic Acid	3
	42	Fuc		17106	1 Carboxylic Acid	1
	42	FucNAc		91810489	1 Primary Alcohol,1 Carboxylic Acid,1 Amide	3
	42	GalNAc		35717	1 Carboxylic Acid,1 Amide	2
	42	GlcNAc		439174	1 Carboxylic Acid,1 Amide	2
	42	GulNAc		13201633	1 Carboxylic Acid,1 Amide	2
	42	IdoNAc		13201636	1 Carboxylic Acid,1 Amide	2
	42	Leg		70678967	1 Primary Alcohol,2 Primary Amine	3
	42	LDmanHep		21120522	2 Primary Alcohol,1 Carboxylic Acid	3
	42	ManNAc		439281	1 Carboxylic Acid,1 Amide	2
	42	Neu5Ac		439197	1 Primary Alcohol,1 Amide	2
	42	Pse		101137651	1 Primary Alcohol,2 Primary Amine	3
	42	TalNAc		57376616	1 Carboxylic Acid,1 Amide	2
	46	4eLeg		126961780	1 Primary Alcohol,1 Carboxylic Acid,2 Primary Amine	4
	46	Aci		126961779	1 Primary Alcohol,1 Carboxylic Acid,2 Primary Amine	4
	46	AllA		6602103	1 Carboxylic Acid	1
	46	AllNAc		10944029	1 Amide	1
	46	AltA		56845780	1 Carboxylic Acid	1
	46	AltNAc		44717159	1 Amide	1
	46	Col		12303780	1 Primary Alcohol	1
	46	DDmanHep		53681436	2 Primary Alcohol	2
	46	FucNAc		91810489	1 Primary Alcohol,1 Amide	2
	46	GalA		439215	1 Carboxylic Acid	1
	46	GalNAc		35717	1 Amide	1
	46	GlcA		94715	1 Carboxylic Acid	1
	46	GlcNAc		439174	1 Amide	1
	46	GulA		11788788	1 Carboxylic Acid	1
	46	GulNAc		13201633	1 Amide	1
	46	IdoA		441039	1 Carboxylic Acid	1
	46	IdoNAc		13201636	1 Amide	1
	46	Leg		70678967	1 Primary Alcohol,1 Carboxylic Acid,2 Primary Amine	4
	46	LDmanHep		21120522	2 Primary Alcohol	2
	46	ManA		439630	1 Carboxylic Acid	1
	46	ManNAc		439281	1 Amide	1
	46	Neu5Ac		439197	1 Primary Alcohol,1 Carboxylic Acid,1 Amide	3
	46	Pse		101137651	1 Primary Alcohol,1 Carboxylic Acid,2 Primary Amine	4
	46	TalA		11298488	1 Carboxylic Acid	1
	46	TalNAc		57376616	1 Amide	1
	51	4eLeg		126961780	1 Primary Amine,1 Ether	2
	51	Aci		126961779	1 Primary Amine,1 Ether	2
	51	AllA		6602103	1 Primary Amine,1 Primary Amine,1 Ether	3
	51	AllNAc		10944029	1 Primary Alcohol,1 Carboxylic Acid,1 Primary Amine,1 Amide,1 Ether	4
	51	AltA		56845780	1 Primary Amine,1 Primary Amine,1 Ether	3
	51	AltNAc		44717159	1 Primary Alcohol,1 Carboxylic Acid,1 Primary Amine,1 Amide,1 Ether	5
	51	Ara		439195	1 Primary Alcohol,1 Carboxylic Acid,1 Primary Amine,1 Ether	4
	51	Col		12303780	1 Carboxylic Acid,1 Primary Amine,1 Ether	3
	51	DDmanHep		53681436	3 Primary Alcohol,1 Carboxylic Acid,1 Primary Amine,1 Ether	6
	51	Fuc		17106	1 Primary Alcohol,1 Carboxylic Acid,1 Primary Amine,1 Ether	4
	51	FucNAc		91810489	1 Carboxylic Acid,1 Primary Amine,1 Amide,1 Ether	4
	51	GalA		439215	1 Primary Amine,1 Primary Amine,1 Ether	3
	51	GalNAc		35717	1 Primary Alcohol,1 Carboxylic Acid,1 Primary Amine,1 Amide,1 Ether	5
	51	GlcA		94715	1 Primary Amine,1 Primary Amine,1 Ether	3
	51	GlcNAc		439174	1 Primary Alcohol,1 Carboxylic Acid,1 Primary Amine,1 Amide,1 Ether	5
	51	GulA		11788788	1 Primary Alcohol,1 Primary Amine,1 Ether	3
	51	GulNAc		13201633	1 Primary Alcohol,1 Carboxylic Acid,1 Primary Amine,1 Amide,1 Ether	5
	51	IdoA		441039	1 Primary Amine,1 Primary Amine,1 Ether	3
	51	IdoNAc		13201636	1 Primary Alcohol,1 Carboxylic Acid,1 Primary Amine,1 Amide,1 Ether	5
	51	Leg		70678967	1 Primary Amine,1 Ether	2
	51	LDmanHep		21120522	3 Primary Alcohol,1 Carboxylic Acid,1 Primary Amine,1 Ether	6
	51	ManA		439630	1 Primary Alcohol,1 Primary Amine,1 Ether	3
	51	ManNAc		439281	1 Primary Alcohol,1 Carboxylic Acid,1 Primary Amine,1 Amide,1 Ether	5
	51	Neu5Ac		439197	2 Primary Alcohol,1 Primary Amine,1 Amide,1 Ether	5
	51	Pse		101137651	1 Primary Amine,1 Ether	2
	51	TalA		11298488	1 Primary Alcohol,1 Primary Amine,1 Ether	3
	51	TalNAc		57376616	1 Primary Alcohol,1 Carboxylic Acid,1 Primary Amine,1 Amide,1 Ether	5
	60	4eLeg		126961780	1 Primary Alcohol,1 Carboxylic Acid,2 Primary Amine	4
	60	Aci		126961779	1 Primary Alcohol,1 Carboxylic Acid,2 Primary Amine	4
	60	AllA		6602103	1 Carboxylic Acid	4
	60	AllNAc		10944029	1 Amide	1
	60	AltA		56845780	1 Carboxylic Acid	1
	60	AltNAc		44717159	1 Amide	1
	60	Col		12303780	1 Primary Alcohol	1
	60	DDmanHep		53681436	2 Primary Alcohol	2
	60	FucNAc		91810489	1 Primary Alcohol,1 Amide	1
	60	GalA		439215	1 Carboxylic Acid	1
	60	GalNAc		35717	1 Amide	1
	60	GlcA		94715	1 Carboxylic Acid	1
	60	GlcNAc		439174	1 Amide	1
	60	GulA		11788788	1 Carboxylic Acid	1
	60	GulNAc		13201633	1 Amide	1
	60	IdoA		441039	1 Carboxylic Acid	1
	60	IdoNAc		13201636	1 Amide	1
	60	Leg		70678967	1 Primary Alcohol,1 Carboxylic Acid,2 Primary Amine	4
	60	LDmanHep		21120522	2 Primary Alcohol	2
	60	ManA		439630	1 Carboxylic Acid	1
	60	ManNAc		439281	1 Amide	1
	60	Neu5Ac		439197	1 Primary Alcohol,1 Carboxylic Acid,1 Amide	3
	60	Pse		101137651	1 Primary Alcohol,1 Carboxylic Acid,2 Primary Amine	4
	60	TalA		11298488	1 Carboxylic Acid	1
	60	TalNAc		57376616	1 Amide	1

## Sheet: All Monosaccharide Reachability
Source	Target	Source_CID	Target_CID	FG	Number_FG_changes
4eLeg	6dAlt	126961780	12302958	1 Primary Alcohol,1 Carboxylic Acid,2 Primary Amine	4
4eLeg	6dAltNAc	126961780	126961777	1 Carboxylic Acid,2 Primary Amine,1 Amide	4
4eLeg	6dGul	126961780	12302960	1 Primary Alcohol,1 Carboxylic Acid,2 Primary Amine	4
4eLeg	6dTal	126961780	44119431	1 Primary Alcohol,1 Carboxylic Acid,2 Primary Amine	4
4eLeg	6dTalNAc	126961780	126961778	1 Carboxylic Acid,2 Primary Amine,1 Amide	4
4eLeg	Abe	126961780	160540	1 Carboxylic Acid,2 Primary Amine	3
4eLeg	Aci	126961780	126961779		0
4eLeg	All	126961780	439507	2 Primary Alcohol, 1 Carboxylic Acid,2 Primary Amine	5
4eLeg	AllA	126961780	6602103	1 Primary Alcohol,2 Primary Amine	3
4eLeg	AllN	126961780	6915732	1 Primary Alcohol,1 Carboxylic Acid,1 Primary Amine	3
4eLeg	AllNAc	126961780	10944029	1 Primary Alcohol,1 Carboxylic Acid,2 Primary Amine,1 Amide	5
4eLeg	Alt	126961780	10219674	2 Primary Alcohol,1 Carboxylic Acid,2 Primary Amine	5
4eLeg	AltA	126961780	56845780	1 Primary Alcohol,2 Primary Amine	3
4eLeg	AltN	126961780	6602094	1 Primary Alcohol,1 Carboxylic Acid,1 Primary Amine	3
4eLeg	AltNAc	126961780	44717159	1 Primary Alcohol,1 Carboxylic Acid,2 Primary Amine,1 Amide	5
4eLeg	Api	126961780	12306753	1 Primary Alcohol,1 Carboxylic Acid,2 Primary Amine	4
4eLeg	Ara	126961780	439195	1 Primary Alcohol,1 Carboxylic Acid,2 Primary Amine	4
4eLeg	Bac	126961780	54029194	1 Primary Alcohol,1 Carboxylic Acid	2
4eLeg	Col	126961780	12303780	1 Carboxylic Acid,2 Primary Amine	3
4eLeg	DDmanHep	126961780	53681436	3 Primary Alcohol,1 Carboxylic Acid,2 Primary Amine	6
4eLeg	Dha	126961780	15608515	1 Carboxylic Acid,2 Primary Amine	3
4eLeg	Dig	126961780	2723626	1 Carboxylic Acid,2 Primary Amine	3
4eLeg	Fru	126961780	2723872	2 Primary Alcohol,1 Carboxylic Acid,2 Primary Amine	5
4eLeg	Fuc	126961780	17106	1 Primary Alcohol,1 Carboxylic Acid,2 Primary Amine	4
4eLeg	FucNAc	126961780	91810489	1 Carboxylic Acid,2 Primary Amine,1 Amide	4
4eLeg	Gal	126961780	6036	2 Primary Alcohol,1 Carboxylic Acid,2 Primary Amine	5
4eLeg	GalA	126961780	439215	1 Primary Alcohol,2 Primary Amine	3
4eLeg	GalN	126961780	24154	1 Primary Alcohol,1 Carboxylic Acid,1 Primary Amine	3
4eLeg	GalNAc	126961780	35717	1 Primary Alcohol,1 Carboxylic Acid,2 Primary Amine,1 Amide	5
4eLeg	Glc	126961780	5793	2 Primary Alcohol,1 Carboxylic Acid,2 Primary Amine	5
4eLeg	GlcA	126961780	94715	1 Primary Alcohol,2 Primary Amine	3
4eLeg	GlcN	126961780	439213	1 Primary Alcohol,1 Carboxylic Acid,1 Primary Amine	3
4eLeg	GlcNAc	126961780	439174	1 Primary Alcohol,1 Carboxylic Acid,2 Primary Amine,1 Amide	5
4eLeg	Gul	126961780	441033	2 Primary Alcohol,1 Carboxylic Acid,2 Primary Amine	5
4eLeg	GulA	126961780	11788788	1 Primary Alcohol,2 Primary Amine	3
4eLeg	GulN	126961780	9920528	1 Primary Alcohol,1 Carboxylic Acid,1 Primary Amine	3
4eLeg	GulNAc	126961780	13201633	1 Primary Alcohol,1 Carboxylic Acid,2 Primary Amine,1 Amide	5
4eLeg	Ido	126961780	11030410	2 Primary Alcohol,1 Carboxylic Acid,2 Primary Amine	5
4eLeg	IdoA	126961780	441039	1 Primary Alcohol,2 Primary Amine	3
4eLeg	IdoN	126961780	91864695	1 Primary Alcohol,1 Carboxylic Acid,1 Primary Amine	3
4eLeg	IdoNAc	126961780	13201636	1 Primary Alcohol,1 Carboxylic Acid,2 Primary Amine,1 Amide	5
4eLeg	Kdn	126961780	13991616	3 Primary Alcohol,2 Primary Amine	5
4eLeg	Kdo	126961780	10857507	2 Primary Alcohol,2 Primary Amine	4
4eLeg	Leg	126961780	70678967		0
4eLeg	LDmanHep	126961780	21120522	3 Primary Alcohol,1 Carboxylic Acid,2 Primary Amine	6
4eLeg	Lyx	126961780	439240	1 Primary Alcohol,1 Carboxylic Acid,2 Primary Amine	4
4eLeg	Man	126961780	18950	2 Primary Alcohol,1 Carboxylic Acid,2 Primary Amine	5
4eLeg	ManA	126961780	439630	1 Primary Alcohol,2 Primary Amine	3
4eLeg	ManN	126961780	440049	1 Primary Alcohol,1 Carboxylic Acid,1 Primary Amine	3
4eLeg	ManNAc	126961780	439281	1 Primary Alcohol,1 Carboxylic Acid,2 Primary Amine,1 Amide	5
4eLeg	Mur	126961780	441038	1 Primary Amine,1 Ether	2
4eLeg	MurNAc	126961780	5462244	1 Amide,2 Primary Amine, 1 Amide,1 Ether	5
4eLeg	MurNGc	126961780	91810748	1 Primary Alcohol,2 Primary Amine, 1 Amide,1 Ether	5
4eLeg	Neu	126961780	441037	2 Primary Alcohol,1 Primary Amine	3
4eLeg	Neu5Ac	126961780	439197	2 Primary Alcohol,2 Primary Amide,1 Amide	5
4eLeg	Neu5Gc	126961780	440001	3 Primary Alcohol,2 Primary Amine,1 Amide	6
4eLeg	Oli	126961780	10888063	1 Carboxylic Acid,2 Primary Amine	3
4eLeg	Par	126961780	12303783	1 Carboxylic Acid,2 Primary Amine	3
4eLeg	Pse	126961780	101137651		0
4eLeg	Psi	126961780	441036	2 Primary Alcohol,1 Carboxylic Acid,2 Primary Amine	5
4eLeg	Qui	126961780	439746	1 Primary Alcohol,1 Carboxylic Acid,2 Primary Amine	4
4eLeg	QuiNAc	126961780	11954187	1 Carboxylic Acid,2 Primary Amine,1 Amide	4
4eLeg	Rha	126961780	25310	1 Primary Alcohol,1 Carboxylic Acid,2 Primary Amine	4
4eLeg	RhaNAc	126961780	91807222	1 Carboxylic Acid,2 Primary Amine,1 Amide	4
4eLeg	Rib	126961780	10975657	1 Primary Alcohol,1 Carboxylic Acid,2 Primary Amine	4
4eLeg	Sor	126961780	439192	2 Primary Alcohol,1 Carboxylic Acid,2 Primary Amine	5
4eLeg	Tag	126961780	439312	2 Primary Alcohol,1 Carboxylic Acid,2 Primary Amine	5
4eLeg	Tal	126961780	441035	2 Primary Alcohol,1 Carboxylic Acid,2 Primary Amine	5
4eLeg	TalA	126961780	11298488	1 Primary Alcohol,2 Primary Amine	3
4eLeg	TalN	126961780	9834117	1 Primary Alcohol,1 Carboxylic Acid,1 Primary Amine	3
4eLeg	TalNAc	126961780	57376616	1 Primary Alcohol,1 Carboxylic Acid,2 Primary Amine,1 Amide	5
4eLeg	Tyv	126961780	12303782	1 Carboxylic Acid,2 Primary Amine	3
4eLeg	Xyl	126961780	135191	1 Primary Alcohol,1 Carboxylic Acid,2 Primary Amine	4
6dAlt	6dAltNAc	12302958	126961777	1 Primary Alcohol,1 Amide	2
6dAlt	6dGul	12302958	12302960		0
6dAlt	6dTal	12302958	44119431		0
6dAlt	6dTalNAc	12302958	126961778	1 Primary Alcohol,1 Amide	2
6dAlt	Abe	12302958	160540	1 Primary Alcohol	1
6dAlt	Aci	12302958	126961779	1 Primary Alcohol,1 Carboxylic Acid,2 Primary Amine	4
6dAlt	All	12302958	439507	1 Primary Alcohol	1
6dAlt	AllA	12302958	6602103	1 Carboxylic Acid	1
6dAlt	AllN	12302958	6915732	1 Primary Amine	1
6dAlt	AllNAc	12302958	10944029	1 Primary Alcohol,2 Primary Amine,1 Amide	4
6dAlt	Alt	12302958	10219674	1 Primary Alcohol	1
6dAlt	AltA	12302958	56845780	1 Carboxylic Acid	1
6dAlt	AltN	12302958	6602094	1 Primary Amine	1
6dAlt	AltNAc	12302958	44717159	1 Amide	1
6dAlt	Api	12302958	12306753		0
6dAlt	Ara	12302958	439195		0
6dAlt	Bac	12302958	54029194	2 Primary Alcohol,2 Primary Amine	4
6dAlt	Col	12302958	12303780	1 Primary Alcohol	1
6dAlt	DDmanHep	12302958	53681436	2 Primary Alcohol	2
6dAlt	Dha	12302958	15608515	1 Primary Alcohol,2 Carboxylic Acid	3
6dAlt	Dig	12302958	2723626	1 Primary Alcohol	1
6dAlt	Fru	12302958	2723872	1 Primary Alcohol	1
6dAlt	Fuc	12302958	17106		0
6dAlt	FucNAc	12302958	91810489	1 Primary Alcohol,1 Amide	2
6dAlt	Gal	12302958	6036	1 Primary Alcohol	1
6dAlt	GalA	12302958	439215	1 Carboxylic Acid	1
6dAlt	GalN	12302958	24154	1 Primary Amine	1
6dAlt	GalNAc	12302958	35717	1 Amide	1
6dAlt	Glc	12302958	5793	1 Primary Alcohol	1
6dAlt	GlcA	12302958	94715	1 Carboxylic Acid	1
6dAlt	GlcN	12302958	439213	1 Primary Amine	1
6dAlt	GlcNAc	12302958	439174	1 Amide	1
6dAlt	Gul	12302958	441033	1 Primary Alcohol	1
6dAlt	GulA	12302958	11788788	1 Carboxylic Acid	1
6dAlt	GulN	12302958	9920528	1 Primary Amine	1
6dAlt	GulNAc	12302958	13201633	1 Amide	1
6dAlt	Ido	12302958	11030410	1 Primary Alcohol	1
6dAlt	IdoA	12302958	441039	1 Carboxylic Acid	1
6dAlt	IdoN	12302958	91864695	1 Primary Amine	1
6dAlt	IdoNAc	12302958	13201636	1 Amide	1
6dAlt	Kdn	12302958	13991616	2 Primary Alcohol,1 Carboxylic Acid	3
6dAlt	Kdo	12302958	10857507	2 Primary Alcohol,1 Carboxylic Acid	3
6dAlt	Leg	12302958	70678967	1 Primary Alcohol,1 Carboxylic Acid,2 Primary Amine	4
6dAlt	LDmanHep	12302958	21120522	2 Primary Alcohol	2
6dAlt	Lyx	12302958	439240		0
6dAlt	Man	12302958	18950	1 Primary Alcohol	1
6dAlt	ManA	12302958	439630	1 Carboxylic Acid	1
6dAlt	ManN	12302958	440049	1 Primary Amine	1
6dAlt	ManNAc	12302958	439281	1 Amide	1
6dAlt	Mur	12302958	441038	1 Primary Alcohol,1 Carboxylic Acid,1 Primary Amine,1 Ether	4
6dAlt	MurNAc	12302958	5462244	1 Primary Alcohol,1 Carboxylic Acid,1 Amide,1 Ether	4
6dAlt	MurNGc	12302958	91810748	1 Carboxylic Acid,1 Amide,1 Ether	3
6dAlt	Neu	12302958	441037	1 Primary Alcohol,1 Carboxylic Acid,1 Primary Amine	3
6dAlt	Neu5Ac	12302958	439197	1 Primary Alcohol,1 Carboxylic Acid,1 Amide	3
6dAlt	Neu5Gc	12302958	440001	2 Primary Alcohol,1 Carboxylic Acid,1 Amide	4
6dAlt	Oli	12302958	10888063	1 Primary Alcohol	1
6dAlt	Par	12302958	12303783	1 Primary Alcohol	1
6dAlt	Pse	12302958	101137651	1 Primary Alcohol,1 Carboxylic Acid,2 Primary Amine	4
6dAlt	Psi	12302958	441036	1 Primary Alcohol	1
6dAlt	Qui	12302958	439746		0
6dAlt	QuiNAc	12302958	11954187	1 Primary Amine,1 Amide	2
6dAlt	Rha	12302958	25310		0
6dAlt	RhaNAc	12302958	91807222	1 Primary Alcohol,1 Amide	2
6dAlt	Rib	12302958	10975657		0
6dAlt	Sor	12302958	439192	1 Primary Alcohol	1
6dAlt	Tag	12302958	439312	1 Primary Alcohol	1
6dAlt	Tal	12302958	441035	1 Primary Alcohol	1
6dAlt	TalA	12302958	11298488	1 Carboxylic Acid	1
6dAlt	TalN	12302958	9834117	1 Primary Amine	1
6dAlt	TalNAc	12302958	57376616	1 Amide	1
6dAlt	Tyv	12302958	12303782	1 Primary Alcohol	1
6dAlt	Xyl	12302958	135191		0
6dAltNAc	6dGul	126961777	12302960	1 Primary Alcohol,1 Amide	2
6dAltNAc	6dTal	126961777	44119431	1 Primary Alcohol,1 Amide	2
6dAltNAc	6dTalNAc	126961777	126961778		0
6dAltNAc	Abe	126961777	160540	1 Amide	1
6dAltNAc	Aci	126961777	126961779	1 Carboxylic Acid,2 Primary Amine,1 Amide	4
6dAltNAc	All	126961777	439507	2 Primary Alcohol,1 Amide	3
6dAltNAc	AllA	126961777	6602103	1 Primary Alcohol,1 Carboxylic Acid,1 Amide	3
6dAltNAc	AllN	126961777	6915732	1 Primary Alcohol,1 Primary Amine,1 Amide	3
6dAltNAc	AllNAc	126961777	10944029	1 Primary Alcohol	1
6dAltNAc	Alt	126961777	10219674	2 Primary Alcohol,1 Amide	3
6dAltNAc	AltA	126961777	56845780	1 Primary Alcohol,1 Carboxylic Acid,1 Amide	3
6dAltNAc	AltN	126961777	6602094	1 Primary Alcohol,1 Primary Amine,1 Amide	3
6dAltNAc	AltNAc	126961777	44717159	1 Primary Alcohol	1
6dAltNAc	Api	126961777	12306753	1 Primary Alcohol,1 Amide	2
6dAltNAc	Ara	126961777	439195	1 Primary Alcohol,1 Amide	2
6dAltNAc	Bac	126961777	54029194	1 Primary Alcohol,2 Primary Amine,1 Amide	3
6dAltNAc	Col	126961777	12303780	1 Amide	1
6dAltNAc	DDmanHep	126961777	53681436	3 Primary Alcohol,1 Amide	4
6dAltNAc	Dha	126961777	15608515	2 Carboxylic Acid,1 Amide	3
6dAltNAc	Dig	126961777	2723626	1 Amide	1
6dAltNAc	Fru	126961777	2723872	2 Primary Alcohol,1 Amide	3
6dAltNAc	Fuc	126961777	17106	1 Primary Alcohol,1 Amide	2
6dAltNAc	FucNAc	126961777	91810489		0
6dAltNAc	Gal	126961777	6036	2 Primary Alcohol,1 Amide	3
6dAltNAc	GalA	126961777	439215	1 Primary Alcohol,1 Carboxylic Acid,1 Amide	3
6dAltNAc	GalN	126961777	24154	1 Primary Alcohol,1 Primary Amine,1 Amide	3
6dAltNAc	GalNAc	126961777	35717	1 Primary Alcohol	1
6dAltNAc	Glc	126961777	5793	2 Primary Alcohol,1 Amide	3
6dAltNAc	GlcA	126961777	94715	1 Primary Alcohol,1 Carboxylic Acid,1 Amide	3
6dAltNAc	GlcN	126961777	439213	1 Primary Alcohol,1 Primary Amine,1 Amide	3
6dAltNAc	GlcNAc	126961777	439174	1 Primary Alcohol	1
6dAltNAc	Gul	126961777	441033	2 Primary Alcohol,1 Amide	3
6dAltNAc	GulA	126961777	11788788	1 Primary Alcohol,1 Carboxylic Acid,1 Amide	3
6dAltNAc	GulN	126961777	9920528	1 Primary Alcohol,1 Primary Amine,1 Amide	3
6dAltNAc	GulNAc	126961777	13201633	1 Primary Alcohol	1
6dAltNAc	Ido	126961777	11030410	2 Primary Alcohol,1 Amide	3
6dAltNAc	IdoA	126961777	441039	1 Primary Alcohol,1 Carboxylic Acid,1 Amide	3
6dAltNAc	IdoN	126961777	91864695	1 Primary Alcohol,1 Primary Amine,1 Amide	3
6dAltNAc	IdoNAc	126961777	13201636	1 Primary Alcohol	1
6dAltNAc	Kdn	126961777	13991616	3 Primary Alcohol,1 Carboxylic Acid,1 Amide	5
6dAltNAc	Kdo	126961777	10857507	2 Primary Alcohol,1 Carboxylic Acid,1 Amide	4
6dAltNAc	Leg	126961777	70678967	1 Carboxylic Acid,2 Primary Amine,1 Amide	4
6dAltNAc	LDmanHep	126961777	21120522	3 Primary Alcohol,1 Amide	4
6dAltNAc	Lyx	126961777	439240	1 Primary Alcohol,1 Amide	2
6dAltNAc	Man	126961777	18950	2 Primary Alcohol,1 Amide	3
6dAltNAc	ManA	126961777	439630	1 Primary Alcohol,1 Carboxylic Acid,1 Amide	3
6dAltNAc	ManN	126961777	440049	1 Primary Alcohol,1 Primary Amine,1 Amide	3
6dAltNAc	ManNAc	126961777	439281	1 Primary Alcohol	1
6dAltNAc	Mur	126961777	441038	1 Carboxylic Acid,1 Primary Amine,1 Amide,1 Ether	4
6dAltNAc	MurNAc	126961777	5462244	1 Carboxylic Acid,1 Ether	2
6dAltNAc	MurNGc	126961777	91810748	1 Primary Alcohol,1 Carboxylic Acid,1 Ether	3
6dAltNAc	Neu	126961777	441037	2 Primary Alcohol,1 Carboxylic Acid,1 Primary Amine,1 Amide	5
6dAltNAc	Neu5Ac	126961777	439197	2 Primary Alcohol,1 Carboxylic Acid	3
6dAltNAc	Neu5Gc	126961777	440001	3 Primary Alcohol,1 Carboxylic Acid	4
6dAltNAc	Oli	126961777	10888063	1 Amide	1
6dAltNAc	Par	126961777	12303783	1 Amide	1
6dAltNAc	Pse	126961777	101137651	1 Carboxylic Acid,2 Primary Amine,1 Amide	4
6dAltNAc	Psi	126961777	441036	2 Primary Alcohol,1 Amide	3
6dAltNAc	Qui	126961777	439746	1 Primary Alcohol,1 Amide	2
6dAltNAc	QuiNAc	126961777	11954187		0
6dAltNAc	Rha	126961777	25310	1 Primary Alcohol,1 Amide	2
6dAltNAc	RhaNAc	126961777	91807222		0
6dAltNAc	Rib	126961777	10975657	1 Primary Alcohol,1 Amide	2
6dAltNAc	Sor	126961777	439192	2 Primary Alcohol,1 Amide	3
6dAltNAc	Tag	126961777	439312	2 Primary Alcohol,1 Amide	3
6dAltNAc	Tal	126961777	441035	2 Primary Alcohol,1 Amide	3
6dAltNAc	TalA	126961777	11298488	1 Primary Alcohol,1 Carboxylic Acid,1 Amide	3
6dAltNAc	TalN	126961777	9834117	1 Primary Alcohol,1 Primary Amine,1 Amide	3
6dAltNAc	TalNAc	126961777	57376616	1 Primary Alcohol	1
6dAltNAc	Tyv	126961777	12303782	1 Amide	1
6dAltNAc	Xyl	126961777	135191	1 Primary Alcohol,1 Amide	2
6dGul	6dTal	12302960	44119431		0
6dGul	6dTalNAc	12302960	126961778	1 Primary Alcohol,1 Amide	2
6dGul	Abe	12302960	160540	1 Primary Alcohol	1
6dGul	Aci	12302960	126961779	1 Primary Alcohol,1 Carboxylic Acid,2 Primary Amine	4
6dGul	All	12302960	439507	1 Primary Alcohol	1
6dGul	AllA	12302960	6602103	1 Carboxylic Acid	1
6dGul	AllN	12302960	6915732	1 Primary Amine	1
6dGul	AllNAc	12302960	10944029	1 Amide	1
6dGul	Alt	12302960	10219674	1 Primary Alcohol	1
6dGul	AltA	12302960	56845780	1 Carboxylic Acid	1
6dGul	AltN	12302960	6602094	1 Primary Amine	1
6dGul	AltNAc	12302960	44717159	1 Amide	1
6dGul	Api	12302960	12306753		0
6dGul	Ara	12302960	439195		0
6dGul	Bac	12302960	54029194	2 Primary Alcohol,2 Primary Amine	4
6dGul	Col	12302960	12303780	1 Primary Alcohol	1
6dGul	DDmanHep	12302960	53681436	2 Primary Alcohol	2
6dGul	Dha	12302960	15608515	1 Primary Alcohol,2 Carboxylic Acid	3
6dGul	Dig	12302960	2723626	1 Primary Alcohol	1
6dGul	Fru	12302960	2723872	1 Primary Alcohol	1
6dGul	Fuc	12302960	17106		0
6dGul	FucNAc	12302960	91810489	1 Primary Alcohol,1 Amide	2
6dGul	Gal	12302960	6036	1 Primary Alcohol	1
6dGul	GalA	12302960	439215	1 Carboxylic Acid	1
6dGul	GalN	12302960	24154	1 Primary Amine	1
6dGul	GalNAc	12302960	35717	1 Amide	1
6dGul	Glc	12302960	5793	1 Primary Alcohol	1
6dGul	GlcA	12302960	94715	1 Carboxylic Acid	1
6dGul	GlcN	12302960	439213	1 Primary Amine	1
6dGul	GlcNAc	12302960	439174	1 Amide	1
6dGul	Gul	12302960	441033	1 Primary Alcohol	1
6dGul	GulA	12302960	11788788	1 Carboxylic Acid	1
6dGul	GulN	12302960	9920528	1 Primary Amine	1
6dGul	GulNAc	12302960	13201633	1 Amide	1
6dGul	Ido	12302960	11030410	1 Primary Alcohol	1
6dGul	IdoA	12302960	441039	1 Carboxylic Acid	1
6dGul	IdoN	12302960	91864695	1 Primary Amine	1
6dGul	IdoNAc	12302960	13201636	1 Amide	1
6dGul	Kdn	12302960	13991616	2 Primary Alcohol,1 Carboxylic Acid	3
6dGul	Kdo	12302960	10857507	1 Primary Alcohol,1 Carboxylic Acid	4
6dGul	Leg	12302960	70678967	1 Primary Alcohol,1 Carboxylic Acid,2 Primary Amine	4
6dGul	LDmanHep	12302960	21120522	2 Primary Alcohol	2
6dGul	Lyx	12302960	439240		0
6dGul	Man	12302960	18950	1 Primary Alcohol	1
6dGul	ManA	12302960	439630	1 Carboxylic Acid	1
6dGul	ManN	12302960	440049	1 Primary Amine	1
6dGul	ManNAc	12302960	439281	1 Amide	1
6dGul	Mur	12302960	441038	1 Primary Alcohol,1 Carboxylic Acid,1 Primary Amine,1 Ether	4
6dGul	MurNAc	12302960	5462244	1 Primary Alcohol,1 Carboxylic Acid,1 Amide,1 Ether	4
6dGul	MurNGc	12302960	91810748	1 Carboxylic Acid,1 Amide,1 Ether	3
6dGul	Neu	12302960	441037	1 Primary Alcohol,1 Carboxylic Acid,1 Primary Amine	3
6dGul	Neu5Ac	12302960	439197	1 Primary Alcohol,1 Carboxylic Acid,1 Amide	3
6dGul	Neu5Gc	12302960	440001	2 Primary Alcohol,1 Carboxylic Acid,1 Amide	4
6dGul	Oli	12302960	10888063	1 Primary Alcohol	1
6dGul	Par	12302960	12303783	1 Primary Alcohol	1
6dGul	Pse	12302960	101137651	1 Primary Alcohol,1 Carboxylic Acid,2 Primary Amine	4
6dGul	Psi	12302960	441036	1 Primary Alcohol	1
6dGul	Qui	12302960	439746		0
6dGul	QuiNAc	12302960	11954187	1 Primary Alcohol,1 Amide	2
6dGul	Rha	12302960	25310		0
6dGul	RhaNAc	12302960	91807222	1 Primary Alcohol,1 Amide	2
6dGul	Rib	12302960	10975657		0
6dGul	Sor	12302960	439192	1 Primary Alcohol	1
6dGul	Tag	12302960	439312	1 Primary Alcohol	1
6dGul	Tal	12302960	441035	1 Primary Alcohol	1
6dGul	TalA	12302960	11298488	1 Carboxylic Acid	1
6dGul	TalN	12302960	9834117	1 Primary Amine	1
6dGul	TalNAc	12302960	57376616	1 Amide	1
6dGul	Tyv	12302960	12303782	1 Primary Alcohol	1
6dGul	Xyl	12302960	135191		0
6dTal	6dTalNAc	44119431	126961778	1 Primary Alcohol,1 Amide	2
6dTal	Abe	44119431	160540	1 Primary Alcohol	1
6dTal	Aci	44119431	126961779	1 Primary Alcohol,1 Carboxylic Acid,2 Primary Amine	4
6dTal	All	44119431	439507	1 Primary Alcohol	1
6dTal	AllA	44119431	6602103	1 Carboxylic Acid	1
6dTal	AllN	44119431	6915732	1 Primary Amine	1
6dTal	AllNAc	44119431	10944029	1 Amide	1
6dTal	Alt	44119431	10219674	1 Primary Alcohol	1
6dTal	AltA	44119431	56845780	1 Carboxylic Acid	1
6dTal	AltN	44119431	6602094	1 Primary Amine	1
6dTal	AltNAc	44119431	44717159	1 Amide	1
6dTal	Api	44119431	12306753		0
6dTal	Ara	44119431	439195		0
6dTal	Bac	44119431	54029194	2 Primary Alcohol,2 Primary Amine	4
6dTal	Col	44119431	12303780	1 Primary Alcohol	1
6dTal	DDmanHep	44119431	53681436	2 Primary Alcohol	2
6dTal	Dha	44119431	15608515	1 Primary Alcohol,2 Carboxylic Acid	3
6dTal	Dig	44119431	2723626	1 Primary Alcohol	1
6dTal	Fru	44119431	2723872	1 Primary Alcohol	1
6dTal	Fuc	44119431	17106		0
6dTal	FucNAc	44119431	91810489	1 Primary Alcohol,1 Amide	2
6dTal	Gal	44119431	6036	1 Primary Alcohol	1
6dTal	GalA	44119431	439215	1 Carboxylic Acid	1
6dTal	GalN	44119431	24154	1 Primary Amine	1
6dTal	GalNAc	44119431	35717	1 Amide	1
6dTal	Glc	44119431	5793	1 Primary Alcohol	1
6dTal	GlcA	44119431	94715	1 Carboxylic Acid	1
6dTal	GlcN	44119431	439213	1 Primary Amine	1
6dTal	GlcNAc	44119431	439174	1 Amide	1
6dTal	Gul	44119431	441033	1 Primary Alcohol	1
6dTal	GulA	44119431	11788788	1 Carboxylic Acid	1
6dTal	GulN	44119431	9920528	1 Primary Amine	1
6dTal	GulNAc	44119431	13201633	1 Amide	1
6dTal	Ido	44119431	11030410	1 Primary Alcohol	1
6dTal	IdoA	44119431	441039	1 Carboxylic Acid	1
6dTal	IdoN	44119431	91864695	1 Primary Amine	1
6dTal	IdoNAc	44119431	13201636	1 Amide	1
6dTal	Kdn	44119431	13991616	2 Primary Alcohol,1 Carboxylic Acid	3
6dTal	Kdo	44119431	10857507	1 Primary Alcohol,1 Carboxylic Acid	2
6dTal	Leg	44119431	70678967	1 Primary Alcohol,1 Carboxylic Acid,2 Primary Amine	4
6dTal	LDmanHep	44119431	21120522	2 Primary Alcohol	2
6dTal	Lyx	44119431	439240		0
6dTal	Man	44119431	18950	1 Primary Alcohol	1
6dTal	ManA	44119431	439630	1 Carboxylic Acid	1
6dTal	ManN	44119431	440049	1 Primary Amine	1
6dTal	ManNAc	44119431	439281	1 Amide	1
6dTal	Mur	44119431	441038	1 Primary Alcohol,1 Carboxylic Acid,1 Primary Amine,1 Ether	4
6dTal	MurNAc	44119431	5462244	1 Primary Alcohol,1 Carboxylic Acid,1 Amide,1 Ether	4
6dTal	MurNGc	44119431	91810748	1 Carboxylic Acid,1 Amide,1 Ether	3
6dTal	Neu	44119431	441037	1 Primary Alcohol,1 Carboxylic Acid,1 Primary Amine	3
6dTal	Neu5Ac	44119431	439197	1 Primary Alcohol,1 Carboxylic Acid,1 Amide	3
6dTal	Neu5Gc	44119431	440001	2 Primary Alcohol,1 Carboxylic Acid,1 Amide	4
6dTal	Oli	44119431	10888063	1 Primary Alcohol	1
6dTal	Par	44119431	12303783	1 Primary Alcohol	1
6dTal	Pse	44119431	101137651	1 Primary Alcohol,1 Carboxylic Acid,2 Primary Amine	4
6dTal	Psi	44119431	441036	1 Primary Alcohol	1
6dTal	Qui	44119431	439746		0
6dTal	QuiNAc	44119431	11954187	1 Primary Alcohol,1 Amide	2
6dTal	Rha	44119431	25310		0
6dTal	RhaNAc	44119431	91807222	1 Primary Alcohol,1 Amide	2
6dTal	Rib	44119431	10975657		0
6dTal	Sor	44119431	439192	1 Primary Alcohol	1
6dTal	Tag	44119431	439312	1 Primary Alcohol	1
6dTal	Tal	44119431	441035	1 Primary Alcohol	1
6dTal	TalA	44119431	11298488	1 Carboxylic Acid	1
6dTal	TalN	44119431	9834117	1 Primary Amine	1
6dTal	TalNAc	44119431	57376616	1 Amide	1
6dTal	Tyv	44119431	12303782	1 Primary Alcohol	1
6dTal	Xyl	44119431	135191		0
6dTalNAc	Abe	126961778	160540	1 Amide	1
6dTalNAc	Aci	126961778	126961779	1 Carboxylic Acid,2 Primary Amine,1 Amide	4
6dTalNAc	All	126961778	439507	2 Primary Alcohol,1 Amide	3
6dTalNAc	AllA	126961778	6602103	1 Primary Alcohol,1 Carboxylic Acid,1 Amide	3
6dTalNAc	AllN	126961778	6915732	1 Primary Alcohol,1 Primary Amine,1 Amide	3
6dTalNAc	AllNAc	126961778	10944029	1 Primary Alcohol	1
6dTalNAc	Alt	126961778	10219674	2 Primary Alcohol,1 Amide	3
6dTalNAc	AltA	126961778	56845780	1 Primary Alcohol,1 Carboxylic Acid,1 Amide	3
6dTalNAc	AltN	126961778	6602094	1 Primary Alcohol,1 Primary Amine,1 Amide	3
6dTalNAc	AltNAc	126961778	44717159	1 Primary Alcohol	1
6dTalNAc	Api	126961778	12306753	1 Primary Alcohol,1 Amide	2
6dTalNAc	Ara	126961778	439195	1 Primary Alcohol,1 Amide	2
6dTalNAc	Bac	126961778	54029194	1 Primary Alcohol,2 Primary Amine,1 Amide	4
6dTalNAc	Col	126961778	12303780	1 Amide	1
6dTalNAc	DDmanHep	126961778	53681436	3 Primary Alcohol,1 Amide	4
6dTalNAc	Dha	126961778	15608515	2 Carboxylic Acid,1 Amide	3
6dTalNAc	Dig	126961778	2723626	1 Amide	1
6dTalNAc	Fru	126961778	2723872	2 Primary Alcohol,1 Amide	3
6dTalNAc	Fuc	126961778	17106	1 Primary Alcohol,1 Amide	2
6dTalNAc	FucNAc	126961778	91810489		0
6dTalNAc	Gal	126961778	6036	2 Primary Alcohol,1 Amide	3
6dTalNAc	GalA	126961778	439215	1 Primary Alcohol,1 Carboxylic Acid,1 Amide	3
6dTalNAc	GalN	126961778	24154	1 Primary Alcohol,1 Primary Amine,1 Amide	3
6dTalNAc	GalNAc	126961778	35717	1 Primary Alcohol	1
6dTalNAc	Glc	126961778	5793	2 Primary Alcohol,1 Amide	3
6dTalNAc	GlcA	126961778	94715	1 Primary Alcohol,1 Carboxylic Acid,1 Amide	3
6dTalNAc	GlcN	126961778	439213	1 Primary Alcohol,1 Primary Amine,1 Amide	3
6dTalNAc	GlcNAc	126961778	439174	1 Primary Alcohol	1
6dTalNAc	Gul	126961778	441033	2 Primary Alcohol,1 Amide	3
6dTalNAc	GulA	126961778	11788788	1 Primary Alcohol,1 Carboxylic Acid,1 Amide	3
6dTalNAc	GulN	126961778	9920528	1 Primary Alcohol,1 Primary Amine,1 Amide	3
6dTalNAc	GulNAc	126961778	13201633	1 Primary Alcohol	1
6dTalNAc	Ido	126961778	11030410	2 Primary Alcohol,1 Amide	3
6dTalNAc	IdoA	126961778	441039	1 Primary Alcohol,1 Carboxylic Acid,1 Amide	3
6dTalNAc	IdoN	126961778	91864695	1 Primary Alcohol,1 Primary Amine,1 Amide	3
6dTalNAc	IdoNAc	126961778	13201636	1 Primary Alcohol	1
6dTalNAc	Kdn	126961778	13991616	3 Primary Alcohol,1 Carboxylic Acid,1 Amide	5
6dTalNAc	Kdo	126961778	10857507	2 Primary Alcohol,1 Carboxylic Acid,1 Amide	4
6dTalNAc	Leg	126961778	70678967	1 Carboxylic Acid,2 Primary Amine,1 Amide	4
6dTalNAc	LDmanHep	126961778	21120522	3 Primary Alcohol,1 Amide	4
6dTalNAc	Lyx	126961778	439240	1 Primary Alcohol,1 Amide	2
6dTalNAc	Man	126961778	18950	2 Primary Alcohol,1 Amide	3
6dTalNAc	ManA	126961778	439630	1 Primary Alcohol,1 Carboxylic Acid,1 Amide	3
6dTalNAc	ManN	126961778	440049	1 Primary Alcohol,1 Primary Amine,1 Amide	3
6dTalNAc	ManNAc	126961778	439281	1 Primary Alcohol	1
6dTalNAc	Mur	126961778	441038	1 Carboxylic Acid,1 Primary Amine,1 Amide,1 Ether	4
6dTalNAc	MurNAc	126961778	5462244	1 Carboxylic Acid,1 Ether	2
6dTalNAc	MurNGc	126961778	91810748	1 Primary Alcohol,1 Carboxylic Acid,1 Ether	3
6dTalNAc	Neu	126961778	441037	2 Primary Alcohol,1 Carboxylic Acid,1 Primary Amine,1 Amide	5
6dTalNAc	Neu5Ac	126961778	439197	2 Primary Alcohol,1 Carboxylic Acid	3
6dTalNAc	Neu5Gc	126961778	440001	3 Primary Alcohol,1 Carboxylic Acid	4
6dTalNAc	Oli	126961778	10888063	1 Amide	1
6dTalNAc	Par	126961778	12303783	1 Amide	1
6dTalNAc	Pse	126961778	101137651	1 Carboxylic Acid,2 Primary Amine,1 Amide	4
6dTalNAc	Psi	126961778	441036	2 Primary Alcohol,1 Amide	3
6dTalNAc	Qui	126961778	439746	1 Primary Alcohol,1 Amide	2
6dTalNAc	QuiNAc	126961778	11954187		0
6dTalNAc	Rha	126961778	25310	1 Primary Alcohol,1 Amide	2
6dTalNAc	RhaNAc	126961778	91807222		0
6dTalNAc	Rib	126961778	10975657	1 Primary Alcohol,1 Amide	2
6dTalNAc	Sor	126961778	439192	2 Primary Alcohol,1 Amide	3
6dTalNAc	Tag	126961778	439312	2 Primary Alcohol,1 Amide	3
6dTalNAc	Tal	126961778	441035	2 Primary Alcohol,1 Amide	3
6dTalNAc	TalA	126961778	11298488	1 Primary Alcohol,1 Carboxylic Acid,1 Amide	3
6dTalNAc	TalN	126961778	9834117	1 Primary Alcohol,1 Primary Amine,1 Amide	3
6dTalNAc	TalNAc	126961778	57376616	1 Primary Alcohol	1
6dTalNAc	Tyv	126961778	12303782	1 Amide	1
6dTalNAc	Xyl	126961778	135191	1 Primary Alcohol,1 Amide	2
Abe	Aci	160540	126961779	1 Carboxylic Acid,2 Primary Amine	3
Abe	All	160540	439507	2 Primary Alcohol	2
Abe	AllA	160540	6602103	1 Primary Alcohol,1 Carboxylic Acid	2
Abe	AllN	160540	6915732	1 Primary Alcohol,1 Primary Amine	2
Abe	AllNAc	160540	10944029	1 Primary Alcohol,1 Amide	2
Abe	Alt	160540	10219674	2 Primary Alcohol	2
Abe	AltA	160540	56845780	1 Primary Alcohol,1 Carboxylic Acid	2
Abe	AltN	160540	6602094	1 Primary Alcohol,1 Primary Amine	2
Abe	AltNAc	160540	44717159	1 Primary Alcohol,1 Amide	2
Abe	Api	160540	12306753	1 Primary Alcohol	1
Abe	Ara	160540	439195	1 Primary Alcohol	1
Abe	Bac	160540	54029194	1 Primary Alcohol,2 Primary Amine	3
Abe	Col	160540	12303780		0
Abe	DDmanHep	160540	53681436	3 Primary Alcohol	3
Abe	Dha	160540	15608515	2 Carboxylic Acid	2
Abe	Dig	160540	2723626		0
Abe	Fru	160540	2723872	2 Primary Alcohol	2
Abe	Fuc	160540	17106	1 Primary Alcohol	1
Abe	FucNAc	160540	91810489	1 Amide	1
Abe	Gal	160540	6036	2 Primary Alcohol	2
Abe	GalA	160540	439215	1 Primary Alcohol,1 Carboxylic Acid	2
Abe	GalN	160540	24154	1 Primary Alcohol,1 Primary Amine	2
Abe	GalNAc	160540	35717	1 Primary Alcohol,1 Amide	2
Abe	Glc	160540	5793	2 Primary Alcohol	2
Abe	GlcA	160540	94715	1 Primary Alcohol,1 Carboxylic Acid	2
Abe	GlcN	160540	439213	1 Primary Alcohol,1 Primary Amine	2
Abe	GlcNAc	160540	439174	1 Primary Alcohol,1 Amide	2
Abe	Gul	160540	441033	2 Primary Alcohol	2
Abe	GulA	160540	11788788	1 Primary Alcohol,1 Carboxylic Acid	2
Abe	GulN	160540	9920528	1 Primary Alcohol,1 Primary Amine	2
Abe	GulNAc	160540	13201633	1 Primary Alcohol,1 Amide	2
Abe	Ido	160540	11030410	2 Primary Alcohol	2
Abe	IdoA	160540	441039	1 Primary Alcohol,1 Carboxylic Acid	2
Abe	IdoN	160540	91864695	1 Primary Alcohol,1 Primary Amine	2
Abe	IdoNAc	160540	13201636	1 Primary Alcohol,1 Amide	2
Abe	Kdn	160540	13991616	3 Primary Alcohol,1 Carboxylic Acid	4
Abe	Kdo	160540	10857507	2 Primary Alcohol,1 Carboxylic Acid	3
Abe	Leg	160540	70678967	1 Carboxylic Acid,2 Primary Amine	3
Abe	LDmanHep	160540	21120522	3 Primary Alcohol	3
Abe	Lyx	160540	439240	1 Primary Alcohol	1
Abe	Man	160540	18950	2 Primary Alcohol	2
Abe	ManA	160540	439630	1 Primary Alcohol,1 Carboxylic Acid	2
Abe	ManN	160540	440049	1 Primary Alcohol,1 Primary Amine	2
Abe	ManNAc	160540	439281	1 Primary Alcohol,1 Amide	2
Abe	Mur	160540	441038	1 Carboxylic Acid,1 Primary Amine,1 Ether	3
Abe	MurNAc	160540	5462244	1 Carboxylic Acid,1 Amide,1 Ether	3
Abe	MurNGc	160540	91810748	1 Primary Alcohol,1 Carboxylic Acid,1 Amide,1 Ether	4
Abe	Neu	160540	441037	2 Primary Alcohol,1 Carboxylic Acid,1 Primary Amine	4
Abe	Neu5Ac	160540	439197	2 Primary Alcohol,1 Carboxylic Acid,1 Amide	4
Abe	Neu5Gc	160540	440001	3 Primary Alcohol,1 Carboxylic Acid,1 Amide	5
Abe	Oli	160540	10888063		0
Abe	Par	160540	12303783		0
Abe	Pse	160540	101137651	1 Carboxylic Acid,2 Primary Amine	3
Abe	Psi	160540	441036	2 Primary Alcohol	2
Abe	Qui	160540	439746	1 Primary Alcohol	1
Abe	QuiNAc	160540	11954187	1 Amide	1
Abe	Rha	160540	25310	1 Primary Alcohol	1
Abe	RhaNAc	160540	91807222	1 Amide	1
Abe	Rib	160540	10975657	1 Primary Alcohol	1
Abe	Sor	160540	439192	2 Primary Alcohol	2
Abe	Tag	160540	439312	2 Primary Alcohol	2
Abe	Tal	160540	441035	2 Primary Alcohol	2
Abe	TalA	160540	11298488	1 Primary Alcohol,1 Carboxylic Acid	2
Abe	TalN	160540	9834117	1 Primary Alcohol,1 Primary Amine	2
Abe	TalNAc	160540	57376616	1 Primary Alcohol,1 Amide	2
Abe	Tyv	160540	12303782		0
Abe	Xyl	160540	135191	1 Primary Alcohol	1
Aci	All	126961779	439507	2 Primary Alcohol,1 Carboxylic Acid,2 Primary Amine	5
Aci	AllA	126961779	6602103	1 Primary Alcohol,2 Primary Amine	3
Aci	AllN	126961779	6915732	1 Primary Alcohol,1 Carboxylic Acid,1 Primary Amine	3
Aci	AllNAc	126961779	10944029	1 Primary Alcohol,1 Carboxylic Acid,1 Amide	3
Aci	Alt	126961779	10219674	2 Primary Alcohol,1 Carboxylic Acid,2 Primary Amine	5
Aci	AltA	126961779	56845780	1 Primary Alcohol,2 Primary Amine	3
Aci	AltN	126961779	6602094	1 Primary Alcohol,1 Carboxylic Acid,1 Primary Amine	3
Aci	AltNAc	126961779	44717159	1 Primary Alcohol,1 Carboxylic Acid,1 Amide	3
Aci	Api	126961779	12306753	1 Primary Alcohol,1 Carboxylic Acid,2 Primary Amine	4
Aci	Ara	126961779	439195	1 Primary Alcohol,1 Carboxylic Acid,2 Primary Amine	4
Aci	Bac	126961779	54029194	1 Primary Alcohol,1 Carboxylic Acid	2
Aci	Col	126961779	12303780	1 Carboxylic Acid,2 Primary Amine	3
Aci	DDmanHep	126961779	53681436	3 Primary Alcohol,1 Carboxylic Acid,2 Primary Amine	6
Aci	Dha	126961779	15608515	1 Carboxylic Acid,2 Primary Amine	3
Aci	Dig	126961779	2723626	1 Carboxylic Acid,2 Primary Amine	3
Aci	Fru	126961779	2723872	2 Primary Alcohol,1 Carboxylic Acid,2 Primary Amine	5
Aci	Fuc	126961779	17106	1 Primary Alcohol,1 Carboxylic Acid,2 Primary Amine	4
Aci	FucNAc	126961779	91810489	1 Carboxylic Acid,2 Primary Amine,1 Amide	4
Aci	Gal	126961779	6036	2 Primary Alcohol,1 Carboxylic Acid,2 Primary Amine	5
Aci	GalA	126961779	439215	1 Primary Alcohol,2 Primary Amine	3
Aci	GalN	126961779	24154	1 Primary Alcohol,1 Carboxylic Acid,1 Primary Amine	3
Aci	GalNAc	126961779	35717	1 Primary Alcohol,1 Carboxylic Acid,1 Amide	3
Aci	Glc	126961779	5793	2 Primary Alcohol,1 Carboxylic Acid,2 Primary Amine	5
Aci	GlcA	126961779	94715	1 Primary Alcohol,2 Primary Amine	3
Aci	GlcN	126961779	439213	1 Primary Alcohol,1 Carboxylic Acid,1 Primary Amine	3
Aci	GlcNAc	126961779	439174	1 Primary Alcohol,1 Carboxylic Acid,1 Amide	3
Aci	Gul	126961779	441033	2 Primary Alcohol,1 Carboxylic Acid,2 Primary Amine	5
Aci	GulA	126961779	11788788	1 Primary Alcohol,2 Primary Amine	3
Aci	GulN	126961779	9920528	1 Primary Alcohol,1 Carboxylic Acid,1 Primary Amine	3
Aci	GulNAc	126961779	13201633	1 Primary Alcohol,1 Carboxylic Acid,1 Amide	3
Aci	Ido	126961779	11030410	2 Primary Alcohol,1 Carboxylic Acid,2 Primary Amine	5
Aci	IdoA	126961779	441039	1 Primary Alcohol,2 Primary Amine	3
Aci	IdoN	126961779	91864695	1 Primary Alcohol,1 Carboxylic Acid,1 Primary Amine	3
Aci	IdoNAc	126961779	13201636	1 Primary Alcohol,1 Carboxylic Acid,1 Amide	3
Aci	Kdn	126961779	13991616	3 Primary Alcohol,2 Primary Amine	5
Aci	Kdo	126961779	10857507	2 Primary Alcohol,2 Primary Amine	4
Aci	Leg	126961779	70678967		0
Aci	LDmanHep	126961779	21120522	3 Primary Alcohol,1 Carboxylic Acid,2 Primary Amine	6
Aci	Lyx	126961779	439240	1 Primary Alcohol,1 Carboxylic Acid,2 Primary Amine	4
Aci	Man	126961779	18950	2 Primary Alcohol,1 Carboxylic Acid,2 Primary Amine	5
Aci	ManA	126961779	439630	1 Primary Alcohol,2 Primary Amine	3
Aci	ManN	126961779	440049	1 Primary Alcohol,1 Carboxylic Acid,1 Primary Amine	3
Aci	ManNAc	126961779	439281	1 Primary Alcohol,1 Carboxylic Acid,1 Amide	3
Aci	Mur	126961779	441038	1 Primary Amine,1 Ether	2
Aci	MurNAc	126961779	5462244	2 Primary Amine,1 Amide,1 Ether	4
Aci	MurNGc	126961779	91810748	1 Primary Alcohol,2 Primary Amine,1 Amide,1 Ether	5
Aci	Neu	126961779	441037	2 Primary Alcohol,1 Primary Amine	3
Aci	Neu5Ac	126961779	439197	2 Primary Alcohol,2 Primary Amine,1 Amide	5
Aci	Neu5Gc	126961779	440001	3 Primary Alcohol,2 Primary Amine,1 Amide	6
Aci	Oli	126961779	10888063	1 Carboxylic Acid,2 Primary Amine	3
Aci	Par	126961779	12303783	1 Carboxylic Acid,2 Primary Amine	3
Aci	Pse	126961779	101137651		0
Aci	Psi	126961779	441036	2 Primary Alcohol,1 Carboxylic Acid,2 Primary Amine	5
Aci	Qui	126961779	439746	1 Primary Alcohol,1 Carboxylic Acid,2 Primary Amine	4
Aci	QuiNAc	126961779	11954187	1 Carboxylic Acid,2 Primary Amine,1 Amide	4
Aci	Rha	126961779	25310	1 Primary Alcohol,1 Carboxylic Acid,2 Primary Amine	4
Aci	RhaNAc	126961779	91807222	1 Carboxylic Acid,2 Primary Amine,1 Amide	4
Aci	Rib	126961779	10975657	1 Primary Alcohol,1 Carboxylic Acid,2 Primary Amine	4
Aci	Sor	126961779	439192	2 Primary Alcohol,1 Carboxylic Acid,2 Primary Amine	5
Aci	Tag	126961779	439312	2 Primary Alcohol,1 Carboxylic Acid,2 Primary Amine	5
Aci	Tal	126961779	441035	2 Primary Alcohol,1 Carboxylic Acid,2 Primary Amine	5
Aci	TalA	126961779	11298488	1 Primary Alcohol,2 Primary Amine	3
Aci	TalN	126961779	9834117	1 Primary Alcohol,1 Carboxylic Acid,1 Primary Amine	3
Aci	TalNAc	126961779	57376616	1 Primary Alcohol,1 Carboxylic Acid,1 Amide	3
Aci	Tyv	126961779	12303782	1 Carboxylic Acid,2 Primary Amine	3
Aci	Xyl	126961779	135191	1 Primary Alcohol,1 Carboxylic Acid,2 Primary Amine	4
All	AllA	439507	6602103	1 Primary Alcohol,1 Carboxylic Acid	2
All	AllN	439507	6915732	1 Primary Alcohol,1 Primary Amine	2
All	AllNAc	439507	10944029	1 Primary Alcohol,1 Amide	2
All	Alt	439507	10219674		0
All	AltA	439507	56845780	1 Primary Alcohol,1 Carboxylic Acid	2
All	AltN	439507	6602094	1 Primary Alcohol,1 Primary Amine	2
All	AltNAc	439507	44717159	1 Primary Alcohol,1 Amide	2
All	Api	439507	12306753	1 Primary Alcohol	1
All	Ara	439507	439195	1 Primary Alcohol	1
All	Bac	439507	54029194	3 Primary Alcohol,2 Primary Amine	5
All	Col	439507	12303780	2 Primary Alcohol	2
All	DDmanHep	439507	53681436	1 Primary Alcohol	1
All	Dha	439507	15608515	2 Primary Alcohol,2 Carboxylic Acid	4
All	Dig	439507	2723626	2 Primary Alcohol	2
All	Fru	439507	2723872		0
All	Fuc	439507	17106	1 Primary Alcohol	1
All	FucNAc	439507	91810489	2 Primary Alcohol,1 Amide	3
All	Gal	439507	6036		0
All	GalA	439507	439215	1 Primary Alcohol,1 Carboxylic Acid	2
All	GalN	439507	24154	1 Primary Alcohol,1 Primary Amine	2
All	GalNAc	439507	35717	1 Primary Alcohol,1 Amide	2
All	Glc	439507	5793		0
All	GlcA	439507	94715	1 Primary Alcohol,1 Carboxylic Acid	2
All	GlcN	439507	439213	1 Primary Alcohol,1 Primary Amine	2
All	GlcNAc	439507	439174	1 Primary Alcohol,1 Amide	2
All	Gul	439507	441033		0
All	GulA	439507	11788788	1 Primary Alcohol,1 Carboxylic Acid	2
All	GulN	439507	9920528	1 Primary Alcohol,1 Primary Amine	2
All	GulNAc	439507	13201633	1 Primary Alcohol,1 Amide	2
All	Ido	439507	11030410		0
All	IdoA	439507	441039	1 Primary Alcohol,1 Carboxylic Acid	2
All	IdoN	439507	91864695	1 Primary Alcohol,1 Primary Amine	2
All	IdoNAc	439507	13201636	1 Primary Alcohol,1 Amide	2
All	Kdn	439507	13991616	1 Primary Alcohol,1 Carboxylic Acid	2
All	Kdo	439507	10857507	1 Carboxylic Acid	1
All	Leg	439507	70678967	2 Primary Alcohol,1 Carboxylic Acid,2 Primary Amine	5
All	LDmanHep	439507	21120522	1 Primary Alcohol	1
All	Lyx	439507	439240	1 Primary Alcohol	1
All	Man	439507	18950		0
All	ManA	439507	439630	1 Primary Alcohol,1 Carboxylic Acid	2
All	ManN	439507	440049	1 Primary Alcohol,1 Primary Amine	2
All	ManNAc	439507	439281	1 Primary Alcohol,1 Amide	2
All	Mur	439507	441038	2 Primary Alcohol,1 Carboxylic Acid,1 Primary Amine,1 Ether	5
All	MurNAc	439507	5462244	2 Primary Alcohol,1 Carboxylic Acid,1 Amide,1 Ether	5
All	MurNGc	439507	91810748	1 Primary Alcohol,1 Carboxylic Acid,1 Amide,1 Ether	4
All	Neu	439507	441037	1 Carboxylic Acid,1 Primary Amine	2
All	Neu5Ac	439507	439197	1 Carboxylic Acid,1 Amide	2
All	Neu5Gc	439507	440001	1 Primary Alcohol,1 Carboxylic Acid,1 Amide	3
All	Oli	439507	10888063	2 Primary Alcohol	2
All	Par	439507	12303783	2 Primary Alcohol	2
All	Pse	439507	101137651	2 Primary Alcohol,1 Carboxylic Acid,2 Primary Amine	5
All	Psi	439507	441036		0
All	Qui	439507	439746	1 Primary Alcohol	1
All	QuiNAc	439507	11954187	2 Primary Alcohol,1 Amide	3
All	Rha	439507	25310	1 Primary Alcohol	1
All	RhaNAc	439507	91807222	2 Primary Alcohol,1 Amide	3
All	Rib	439507	10975657	1 Primary Alcohol	1
All	Sor	439507	439192		0
All	Tag	439507	439312		0
All	Tal	439507	441035		0
All	TalA	439507	11298488	1 Primary Alcohol,1 Carboxylic Acid	2
All	TalN	439507	9834117	1 Primary Alcohol,1 Primary Amine	2
All	TalNAc	439507	57376616	1 Primary Alcohol,1 Amide	2
All	Tyv	439507	12303782	2 Primary Alcohol	2
All	Xyl	439507	135191	1 Primary Alcohol	1
AllA	AllN	6602103	6915732	1 Carboxylic Acid,1 Primary Amine	2
AllA	AllNAc	6602103	10944029	1 Carboxylic Acid,1 Amide	2
AllA	Alt	6602103	10219674	1 Primary Alcohol,1 Carboxylic Acid	2
AllA	AltA	6602103	56845780		0
AllA	AltN	6602103	6602094	1 Carboxylic Acid,1 Primary Amine	2
AllA	AltNAc	6602103	44717159	1 Carboxylic Acid,1 Amide	2
AllA	Api	6602103	12306753	1 Carboxylic Acid	1
AllA	Ara	6602103	439195	1 Carboxylic Acid	1
AllA	Bac	6602103	54029194	2 Primary Alcohol,1 Carboxylic Acid,2 Primary Amine	5
AllA	Col	6602103	12303780	1 Primary Alcohol,1 Carboxylic Acid	2
AllA	DDmanHep	6602103	53681436	2 Primary Alcohol,1 Carboxylic Acid	3
AllA	Dha	6602103	15608515	1 Primary Alcohol,1 Carboxylic Acid	2
AllA	Dig	6602103	2723626	1 Primary Alcohol,1 Carboxylic Acid	2
AllA	Fru	6602103	2723872	1 Primary Alcohol,1 Carboxylic Acid	2
AllA	Fuc	6602103	17106	1 Carboxylic Acid	1
AllA	FucNAc	6602103	91810489	1 Primary Alcohol,1 Carboxylic Acid,1 Amide	3
AllA	Gal	6602103	6036	1 Primary Alcohol,1 Carboxylic Acid	2
AllA	GalA	6602103	439215		0
AllA	GalN	6602103	24154	1 Carboxylic Acid,1 Primary Amine	2
AllA	GalNAc	6602103	35717	1 Carboxylic Acid,1 Amide	2
AllA	Glc	6602103	5793	1 Primary Alcohol,1 Carboxylic Acid	2
AllA	GlcA	6602103	94715		0
AllA	GlcN	6602103	439213	1 Carboxylic Acid,1 Primary Amine	2
AllA	GlcNAc	6602103	439174	1 Carboxylic Acid,1 Amide	2
AllA	Gul	6602103	441033	1 Primary Alcohol,1 Carboxylic Acid	2
AllA	GulA	6602103	11788788		0
AllA	GulN	6602103	9920528	1 Carboxylic Acid,1 Primary Amine	2
AllA	GulNAc	6602103	13201633	1 Carboxylic Acid,1 Amide	2
AllA	Ido	6602103	11030410	1 Primary Alcohol,1 Carboxylic Acid	2
AllA	IdoA	6602103	441039		0
AllA	IdoN	6602103	91864695	1 Carboxylic Acid,1 Primary Amine	2
AllA	IdoNAc	6602103	13201636	1 Carboxylic Acid,1 Amide	2
AllA	Kdn	6602103	13991616	2 Primary Alcohol	2
AllA	Kdo	6602103	10857507	1 Primary Alcohol	1
AllA	Leg	6602103	70678967	1 Primary Alcohol,2 Primary Amine	3
AllA	LDmanHep	6602103	21120522	2 Primary Alcohol,1 Carboxylic Acid	3
AllA	Lyx	6602103	439240	1 Carboxylic Acid	1
AllA	Man	6602103	18950	1 Primary Alcohol,1 Carboxylic Acid	2
AllA	ManA	6602103	439630		0
AllA	ManN	6602103	440049	1 Carboxylic Acid,1 Primary Amine	2
AllA	ManNAc	6602103	439281	1 Carboxylic Acid,1 Amide	2
AllA	Mur	6602103	441038	1 Primary Alcohol,1 Primary Amine,1 Ether	3
AllA	MurNAc	6602103	5462244	1 Primary Alcohol,1 Amide,1 Ether	3
AllA	MurNGc	6602103	91810748	1 Amide,1 Ether	2
AllA	Neu	6602103	441037	1 Primary Alcohol,1 Primary Amine	2
AllA	Neu5Ac	6602103	439197	1 Primary Alcohol,1 Amide	2
AllA	Neu5Gc	6602103	440001	2 Primary Alcohol,1 Amide	3
AllA	Oli	6602103	10888063	1 Primary Alcohol,1 Carboxylic Acid	2
AllA	Par	6602103	12303783	1 Primary Alcohol,1 Carboxylic Acid	2
AllA	Pse	6602103	101137651	1 Primary Alcohol,2 Primary Amine	3
AllA	Psi	6602103	441036	1 Primary Alcohol,1 Carboxylic Acid	2
AllA	Qui	6602103	439746	1 Carboxylic Acid	1
AllA	QuiNAc	6602103	11954187	1 Primary Alcohol,1 Carboxylic Acid,1 Amide	3
AllA	Rha	6602103	25310	1 Carboxylic Acid	1
AllA	RhaNAc	6602103	91807222	1 Primary Alcohol,1 Carboxylic Acid,1 Amide	3
AllA	Rib	6602103	10975657	1 Carboxylic Acid	1
AllA	Sor	6602103	439192	1 Primary Alcohol,1 Carboxylic Acid	2
AllA	Tag	6602103	439312	1 Primary Alcohol,1 Carboxylic Acid	2
AllA	Tal	6602103	441035	1 Primary Alcohol,1 Carboxylic Acid	2
AllA	TalA	6602103	11298488		0
AllA	TalN	6602103	9834117	1 Carboxylic Acid,1 Primary Amine	2
AllA	TalNAc	6602103	57376616	1 Carboxylic Acid,1 Amide	2
AllA	Tyv	6602103	12303782	1 Primary Alcohol,1 Carboxylic Acid	2
AllA	Xyl	6602103	135191	1 Carboxylic Acid	1
AllN	AllNAc	6915732	10944029	1 Primary Amine,1 Amide	2
AllN	Alt	6915732	10219674	1 Primary Alcohol,1 Primary Amine	2
AllN	AltA	6915732	56845780	1 Carboxylic Acid,1 Primary Amine	2
AllN	AltN	6915732	6602094		0
AllN	AltNAc	6915732	44717159	1 Primary Amine,1 Amide	2
AllN	Api	6915732	12306753	1 Primary Amine	1
AllN	Ara	6915732	439195	1 Primary Amine	1
AllN	Bac	6915732	54029194	2 Primary Alcohol,1 Primary Amine	3
AllN	Col	6915732	12303780	1 Primary Alcohol,1 Primary Amine	2
AllN	DDmanHep	6915732	53681436	2 Primary Alcohol,1 Primary Amine	3
AllN	Dha	6915732	15608515	1 Primary Alcohol,2 Carboxylic Acid,1 Primary Amine	4
AllN	Dig	6915732	2723626	1 Primary Alcohol,1 Primary Amine	2
AllN	Fru	6915732	2723872	1 Primary Alcohol,1 Primary Amine	2
AllN	Fuc	6915732	17106	1 Primary Amine	1
AllN	FucNAc	6915732	91810489	1 Primary Alcohol,1 Primary Amine,1 Amide	3
AllN	Gal	6915732	6036	1 Primary Alcohol,1 Primary Amine	2
AllN	GalA	6915732	439215	1 Carboxylic Acid,1 Primary Amine	2
AllN	GalN	6915732	24154		0
AllN	GalNAc	6915732	35717	1 Primary Amine,1 Amide	2
AllN	Glc	6915732	5793	1 Primary Alcohol,1 Primary Amine	2
AllN	GlcA	6915732	94715	1 Carboxylic Acid,1 Primary Amine	2
AllN	GlcN	6915732	439213		0
AllN	GlcNAc	6915732	439174	1 Primary Amine,1 Amide	2
AllN	Gul	6915732	441033	1 Primary Alcohol,1 Primary Amine	2
AllN	GulA	6915732	11788788	1 Carboxylic Acid,1 Primary Amine	2
AllN	GulN	6915732	9920528		0
AllN	GulNAc	6915732	13201633	1 Primary Amine,1 Amide	2
AllN	Ido	6915732	11030410	1 Primary Alcohol,1 Primary Amine	2
AllN	IdoA	6915732	441039	1 Carboxylic Acid,1 Primary Amine	2
AllN	IdoN	6915732	91864695		0
AllN	IdoNAc	6915732	13201636	1 Primary Amine,1 Amide	2
AllN	Kdn	6915732	13991616	2 Primary Alcohol,1 Carboxylic Acid,1 Primary Amine	4
AllN	Kdo	6915732	10857507	1 Primary Alcohol,1 Carboxylic Acid,1 Primary Amine	3
AllN	Leg	6915732	70678967	1 Primary Alcohol,1 Carboxylic Acid,1 Primary Amine	3
AllN	LDmanHep	6915732	21120522	2 Primary Alcohol,1 Primary Amine	3
AllN	Lyx	6915732	439240	1 Primary Amine	1
AllN	Man	6915732	18950	1 Primary Alcohol,1 Primary Amine	2
AllN	ManA	6915732	439630	1 Carboxylic Acid,1 Primary Amine	2
AllN	ManN	6915732	440049		0
AllN	ManNAc	6915732	439281	1 Primary Amine,1 Amide	2
AllN	Mur	6915732	441038	1 Primary Alcohol,1 Carboxylic Acid,1 Ether	3
AllN	MurNAc	6915732	5462244	1 Primary Alcohol,1 Carboxylic Acid,1 Primary Amine,1 Amide,1 Ether	5
AllN	MurNGc	6915732	91810748	1 Carboxylic Acid,1 Primary Amine,1 Amide,1 Ether	4
AllN	Neu	6915732	441037	1 Primary Alcohol,1 Carboxylic Acid	2
AllN	Neu5Ac	6915732	439197	1 Primary Alcohol,1 Carboxylic Acid,1 Primary Amine,1 Amide	4
AllN	Neu5Gc	6915732	440001	2 Primary Alcohol,1 Carboxylic Acid,1 Primary Amine,1 Amide	5
AllN	Oli	6915732	10888063	1 Primary Alcohol,1 Primary Amine	2
AllN	Par	6915732	12303783	1 Primary Alcohol,1 Primary Amine	2
AllN	Pse	6915732	101137651	1 Primary Alcohol,1 Carboxylic Acid,1 Primary Amine	3
AllN	Psi	6915732	441036	1 Primary Alcohol,1 Primary Amine	2
AllN	Qui	6915732	439746	1 Primary Amine	1
AllN	QuiNAc	6915732	11954187	1 Primary Alcohol,1 Primary Amine,1 Amide	3
AllN	Rha	6915732	25310	1 Primary Amine	1
AllN	RhaNAc	6915732	91807222	1 Primary Alcohol,1 Primary Amine,1 Amide	3
AllN	Rib	6915732	10975657	1 Primary Amine	1
AllN	Sor	6915732	439192	1 Primary Alcohol,1 Primary Amine	2
AllN	Tag	6915732	439312	1 Primary Alcohol,1 Primary Amine	2
AllN	Tal	6915732	441035	1 Primary Alcohol,1 Primary Amine	2
AllN	TalA	6915732	11298488	1 Carboxylic Acid,1 Primary Amine	2
AllN	TalN	6915732	9834117		0
AllN	TalNAc	6915732	57376616	1 Primary Amine,1 Amide	2
AllN	Tyv	6915732	12303782	1 Primary Alcohol,1 Primary Amine	2
AllN	Xyl	6915732	135191	1 Primary Amine	1
AllNAc	Alt	10944029	10219674	1 Primary Alcohol,1 Amide	2
AllNAc	AltA	10944029	56845780	1 Carboxylic Acid,1 Amide	2
AllNAc	AltN	10944029	6602094	1 Primary Amine,1 Amide	2
AllNAc	AltNAc	10944029	44717159		0
AllNAc	Api	10944029	12306753	1 Amide	1
AllNAc	Ara	10944029	439195	1 Amide	1
AllNAc	Bac	10944029	54029194	2 Primary Alcohol,2 Primary Amine,1 Amide	5
AllNAc	Col	10944029	12303780	1 Primary Alcohol,1 Amide	2
AllNAc	DDmanHep	10944029	53681436	2 Primary Alcohol,1 Amide	3
AllNAc	Dha	10944029	15608515	1 Primary Alcohol,2 Carboxylic Acid,1 Amide	4
AllNAc	Dig	10944029	2723626	1 Primary Alcohol,1 Amide	2
AllNAc	Fru	10944029	2723872	1 Primary Alcohol,1 Amide	2
AllNAc	Fuc	10944029	17106	1 Amide	1
AllNAc	FucNAc	10944029	91810489	1 Primary Alcohol	1
AllNAc	Gal	10944029	6036	1 Primary Alcohol,1 Amide	2
AllNAc	GalA	10944029	439215	1 Carboxylic Acid,1 Amide	2
AllNAc	GalN	10944029	24154	1 Primary Amine,1 Amide	2
AllNAc	GalNAc	10944029	35717		0
AllNAc	Glc	10944029	5793	1 Primary Alcohol,1 Amide	2
AllNAc	GlcA	10944029	94715	1 Carboxylic Acid,1 Amide	2
AllNAc	GlcN	10944029	439213	1 Primary Amine,1 Amide	2
AllNAc	GlcNAc	10944029	439174		0
AllNAc	Gul	10944029	441033	1 Primary Alcohol,1 Amide	2
AllNAc	GulA	10944029	11788788	1 Carboxylic Acid,1 Amide	2
AllNAc	GulN	10944029	9920528	1 Primary Amine,1 Amide	2
AllNAc	GulNAc	10944029	13201633		0
AllNAc	Ido	10944029	11030410	1 Primary Alcohol,1 Amide	2
AllNAc	IdoA	10944029	441039	1 Carboxylic Acid,1 Amide	2
AllNAc	IdoN	10944029	91864695	1 Primary Amine,1 Amide	2
AllNAc	IdoNAc	10944029	13201636		0
AllNAc	Kdn	10944029	13991616	2 Primary Alcohol,1 Carboxylic Acid,1 Amide	4
AllNAc	Kdo	10944029	10857507	1 Primary Alcohol,1 Carboxylic Acid,1 Amide	3
AllNAc	Leg	10944029	70678967	1 Primary Alcohol,1 Carboxylic Acid,2 Primary Amine,1 Amide	5
AllNAc	LDmanHep	10944029	21120522	2 Primary Alcohol,1 Amide	3
AllNAc	Lyx	10944029	439240	1 Amide	1
AllNAc	Man	10944029	18950	1 Primary Alcohol,1 Amide	2
AllNAc	ManA	10944029	439630	1 Carboxylic Acid,1 Amide	2
AllNAc	ManN	10944029	440049	1 Primary Amine,1 Amide	2
AllNAc	ManNAc	10944029	439281		0
AllNAc	Mur	10944029	441038	1 Primary Alcohol,1 Carboxylic Acid,1 Primary Amine,1 Amide,1 Ether	5
AllNAc	MurNAc	10944029	5462244	1 Primary Alcohol,1 Carboxylic Acid,1 Ether	3
AllNAc	MurNGc	10944029	91810748	1 Carboxylic Acid,1 Amide,1 Ether	3
AllNAc	Neu	10944029	441037	1 Primary Alcohol,1 Carboxylic Acid,1 Primary Amine,1 Amide	4
AllNAc	Neu5Ac	10944029	439197	1 Primary Alcohol,1 Carboxylic Acid	2
AllNAc	Neu5Gc	10944029	440001	2 Primary Alcohol,1 Carboxylic Acid	3
AllNAc	Oli	10944029	10888063	1 Primary Alcohol,1 Amide	2
AllNAc	Par	10944029	12303783	1 Primary Alcohol,1 Amide	2
AllNAc	Pse	10944029	101137651	1 Primary Alcohol,1 Carboxylic Acid,2 Primary Amine,1 Amide	5
AllNAc	Psi	10944029	441036	1 Primary Alcohol,1 Amide	2
AllNAc	Qui	10944029	439746	1 Amide	1
AllNAc	QuiNAc	10944029	11954187	1 Primary Alcohol	1
AllNAc	Rha	10944029	25310	1 Amide	1
AllNAc	RhaNAc	10944029	91807222	1 Primary Alcohol	1
AllNAc	Rib	10944029	10975657	1 Amide	1
AllNAc	Sor	10944029	439192	1 Primary Alcohol,1 Amide	2
AllNAc	Tag	10944029	439312	1 Primary Alcohol,1 Amide	2
AllNAc	Tal	10944029	441035	1 Primary Alcohol,1 Amide	2
AllNAc	TalA	10944029	11298488	1 Carboxylic Acid,1 Amide	2
AllNAc	TalN	10944029	9834117	1 Primary Amine,1 Amide	2
AllNAc	TalNAc	10944029	57376616		0
AllNAc	Tyv	10944029	12303782	1 Primary Alcohol,1 Amide	2
AllNAc	Xyl	10944029	135191	1 Amide	1
Alt	AltA	10219674	56845780	1 Primary Alcohol,1 Carboxylic Acid	2
Alt	AltN	10219674	6602094	1 Primary Alcohol,1 Primary Amine	2
Alt	AltNAc	10219674	44717159	1 Primary Alcohol,1 Amide	2
Alt	Api	10219674	12306753	1 Primary Alcohol	1
Alt	Ara	10219674	439195	1 Primary Alcohol	1
Alt	Bac	10219674	54029194	3 Primary Alcohol,2 Primary Amine	5
Alt	Col	10219674	12303780	2 Primary Alcohol	2
Alt	DDmanHep	10219674	53681436	1 Primary Alcohol	1
Alt	Dha	10219674	15608515	2 Primary Alcohol,2 Carboxylic Acid	4
Alt	Dig	10219674	2723626	2 Primary Alcohol	2
Alt	Fru	10219674	2723872		0
Alt	Fuc	10219674	17106	1 Primary Alcohol	1
Alt	FucNAc	10219674	91810489	2 Primary Alcohol,1 Amide	3
Alt	Gal	10219674	6036		0
Alt	GalA	10219674	439215	1 Primary Alcohol,1 Carboxylic Acid	2
Alt	GalN	10219674	24154	1 Primary Alcohol,1 Primary Amine	2
Alt	GalNAc	10219674	35717	1 Primary Alcohol,1 Amide	2
Alt	Glc	10219674	5793		0
Alt	GlcA	10219674	94715	1 Primary Alcohol,1 Carboxylic Acid	2
Alt	GlcN	10219674	439213	1 Primary Alcohol,1 Primary Amine	2
Alt	GlcNAc	10219674	439174	1 Primary Alcohol,1 Amide	2
Alt	Gul	10219674	441033		0
Alt	GulA	10219674	11788788	1 Primary Alcohol,1 Carboxylic Acid	2
Alt	GulN	10219674	9920528	1 Primary Alcohol,1 Primary Amine	2
Alt	GulNAc	10219674	13201633	1 Primary Alcohol,1 Amide	2
Alt	Ido	10219674	11030410		0
Alt	IdoA	10219674	441039	1 Primary Alcohol,1 Carboxylic Acid	2
Alt	IdoN	10219674	91864695	1 Primary Alcohol,1 Primary Amine	2
Alt	IdoNAc	10219674	13201636	1 Primary Alcohol,1 Amide	2
Alt	Kdn	10219674	13991616	1 Primary Alcohol,1 Carboxylic Acid	2
Alt	Kdo	10219674	10857507	1 Carboxylic Acid	1
Alt	Leg	10219674	70678967	2 Primary Alcohol,1 Carboxylic Acid,2 Primary Amine	5
Alt	LDmanHep	10219674	21120522	1 Primary Alcohol	1
Alt	Lyx	10219674	439240	1 Primary Alcohol	1
Alt	Man	10219674	18950		0
Alt	ManA	10219674	439630	1 Primary Alcohol,1 Carboxylic Acid	2
Alt	ManN	10219674	440049	1 Primary Alcohol,1 Primary Amine	2
Alt	ManNAc	10219674	439281	1 Primary Alcohol,1 Amide	2
Alt	Mur	10219674	441038	2 Primary Alcohol,1 Carboxylic Acid,1 Primary Amine,1 Ether	5
Alt	MurNAc	10219674	5462244	2 Primary Alcohol,1 Carboxylic Acid,1 Amide,1 Ether	5
Alt	MurNGc	10219674	91810748	1 Primary Alcohol,1 Carboxylic Acid,1 Amide,1 Ether	4
Alt	Neu	10219674	441037	1 Carboxylic Acid,1 Primary Amine	2
Alt	Neu5Ac	10219674	439197	1 Carboxylic Acid,1 Amide	2
Alt	Neu5Gc	10219674	440001	1 Primary Alcohol,1 Carboxylic Acid,1 Amide	3
Alt	Oli	10219674	10888063	2 Primary Alcohol	2
Alt	Par	10219674	12303783	2 Primary Alcohol	2
Alt	Pse	10219674	101137651	2 Primary Alcohol,1 Carboxylic Acid,2 Primary Amine	5
Alt	Psi	10219674	441036		0
Alt	Qui	10219674	439746	1 Primary Alcohol	1
Alt	QuiNAc	10219674	11954187	2 Primary Alcohol,1 Amide	3
Alt	Rha	10219674	25310	1 Primary Alcohol	1
Alt	RhaNAc	10219674	91807222	2 Primary Alcohol,1 Amide	3
Alt	Rib	10219674	10975657	1 Primary Alcohol	1
Alt	Sor	10219674	439192		0
Alt	Tag	10219674	439312		0
Alt	Tal	10219674	441035		0
Alt	TalA	10219674	11298488	1 Primary Alcohol,1 Carboxylic Acid	2
Alt	TalN	10219674	9834117	1 Primary Alcohol,1 Primary Amine	2
Alt	TalNAc	10219674	57376616	1 Primary Alcohol,1 Amide	2
Alt	Tyv	10219674	12303782	2 Primary Alcohol	2
Alt	Xyl	10219674	135191	1 Primary Alcohol	1
AltA	AltN	56845780	6602094	1 Carboxylic Acid,1 Primary Amine	2
AltA	AltNAc	56845780	44717159	1 Carboxylic Acid,1 Amide	2
AltA	Api	56845780	12306753	1 Carboxylic Acid	1
AltA	Ara	56845780	439195	1 Carboxylic Acid	1
AltA	Bac	56845780	54029194	2 Primary Alcohol,1 Carboxylic Acid,2 Primary Amine	4
AltA	Col	56845780	12303780	1 Primary Alcohol,1 Carboxylic Acid	2
AltA	DDmanHep	56845780	53681436	2 Primary Alcohol,1 Carboxylic Acid	3
AltA	Dha	56845780	15608515	1 Primary Alcohol,1 Carboxylic Acid	2
AltA	Dig	56845780	2723626	1 Primary Alcohol,1 Carboxylic Acid	2
AltA	Fru	56845780	2723872	1 Primary Alcohol,1 Carboxylic Acid	2
AltA	Fuc	56845780	17106	1 Carboxylic Acid	1
AltA	FucNAc	56845780	91810489	1 Primary Alcohol,1 Carboxylic Acid,1 Amide	3
AltA	Gal	56845780	6036	1 Primary Alcohol,1 Carboxylic Acid	2
AltA	GalA	56845780	439215		0
AltA	GalN	56845780	24154	1 Carboxylic Acid,1 Primary Amine	2
AltA	GalNAc	56845780	35717	1 Carboxylic Acid,1 Amide	2
AltA	Glc	56845780	5793	1 Primary Alcohol,1 Carboxylic Acid	2
AltA	GlcA	56845780	94715		0
AltA	GlcN	56845780	439213	1 Carboxylic Acid,1 Primary Amine	2
AltA	GlcNAc	56845780	439174	1 Carboxylic Acid,1 Amide	2
AltA	Gul	56845780	441033	1 Primary Alcohol,1 Carboxylic Acid	2
AltA	GulA	56845780	11788788		0
AltA	GulN	56845780	9920528	1 Carboxylic Acid,1 Primary Amine	2
AltA	GulNAc	56845780	13201633	1 Carboxylic Acid,1 Amide	2
AltA	Ido	56845780	11030410	1 Primary Alcohol,1 Carboxylic Acid	2
AltA	IdoA	56845780	441039		0
AltA	IdoN	56845780	91864695	1 Carboxylic Acid,1 Primary Amine	2
AltA	IdoNAc	56845780	13201636	1 Carboxylic Acid,1 Amide	2
AltA	Kdn	56845780	13991616	2 Primary Alcohol	2
AltA	Kdo	56845780	10857507	1 Primary Alcohol	1
AltA	Leg	56845780	70678967	1 Primary Alcohol,2 Primary Amine	3
AltA	LDmanHep	56845780	21120522	2 Primary Alcohol,1 Carboxylic Acid	3
AltA	Lyx	56845780	439240	1 Carboxylic Acid	1
AltA	Man	56845780	18950	1 Primary Alcohol,1 Carboxylic Acid	2
AltA	ManA	56845780	439630		0
AltA	ManN	56845780	440049	1 Carboxylic Acid,1 Primary Amine	2
AltA	ManNAc	56845780	439281	1 Carboxylic Acid,1 Amide	2
AltA	Mur	56845780	441038	1 Primary Alcohol,1 Primary Amine,1 Ether	3
AltA	MurNAc	56845780	5462244	1 Primary Alcohol,1 Amide,1 Ether	3
AltA	MurNGc	56845780	91810748	1 Amide,1 Ether	2
AltA	Neu	56845780	441037	1 Primary Alcohol,1 Primary Amine	2
AltA	Neu5Ac	56845780	439197	1 Primary Alcohol,1 Amide	2
AltA	Neu5Gc	56845780	440001	2 Primary Alcohol,1 Amide	3
AltA	Oli	56845780	10888063	1 Primary Alcohol,1 Carboxylic Acid	2
AltA	Par	56845780	12303783	1 Primary Alcohol,1 Carboxylic Acid	2
AltA	Pse	56845780	101137651	1 Primary Alcohol,2 Primary Amine	3
AltA	Psi	56845780	441036	1 Primary Alcohol,1 Carboxylic Acid	2
AltA	Qui	56845780	439746	1 Carboxylic Acid	1
AltA	QuiNAc	56845780	11954187	1 Primary Alcohol,1 Carboxylic Acid,1 Amide	3
AltA	Rha	56845780	25310	1 Carboxylic Acid	1
AltA	RhaNAc	56845780	91807222	1 Primary Alcohol,1 Carboxylic Acid,1 Amide	3
AltA	Rib	56845780	10975657	1 Carboxylic Acid	1
AltA	Sor	56845780	439192	1 Primary Alcohol,1 Carboxylic Acid	2
AltA	Tag	56845780	439312	1 Primary Alcohol,1 Carboxylic Acid	2
AltA	Tal	56845780	441035	1 Primary Alcohol,1 Carboxylic Acid	2
AltA	TalA	56845780	11298488		0
AltA	TalN	56845780	9834117	1 Carboxylic Acid,1 Primary Amine	2
AltA	TalNAc	56845780	57376616	1 Carboxylic Acid,1 Amide	2
AltA	Tyv	56845780	12303782	1 Primary Alcohol,1 Carboxylic Acid	2
AltA	Xyl	56845780	135191	1 Carboxylic Acid	1
AltN	AltNAc	6602094	44717159	1 Primary Amine,1 Amide	2
AltN	Api	6602094	12306753	1 Primary Amine	1
AltN	Ara	6602094	439195	1 Primary Amine	1
AltN	Bac	6602094	54029194	2 Primary Alcohol,1 Primary Amine	3
AltN	Col	6602094	12303780	1 Primary Alcohol,1 Primary Amine	2
AltN	DDmanHep	6602094	53681436	2 Primary Alcohol,1 Primary Amine	3
AltN	Dha	6602094	15608515	1 Primary Alcohol,2 Carboxylic Acid,1 Primary Amine	4
AltN	Dig	6602094	2723626	1 Primary Alcohol,1 Primary Amine	2
AltN	Fru	6602094	2723872	1 Primary Alcohol,1 Primary Amine	2
AltN	Fuc	6602094	17106	1 Primary Amine	1
AltN	FucNAc	6602094	91810489	1 Primary Alcohol,1 Primary Amine,1 Amide	3
AltN	Gal	6602094	6036	1 Primary Alcohol,1 Primary Amine	2
AltN	GalA	6602094	439215	1 Carboxylic Acid,1 Primary Amine	2
AltN	GalN	6602094	24154		0
AltN	GalNAc	6602094	35717	1 Primary Amine,1 Amide	2
AltN	Glc	6602094	5793	1 Primary Alcohol,1 Primary Amine	2
AltN	GlcA	6602094	94715	1 Carboxylic Acid,1 Primary Amine	2
AltN	GlcN	6602094	439213		0
AltN	GlcNAc	6602094	439174	1 Primary Amine,1 Amide	2
AltN	Gul	6602094	441033	1 Primary Alcohol,1 Primary Amine	2
AltN	GulA	6602094	11788788	1 Carboxylic Acid,1 Primary Amine	2
AltN	GulN	6602094	9920528		0
AltN	GulNAc	6602094	13201633	1 Primary Amine,1 Amide	2
AltN	Ido	6602094	11030410	1 Primary Alcohol,1 Primary Amine	2
AltN	IdoA	6602094	441039	1 Carboxylic Acid,1 Primary Amine	2
AltN	IdoN	6602094	91864695		0
AltN	IdoNAc	6602094	13201636	1 Primary Amine,1 Amide	2
AltN	Kdn	6602094	13991616	2 Primary Alcohol,1 Carboxylic Acid,1 Primary Amine	4
AltN	Kdo	6602094	10857507	1 Primary Alcohol,1 Carboxylic Acid,1 Primary Amine	3
AltN	Leg	6602094	70678967	1 Primary Alcohol,1 Carboxylic Acid,1 Primary Amine	3
AltN	LDmanHep	6602094	21120522	2 Primary Alcohol,1 Primary Amine	3
AltN	Lyx	6602094	439240	1 Primary Amine	1
AltN	Man	6602094	18950	1 Primary Alcohol,1 Primary Amine	2
AltN	ManA	6602094	439630	1 Carboxylic Acid,1 Primary Amine	2
AltN	ManN	6602094	440049		0
AltN	ManNAc	6602094	439281	1 Primary Amine,1 Amide	2
AltN	Mur	6602094	441038	1 Primary Alcohol,1 Carboxylic Acid,1 Ether	3
AltN	MurNAc	6602094	5462244	1 Primary Alcohol,1 Carboxylic Acid,1 Primary Amine,1 Amide,1 Ether	5
AltN	MurNGc	6602094	91810748	1 Carboxylic Acid,1 Primary Amine,1 Amide,1 Ether	4
AltN	Neu	6602094	441037	1 Primary Alcohol,1 Carboxylic Acid	2
AltN	Neu5Ac	6602094	439197	1 Primary Alcohol,1 Carboxylic Acid,1 Primary Amine,1 Amide	4
AltN	Neu5Gc	6602094	440001	2 Primary Alcohol,1 Carboxylic Acid,1 Primary Amine,1 Amide	5
AltN	Oli	6602094	10888063	1 Primary Alcohol,1 Primary Amine	2
AltN	Par	6602094	12303783	1 Primary Alcohol,1 Primary Amine	2
AltN	Pse	6602094	101137651	1 Primary Alcohol,1 Carboxylic Acid,1 Primary Amine	3
AltN	Psi	6602094	441036	1 Primary Alcohol,1 Primary Amine	2
AltN	Qui	6602094	439746	1 Primary Amine	1
AltN	QuiNAc	6602094	11954187	1 Primary Alcohol,1 Primary Amine,1 Amide	3
AltN	Rha	6602094	25310	1 Primary Amine	1
AltN	RhaNAc	6602094	91807222	1 Primary Alcohol,1 Primary Amine,1 Amide	3
AltN	Rib	6602094	10975657	1 Primary Amine	1
AltN	Sor	6602094	439192	1 Primary Alcohol,1 Primary Amine	2
AltN	Tag	6602094	439312	1 Primary Alcohol,1 Primary Amine	2
AltN	Tal	6602094	441035	1 Primary Alcohol,1 Primary Amine	2
AltN	TalA	6602094	11298488	1 Carboxylic Acid,1 Primary Amine	2
AltN	TalN	6602094	9834117		0
AltN	TalNAc	6602094	57376616	1 Primary Amine,1 Amide	2
AltN	Tyv	6602094	12303782	1 Primary Alcohol,1 Primary Amine	2
AltN	Xyl	6602094	135191	1 Primary Amine	1
AltNAc	Api	44717159	12306753	1 Amide	1
AltNAc	Ara	44717159	439195	1 Amide	1
AltNAc	Bac	44717159	54029194	2 Primary Alcohol,2 Primary Amine,1 Amide	5
AltNAc	Col	44717159	12303780	1 Primary Alcohol,1 Amide	2
AltNAc	DDmanHep	44717159	53681436	2 Primary Alcohol,1 Amide	3
AltNAc	Dha	44717159	15608515	1 Primary Alcohol,2 Carboxylic Acid,1 Amide	4
AltNAc	Dig	44717159	2723626	1 Primary Alcohol,1 Amide	2
AltNAc	Fru	44717159	2723872	1 Primary Alcohol,1 Amide	2
AltNAc	Fuc	44717159	17106	1 Amide	1
AltNAc	FucNAc	44717159	91810489	1 Primary Alcohol	1
AltNAc	Gal	44717159	6036	1 Primary Alcohol,1 Amide	2
AltNAc	GalA	44717159	439215	1 Carboxylic Acid,1 Amide	2
AltNAc	GalN	44717159	24154	1 Primary Amine,1 Amide	2
AltNAc	GalNAc	44717159	35717		0
AltNAc	Glc	44717159	5793	1 Primary Alcohol,1 Amide	2
AltNAc	GlcA	44717159	94715	1 Carboxylic Acid,1 Amide	2
AltNAc	GlcN	44717159	439213	1 Primary Amine,1 Amide	2
AltNAc	GlcNAc	44717159	439174		0
AltNAc	Gul	44717159	441033	1 Primary Alcohol,1 Amide	2
AltNAc	GulA	44717159	11788788	1 Carboxylic Acid,1 Amide	2
AltNAc	GulN	44717159	9920528	1 Primary Amine,1 Amide	2
AltNAc	GulNAc	44717159	13201633		0
AltNAc	Ido	44717159	11030410	1 Primary Alcohol,1 Amide	2
AltNAc	IdoA	44717159	441039	1 Carboxylic Acid,1 Amide	2
AltNAc	IdoN	44717159	91864695	1 Primary Amine,1 Amide	2
AltNAc	IdoNAc	44717159	13201636		0
AltNAc	Kdn	44717159	13991616	2 Primary Alcohol,1 Carboxylic Acid,1 Amide	4
AltNAc	Kdo	44717159	10857507	1 Primary Alcohol,1 Carboxylic Acid,1 Amide	3
AltNAc	Leg	44717159	70678967	1 Primary Alcohol,1 Carboxylic Acid,1 Primary Amine,1 Amide	4
AltNAc	LDmanHep	44717159	21120522	2 Primary Alcohol,1 Amide	3
AltNAc	Lyx	44717159	439240	1 Amide	1
AltNAc	Man	44717159	18950	1 Primary Alcohol,1 Amide	2
AltNAc	ManA	44717159	439630	1 Carboxylic Acid,1 Amide	2
AltNAc	ManN	44717159	440049	1 Primary Amine,1 Amide	2
AltNAc	ManNAc	44717159	439281		0
AltNAc	Mur	44717159	441038	1 Primary Alcohol,1 Carboxylic Acid,1 Primary Amine,1 Amide,1 Ether	5
AltNAc	MurNAc	44717159	5462244	1 Primary Alcohol,1 Carboxylic Acid,1 Ether	3
AltNAc	MurNGc	44717159	91810748	1 Carboxylic Acid,1 Amide,1 Ether	3
AltNAc	Neu	44717159	441037	1 Primary Alcohol,1 Carboxylic Acid,1 Primary Amine,1 Amide	4
AltNAc	Neu5Ac	44717159	439197	1 Primary Alcohol,1 Carboxylic Acid	2
AltNAc	Neu5Gc	44717159	440001	2 Primary Alcohol,1 Carboxylic Acid	3
AltNAc	Oli	44717159	10888063	1 Primary Alcohol,1 Amide	2
AltNAc	Par	44717159	12303783	1 Primary Alcohol,1 Amide	2
AltNAc	Pse	44717159	101137651	1 Primary Alcohol,1 Carboxylic Acid,1 Primary Amine,1 Amide	4
AltNAc	Psi	44717159	441036	1 Primary Alcohol,1 Amide	2
AltNAc	Qui	44717159	439746	1 Amide	1
AltNAc	QuiNAc	44717159	11954187	1 Primary Alcohol	1
AltNAc	Rha	44717159	25310	1 Amide	1
AltNAc	RhaNAc	44717159	91807222	1 Primary Alcohol	1
AltNAc	Rib	44717159	10975657	1 Amide	1
AltNAc	Sor	44717159	439192	1 Primary Alcohol,1 Amide	2
AltNAc	Tag	44717159	439312	1 Primary Alcohol,1 Amide	2
AltNAc	Tal	44717159	441035	1 Primary Alcohol,1 Amide	2
AltNAc	TalA	44717159	11298488	1 Carboxylic Acid,1 Amide	2
AltNAc	TalN	44717159	9834117	1 Primary Amine,1 Amide	2
AltNAc	TalNAc	44717159	57376616		0
AltNAc	Tyv	44717159	12303782	1 Primary Alcohol,1 Amide	2
AltNAc	Xyl	44717159	135191	1 Amide	1
Api	Ara	12306753	439195		0
Api	Bac	12306753	54029194	2 Primary Alcohol,2 Primary Amine	4
Api	Col	12306753	12303780	1 Primary Alcohol	1
Api	DDmanHep	12306753	53681436	2 Primary Alcohol	2
Api	Dha	12306753	15608515	1 Primary Alcohol,2 Carboxylic Acid	3
Api	Dig	12306753	2723626	1 Primary Alcohol	1
Api	Fru	12306753	2723872	1 Primary Alcohol	1
Api	Fuc	12306753	17106		0
Api	FucNAc	12306753	91810489	1 Primary Alcohol,1 Amide	2
Api	Gal	12306753	6036	1 Primary Alcohol	1
Api	GalA	12306753	439215	1 Carboxylic Acid	1
Api	GalN	12306753	24154	1 Primary Amine	1
Api	GalNAc	12306753	35717	1 Amide	1
Api	Glc	12306753	5793	1 Primary Alcohol	1
Api	GlcA	12306753	94715	1 Carboxylic Acid	1
Api	GlcN	12306753	439213	1 Primary Amine	1
Api	GlcNAc	12306753	439174	1 Amide	1
Api	Gul	12306753	441033	1 Primary Alcohol	1
Api	GulA	12306753	11788788	1 Carboxylic Acid	1
Api	GulN	12306753	9920528	1 Primary Amine	1
Api	GulNAc	12306753	13201633	1 Amide	1
Api	Ido	12306753	11030410	1 Primary Alcohol	1
Api	IdoA	12306753	441039	1 Carboxylic Acid	1
Api	IdoN	12306753	91864695	1 Primary Amine	1
Api	IdoNAc	12306753	13201636	1 Amide	1
Api	Kdn	12306753	13991616	2 Primary Alcohol,1 Carboxylic Acid	3
Api	Kdo	12306753	10857507	1 Primary Alcohol,1 Carboxylic Acid	2
Api	Leg	12306753	70678967	1 Primary Alcohol,1 Carboxylic Acid,2 Primary Amine	4
Api	LDmanHep	12306753	21120522	2 Primary Alcohol	2
Api	Lyx	12306753	439240		0
Api	Man	12306753	18950	1 Primary Alcohol	1
Api	ManA	12306753	439630	1 Carboxylic Acid	1
Api	ManN	12306753	440049	1 Primary Amine	1
Api	ManNAc	12306753	439281	1 Amide	1
Api	Mur	12306753	441038	1 Primary Alcohol,1 Carboxylic Acid,1 Primary Amine,1 Ether	4
Api	MurNAc	12306753	5462244	1 Primary Alcohol,1 Carboxylic Acid,1 Amide,1 Ether	4
Api	MurNGc	12306753	91810748	1 Carboxylic Acid,1 Amide,1 Ether	3
Api	Neu	12306753	441037	1 Primary Alcohol,1 Carboxylic Acid,1 Primary Amine	3
Api	Neu5Ac	12306753	439197	1 Primary Alcohol,1 Carboxylic Acid,1 Amide	3
Api	Neu5Gc	12306753	440001	2 Primary Alcohol,1 Carboxylic Acid,1 Amide	4
Api	Oli	12306753	10888063	1 Primary Alcohol	1
Api	Par	12306753	12303783	1 Primary Alcohol	1
Api	Pse	12306753	101137651	1 Primary Alcohol,1 Carboxylic Acid,2 Primary Amine	4
Api	Psi	12306753	441036	1 Primary Alcohol	1
Api	Qui	12306753	439746		0
Api	QuiNAc	12306753	11954187	1 Primary Alcohol,1 Amide	2
Api	Rha	12306753	25310		0
Api	RhaNAc	12306753	91807222	1 Primary Alcohol,1 Amide	2
Api	Rib	12306753	10975657		0
Api	Sor	12306753	439192	1 Primary Alcohol	1
Api	Tag	12306753	439312	1 Primary Alcohol	1
Api	Tal	12306753	441035	1 Primary Alcohol	1
Api	TalA	12306753	11298488	1 Carboxylic Acid	1
Api	TalN	12306753	9834117	1 Primary Amine	1
Api	TalNAc	12306753	57376616	1 Amide	1
Api	Tyv	12306753	12303782	1 Primary Alcohol	1
Api	Xyl	12306753	135191		0
Ara	Bac	439195	54029194	2 Primary Alcohol,2 Primary Amine	4
Ara	Col	439195	12303780	1 Primary Alcohol	1
Ara	DDmanHep	439195	53681436	2 Primary Alcohol	2
Ara	Dha	439195	15608515	1 Primary Alcohol,2 Carboxylic Acid	3
Ara	Dig	439195	2723626	1 Primary Alcohol	1
Ara	Fru	439195	2723872	1 Primary Alcohol	1
Ara	Fuc	439195	17106		0
Ara	FucNAc	439195	91810489	1 Primary Alcohol,1 Amide	2
Ara	Gal	439195	6036	1 Primary Alcohol	1
Ara	GalA	439195	439215	1 Carboxylic Acid	1
Ara	GalN	439195	24154	1 Primary Amine	1
Ara	GalNAc	439195	35717	1 Amide	1
Ara	Glc	439195	5793	1 Primary Alcohol	1
Ara	GlcA	439195	94715	1 Carboxylic Acid	1
Ara	GlcN	439195	439213	1 Primary Amine	1
Ara	GlcNAc	439195	439174	1 Amide	1
Ara	Gul	439195	441033	1 Primary Alcohol	1
Ara	GulA	439195	11788788	1 Carboxylic Acid	1
Ara	GulN	439195	9920528	1 Primary Amine	1
Ara	GulNAc	439195	13201633	1 Amide	1
Ara	Ido	439195	11030410	1 Primary Alcohol	1
Ara	IdoA	439195	441039	1 Carboxylic Acid	1
Ara	IdoN	439195	91864695	1 Primary Amine	1
Ara	IdoNAc	439195	13201636	1 Amide	1
Ara	Kdn	439195	13991616	2 Primary Alcohol,1 Carboxylic Acid	3
Ara	Kdo	439195	10857507	1 Primary Alcohol,1 Carboxylic Acid	2
Ara	Leg	439195	70678967	1 Primary Alcohol,1 Carboxylic Acid,2 Primary Amine	4
Ara	LDmanHep	439195	21120522	2 Primary Alcohol	2
Ara	Lyx	439195	439240		0
Ara	Man	439195	18950	1 Primary Alcohol	1
Ara	ManA	439195	439630	1 Carboxylic Acid	1
Ara	ManN	439195	440049	1 Primary Amine	1
Ara	ManNAc	439195	439281	1 Amide	1
Ara	Mur	439195	441038	1 Primary Alcohol,1 Carboxylic Acid,1 Primary Amine,1 Ether	4
Ara	MurNAc	439195	5462244	1 Primary Alcohol,1 Carboxylic Acid,1 Amide,1 Ether	4
Ara	MurNGc	439195	91810748	1 Carboxylic Acid,1 Amide,1 Ether	3
Ara	Neu	439195	441037	1 Primary Alcohol,1 Carboxylic Acid,1 Primary Amine	3
Ara	Neu5Ac	439195	439197	1 Primary Alcohol,1 Carboxylic Acid,1 Amide	3
Ara	Neu5Gc	439195	440001	2 Primary Alcohol,1 Carboxylic Acid,1 Amide	4
Ara	Oli	439195	10888063	1 Primary Alcohol	1
Ara	Par	439195	12303783	1 Primary Alcohol	1
Ara	Pse	439195	101137651	1 Primary Alcohol,1 Carboxylic Acid,2 Primary Amine	4
Ara	Psi	439195	441036	1 Primary Alcohol	1
Ara	Qui	439195	439746		0
Ara	QuiNAc	439195	11954187	1 Primary Alcohol,1 Amide	2
Ara	Rha	439195	25310		0
Ara	RhaNAc	439195	91807222	1 Primary Alcohol,1 Amide	2
Ara	Rib	439195	10975657		0
Ara	Sor	439195	439192	1 Primary Alcohol	1
Ara	Tag	439195	439312	1 Primary Alcohol	1
Ara	Tal	439195	441035	1 Primary Alcohol	1
Ara	TalA	439195	11298488	1 Carboxylic Acid	1
Ara	TalN	439195	9834117	1 Primary Amine	1
Ara	TalNAc	439195	57376616	1 Amide	1
Ara	Tyv	439195	12303782	1 Primary Alcohol	1
Ara	Xyl	439195	135191		0
Bac	Col	54029194	12303780	1 Primary Alcohol,2 Primary Amine	3
Bac	DDmanHep	54029194	53681436	4 Primary Alcohol,2 Primary Amine	6
Bac	Dha	54029194	15608515	1 Primary Alcohol,1 Carboxylic Acid,2 Primary Amine	4
Bac	Dig	54029194	2723626	1 Primary Alcohol,2 Primary Amine	3
Bac	Fru	54029194	2723872	3 Primary Alcohol,2 Primary Amine	5
Bac	Fuc	54029194	17106	2 Primary Alcohol,2 Primary Amine	4
Bac	FucNAc	54029194	91810489	1 Primary Alcohol,2 Primary Amine,1 Amide	4
Bac	Gal	54029194	6036	3 Primary Alcohol,2 Primary Amine	5
Bac	GalA	54029194	439215	2 Primary Alcohol,1 Carboxylic Acid,2 Primary Amine	5
Bac	GalN	54029194	24154	2 Primary Alcohol,1 Primary Amine	3
Bac	GalNAc	54029194	35717	2 Primary Alcohol,2 Primary Amine,1 Amide	5
Bac	Glc	54029194	5793	3 Primary Alcohol,2 Primary Amine	5
Bac	GlcA	54029194	94715	2 Primary Alcohol,1 Carboxylic Acid,2 Primary Amine	5
Bac	GlcN	54029194	439213	2 Primary Alcohol,1 Primary Amine	3
Bac	GlcNAc	54029194	439174	2 Primary Alcohol,2 Primary Amine,1 Amide	5
Bac	Gul	54029194	441033	3 Primary Alcohol,2 Primary Amine	5
Bac	GulA	54029194	11788788	2 Primary Alcohol,1 Carboxylic Acid,2 Primary Amine	5
Bac	GulN	54029194	9920528	2 Primary Alcohol,1 Primary Amine	3
Bac	GulNAc	54029194	13201633	2 Primary Alcohol,2 Primary Amine,1 Amide	5
Bac	Ido	54029194	11030410	3 Primary Alcohol,2 Primary Amine	5
Bac	IdoA	54029194	441039	2 Primary Alcohol,1 Carboxylic Acid,2 Primary Amine	5
Bac	IdoN	54029194	91864695	2 Primary Alcohol,1 Primary Amine	3
Bac	IdoNAc	54029194	13201636	2 Primary Alcohol,2 Primary Amine,1 Amide	5
Bac	Kdn	54029194	13991616	4 Primary Alcohol,1 Carboxylic Acid,2 Primary Amine	7
Bac	Kdo	54029194	10857507	3 Primary Alcohol,1 Carboxylic Acid,2 Primary Amine	6
Bac	Leg	54029194	70678967	1 Primary Alcohol,1 Carboxylic Acid	2
Bac	LDmanHep	54029194	21120522	4 Primary Alcohol,2 Primary Amine	6
Bac	Lyx	54029194	439240	2 Primary Alcohol,2 Primary Amine	4
Bac	Man	54029194	18950	3 Primary Alcohol,2 Primary Amine	5
Bac	ManA	54029194	439630	2 Primary Alcohol,1 Carboxylic Acid,2 Primary Amine	5
Bac	ManN	54029194	440049	2 Primary Alcohol,1 Primary Amine	3
Bac	ManNAc	54029194	439281	2 Primary Alcohol,2 Primary Amine,1 Amide	5
Bac	Mur	54029194	441038	1 Primary Alcohol,1 Carboxylic Acid,1 Primary Amine,1 Ether	4
Bac	MurNAc	54029194	5462244	1 Primary Alcohol,1 Carboxylic Acid,2 Primary Amine,1 Amide,1 Ether	6
Bac	MurNGc	54029194	91810748	2 Primary Alcohol,1 Carboxylic Acid,2 Primary Amine,1 Amide,1 Ether	7
Bac	Neu	54029194	441037	3 Primary Alcohol,1 Carboxylic Acid,1 Primary Amine	5
Bac	Neu5Ac	54029194	439197	3 Primary Alcohol,1 Carboxylic Acid,2 Primary Amine,1 Amide	7
Bac	Neu5Gc	54029194	440001	4 Primary Alcohol,1 Carboxylic Acid,2 Primary Amine,1 Amide	8
Bac	Oli	54029194	10888063	1 Primary Alcohol,2 Primary Amine	3
Bac	Par	54029194	12303783	1 Primary Alcohol,2 Primary Amine	3
Bac	Pse	54029194	101137651	1 Primary Alcohol,1 Carboxylic Acid	2
Bac	Psi	54029194	441036	3 Primary Alcohol,2 Primary Amine	5
Bac	Qui	54029194	439746	2 Primary Alcohol,2 Primary Amine	4
Bac	QuiNAc	54029194	11954187	1 Primary Alcohol,2 Primary Amine,1 Amide	4
Bac	Rha	54029194	25310	2 Primary Alcohol,2 Primary Amine	4
Bac	RhaNAc	54029194	91807222	1 Primary Alcohol,2 Primary Amine,1 Amide	4
Bac	Rib	54029194	10975657	2 Primary Alcohol,2 Primary Amine	4
Bac	Sor	54029194	439192	3 Primary Alcohol,2 Primary Amine	5
Bac	Tag	54029194	439312	3 Primary Alcohol,2 Primary Amine	5
Bac	Tal	54029194	441035	3 Primary Alcohol,2 Primary Amine	5
Bac	TalA	54029194	11298488	2 Primary Alcohol,1 Carboxylic Acid,2 Primary Amine	5
Bac	TalN	54029194	9834117	2 Primary Alcohol,1 Primary Amine	3
Bac	TalNAc	54029194	57376616	2 Primary Alcohol,2 Primary Amine,1 Amide	5
Bac	Tyv	54029194	12303782	1 Primary Alcohol,2 Primary Amine	3
Bac	Xyl	54029194	135191	2 Primary Alcohol,2 Primary Amine	4
Col	DDmanHep	12303780	53681436	3 Primary Alcohol	3
Col	Dha	12303780	15608515	2 Carboxylic Acid	2
Col	Dig	12303780	2723626		0
Col	Fru	12303780	2723872	2 Primary Alcohol	2
Col	Fuc	12303780	17106	1 Primary Alcohol	1
Col	FucNAc	12303780	91810489	1 Amide	1
Col	Gal	12303780	6036	2 Primary Alcohol	2
Col	GalA	12303780	439215	1 Primary Alcohol,1 Carboxylic Acid	2
Col	GalN	12303780	24154	1 Primary Alcohol,1 Primary Amine	2
Col	GalNAc	12303780	35717	1 Primary Alcohol,1 Amide	2
Col	Glc	12303780	5793	2 Primary Alcohol	2
Col	GlcA	12303780	94715	1 Primary Alcohol,1 Carboxylic Acid	2
Col	GlcN	12303780	439213	1 Primary Alcohol,1 Primary Amine	2
Col	GlcNAc	12303780	439174	1 Primary Alcohol,1 Amide	2
Col	Gul	12303780	441033	2 Primary Alcohol	2
Col	GulA	12303780	11788788	1 Primary Alcohol,1 Carboxylic Acid	2
Col	GulN	12303780	9920528	1 Primary Alcohol,1 Primary Amine	2
Col	GulNAc	12303780	13201633	1 Primary Alcohol,1 Amide	2
Col	Ido	12303780	11030410	2 Primary Alcohol	2
Col	IdoA	12303780	441039	1 Primary Alcohol,1 Carboxylic Acid	2
Col	IdoN	12303780	91864695	1 Primary Alcohol,1 Primary Amine	2
Col	IdoNAc	12303780	13201636	1 Primary Alcohol,1 Amide	2
Col	Kdn	12303780	13991616	3 Primary Alcohol,1 Carboxylic Acid	4
Col	Kdo	12303780	10857507	2 Primary Alcohol,1 Carboxylic Acid	3
Col	Leg	12303780	70678967	1 Carboxylic Acid,2 Primary Amine	3
Col	LDmanHep	12303780	21120522	3 Primary Alcohol	3
Col	Lyx	12303780	439240	1 Primary Alcohol	1
Col	Man	12303780	18950	2 Primary Alcohol	2
Col	ManA	12303780	439630	1 Primary Alcohol,1 Carboxylic Acid	2
Col	ManN	12303780	440049	1 Primary Alcohol,1 Primary Amine	2
Col	ManNAc	12303780	439281	1 Primary Alcohol,1 Amide	2
Col	Mur	12303780	441038	1 Carboxylic Acid,1 Primary Amine,1 Ether	3
Col	MurNAc	12303780	5462244	1 Carboxylic Acid,1 Amide,1 Ether	3
Col	MurNGc	12303780	91810748	1 Primary Alcohol,1 Carboxylic Acid,1 Amide,1 Ether	4
Col	Neu	12303780	441037	2 Primary Alcohol,1 Carboxylic Acid,1 Primary Amine	4
Col	Neu5Ac	12303780	439197	2 Primary Alcohol,1 Carboxylic Acid,1 Amide	4
Col	Neu5Gc	12303780	440001	3 Primary Alcohol,1 Carboxylic Acid,1 Amide	5
Col	Oli	12303780	10888063		0
Col	Par	12303780	12303783		0
Col	Pse	12303780	101137651	1 Carboxylic Acid,2 Primary Amine	3
Col	Psi	12303780	441036	2 Primary Alcohol	2
Col	Qui	12303780	439746	1 Primary Alcohol	1
Col	QuiNAc	12303780	11954187	1 Amide	1
Col	Rha	12303780	25310	1 Primary Alcohol	1
Col	RhaNAc	12303780	91807222	1 Amide	1
Col	Rib	12303780	10975657	1 Primary Alcohol	1
Col	Sor	12303780	439192	2 Primary Alcohol	2
Col	Tag	12303780	439312	2 Primary Alcohol	2
Col	Tal	12303780	441035	2 Primary Alcohol	2
Col	TalA	12303780	11298488	1 Primary Alcohol,1 Carboxylic Acid	2
Col	TalN	12303780	9834117	1 Primary Alcohol,1 Primary Amine	2
Col	TalNAc	12303780	57376616	1 Primary Alcohol,1 Amide	2
Col	Tyv	12303780	12303782		0
Col	Xyl	12303780	135191	1 Primary Alcohol	1
DDmanHep	Dha	53681436	15608515	3 Primary Alcohol,2 Carboxylic Acid	5
DDmanHep	Dig	53681436	2723626	3 Primary Alcohol	3
DDmanHep	Fru	53681436	2723872	1 Primary Alcohol	1
DDmanHep	Fuc	53681436	17106	2 Primary Alcohol	2
DDmanHep	FucNAc	53681436	91810489	3 Primary Alcohol,1 Amide	4
DDmanHep	Gal	53681436	6036	1 Primary Alcohol	1
DDmanHep	GalA	53681436	439215	2 Primary Alcohol,1 Carboxylic Acid	3
DDmanHep	GalN	53681436	24154	2 Primary Alcohol,1 Primary Amine	3
DDmanHep	GalNAc	53681436	35717	2 Primary Alcohol,1 Amide	3
DDmanHep	Glc	53681436	5793	1 Primary Alcohol	1
DDmanHep	GlcA	53681436	94715	2 Primary Alcohol,1 Carboxylic Acid	3
DDmanHep	GlcN	53681436	439213	2 Primary Alcohol,1 Primary Amine	3
DDmanHep	GlcNAc	53681436	439174	2 Primary Alcohol,1 Amide	3
DDmanHep	Gul	53681436	441033	1 Primary Alcohol	1
DDmanHep	GulA	53681436	11788788	2 Primary Alcohol,1 Carboxylic Acid	3
DDmanHep	GulN	53681436	9920528	2 Primary Alcohol,1 Primary Amine	3
DDmanHep	GulNAc	53681436	13201633	2 Primary Alcohol,1 Amide	3
DDmanHep	Ido	53681436	11030410	1 Primary Alcohol	1
DDmanHep	IdoA	53681436	441039	2 Primary Alcohol,1 Carboxylic Acid	3
DDmanHep	IdoN	53681436	91864695	2 Primary Alcohol,1 Primary Amine	3
DDmanHep	IdoNAc	53681436	13201636	2 Primary Alcohol,1 Amide	3
DDmanHep	Kdn	53681436	13991616	1 Carboxylic Acid	1
DDmanHep	Kdo	53681436	10857507	1 Primary Alcohol,1 Carboxylic Acid	2
DDmanHep	Leg	53681436	70678967	3 Primary Alcohol,1 Carboxylic Acid,2 Primary Amine	6
DDmanHep	LDmanHep	53681436	21120522		0
DDmanHep	Lyx	53681436	439240	2 Primary Alcohol	2
DDmanHep	Man	53681436	18950	1 Primary Alcohol	1
DDmanHep	ManA	53681436	439630	2 Primary Alcohol,1 Carboxylic Acid	3
DDmanHep	ManN	53681436	440049	2 Primary Alcohol,1 Primary Amine	3
DDmanHep	ManNAc	53681436	439281	2 Primary Alcohol,1 Amide	3
DDmanHep	Mur	53681436	441038	3 Primary Alcohol,1 Carboxylic Acid,1 Primary Amine,1 Ether	6
DDmanHep	MurNAc	53681436	5462244	3 Primary Alcohol,1 Carboxylic Acid,1 Amide,1 Ether	6
DDmanHep	MurNGc	53681436	91810748	2 Primary Alcohol,1 Carboxylic Acid,1 Amide,1 Ether	5
DDmanHep	Neu	53681436	441037	1 Primary Alcohol,1 Carboxylic Acid,1 Primary Amine	3
DDmanHep	Neu5Ac	53681436	439197	1 Primary Alcohol,1 Carboxylic Acid,1 Amide	3
DDmanHep	Neu5Gc	53681436	440001	1 Carboxylic Acid,1 Amide	2
DDmanHep	Oli	53681436	10888063	3 Primary Alcohol	3
DDmanHep	Par	53681436	12303783	3 Primary Alcohol	3
DDmanHep	Pse	53681436	101137651	3 Primary Alcohol,1 Carboxylic Acid,2 Primary Amine	6
DDmanHep	Psi	53681436	441036	1 Primary Alcohol	1
DDmanHep	Qui	53681436	439746	2 Primary Alcohol	2
DDmanHep	QuiNAc	53681436	11954187	3 Primary Alcohol,1 Amide	4
DDmanHep	Rha	53681436	25310	2 Primary Alcohol	2
DDmanHep	RhaNAc	53681436	91807222	3 Primary Alcohol,1 Amide	4
DDmanHep	Rib	53681436	10975657	2 Primary Alcohol	2
DDmanHep	Sor	53681436	439192	1 Primary Alcohol	1
DDmanHep	Tag	53681436	439312	1 Primary Alcohol	1
DDmanHep	Tal	53681436	441035	1 Primary Alcohol	1
DDmanHep	TalA	53681436	11298488	2 Primary Alcohol,1 Carboxylic Acid	3
DDmanHep	TalN	53681436	9834117	2 Primary Alcohol,1 Primary Amine	3
DDmanHep	TalNAc	53681436	57376616	2 Primary Alcohol,1 Amide	3
DDmanHep	Tyv	53681436	12303782	3 Primary Alcohol	3
DDmanHep	Xyl	53681436	135191	2 Primary Alcohol	2
Dha	Dig	15608515	2723626	2 Carboxylic Acid	2
Dha	Fru	15608515	2723872	2 Primary Alcohol,2 Carboxylic Acid	4
Dha	Fuc	15608515	17106	1 Primary Alcohol,2 Carboxylic Acid	3
Dha	FucNAc	15608515	91810489	2 Carboxylic Acid,1 Amide	3
Dha	Gal	15608515	6036	2 Primary Alcohol,2 Carboxylic Acid	4
Dha	GalA	15608515	439215	1 Primary Alcohol,1 Carboxylic Acid	2
Dha	GalN	15608515	24154	1 Primary Alcohol,2 Carboxylic Acid,1 Primary Amine	4
Dha	GalNAc	15608515	35717	1 Primary Alcohol,2 Carboxylic Acid,1 Amide	4
Dha	Glc	15608515	5793	2 Primary Alcohol,2 Carboxylic Acid	4
Dha	GlcA	15608515	94715	1 Primary Alcohol,1 Carboxylic Acid	2
Dha	GlcN	15608515	439213	1 Primary Alcohol,2 Carboxylic Acid,1 Primary Amine	4
Dha	GlcNAc	15608515	439174	1 Primary Alcohol,2 Carboxylic Acid,1 Amide	4
Dha	Gul	15608515	441033	2 Primary Alcohol,2 Carboxylic Acid	4
Dha	GulA	15608515	11788788	1 Primary Alcohol,1 Carboxylic Acid	2
Dha	GulN	15608515	9920528	1 Primary Alcohol,2 Carboxylic Acid,1 Primary Amine	4
Dha	GulNAc	15608515	13201633	1 Primary Alcohol,2 Carboxylic Acid,1 Amide	4
Dha	Ido	15608515	11030410	2 Primary Alcohol,2 Carboxylic Acid	4
Dha	IdoA	15608515	441039	1 Primary Alcohol,1 Carboxylic Acid	2
Dha	IdoN	15608515	91864695	1 Primary Alcohol,2 Carboxylic Acid,1 Primary Amine	4
Dha	IdoNAc	15608515	13201636	1 Primary Alcohol,2 Carboxylic Acid,1 Amide	4
Dha	Kdn	15608515	13991616	3 Primary Alcohol,1 Carboxylic Acid	4
Dha	Kdo	15608515	10857507	2 Primary Alcohol,1 Carboxylic Acid	3
Dha	Leg	15608515	70678967	1 Carboxylic Acid,2 Primary Amine	3
Dha	LDmanHep	15608515	21120522	3 Primary Alcohol,2 Carboxylic Acid	5
Dha	Lyx	15608515	439240	1 Primary Alcohol,2 Carboxylic Acid	3
Dha	Man	15608515	18950	2 Primary Alcohol,2 Carboxylic Acid	4
Dha	ManA	15608515	439630	1 Primary Alcohol,1 Carboxylic Acid	2
Dha	ManN	15608515	440049	1 Primary Alcohol,2 Carboxylic Acid,1 Primary Amine	4
Dha	ManNAc	15608515	439281	1 Primary Alcohol,2 Carboxylic Acid,1 Amide	4
Dha	Mur	15608515	441038	1 Carboxylic Acid,1 Primary Amine,1 Ether	3
Dha	MurNAc	15608515	5462244	1 Carboxylic Acid,1 Amide,1 Ether	3
Dha	MurNGc	15608515	91810748	1 Primary Alcohol,1 Carboxylic Acid,1 Amide,1 Ether	4
Dha	Neu	15608515	441037	2 Primary Alcohol,1 Carboxylic Acid,1 Primary Amine	4
Dha	Neu5Ac	15608515	439197	2 Primary Alcohol,1 Carboxylic Acid,1 Amide	4
Dha	Neu5Gc	15608515	440001	3 Primary Alcohol,1 Carboxylic Acid,1 Amide	5
Dha	Oli	15608515	10888063	2 Carboxylic Acid	2
Dha	Par	15608515	12303783	2 Carboxylic Acid	2
Dha	Pse	15608515	101137651	1 Carboxylic Acid,2 Primary Amine	3
Dha	Psi	15608515	441036	2 Primary Alcohol,2 Carboxylic Acid	4
Dha	Qui	15608515	439746	1 Primary Alcohol,2 Carboxylic Acid	3
Dha	QuiNAc	15608515	11954187	2 Carboxylic Acid,1 Amide	3
Dha	Rha	15608515	25310	1 Primary Alcohol,2 Carboxylic Acid	3
Dha	RhaNAc	15608515	91807222	2 Carboxylic Acid,1 Amide	3
Dha	Rib	15608515	10975657	1 Primary Alcohol,2 Carboxylic Acid	3
Dha	Sor	15608515	439192	2 Primary Alcohol,2 Carboxylic Acid	4
Dha	Tag	15608515	439312	2 Primary Alcohol,2 Carboxylic Acid	4
Dha	Tal	15608515	441035	2 Primary Alcohol,2 Carboxylic Acid	4
Dha	TalA	15608515	11298488	1 Primary Alcohol,1 Carboxylic Acid	2
Dha	TalN	15608515	9834117	1 Primary Alcohol,2 Carboxylic Acid,1 Primary Amine	4
Dha	TalNAc	15608515	57376616	1 Primary Alcohol,2 Carboxylic Acid,1 Amide	4
Dha	Tyv	15608515	12303782	2 Carboxylic Acid	2
Dha	Xyl	15608515	135191	1 Primary Alcohol,2 Carboxylic Acid	3
Dig	Fru	2723626	2723872	2 Primary Alcohol	2
Dig	Fuc	2723626	17106	1 Primary Alcohol	1
Dig	FucNAc	2723626	91810489	1 Amide	1
Dig	Gal	2723626	6036	2 Primary Alcohol	2
Dig	GalA	2723626	439215	1 Primary Alcohol,1 Carboxylic Acid	2
Dig	GalN	2723626	24154	1 Primary Alcohol,1 Primary Amine	2
Dig	GalNAc	2723626	35717	1 Primary Alcohol,1 Amide	2
Dig	Glc	2723626	5793	2 Primary Alcohol	2
Dig	GlcA	2723626	94715	1 Primary Alcohol,1 Carboxylic Acid	2
Dig	GlcN	2723626	439213	1 Primary Alcohol,1 Primary Amine	2
Dig	GlcNAc	2723626	439174	1 Primary Alcohol,1 Amide	2
Dig	Gul	2723626	441033	2 Primary Alcohol	2
Dig	GulA	2723626	11788788	1 Primary Alcohol,1 Carboxylic Acid	2
Dig	GulN	2723626	9920528	1 Primary Alcohol,1 Primary Amine	2
Dig	GulNAc	2723626	13201633	1 Primary Alcohol,1 Amide	2
Dig	Ido	2723626	11030410	2 Primary Alcohol	2
Dig	IdoA	2723626	441039	1 Primary Alcohol,1 Carboxylic Acid	2
Dig	IdoN	2723626	91864695	1 Primary Alcohol,1 Primary Amine	2
Dig	IdoNAc	2723626	13201636	1 Primary Alcohol,1 Amide	2
Dig	Kdn	2723626	13991616	3 Primary Alcohol,1 Carboxylic Acid	4
Dig	Kdo	2723626	10857507	2 Primary Alcohol,1 Carboxylic Acid	3
Dig	Leg	2723626	70678967	1 Carboxylic Acid,2 Primary Amine	3
Dig	LDmanHep	2723626	21120522	3 Primary Alcohol	3
Dig	Lyx	2723626	439240	1 Primary Alcohol	1
Dig	Man	2723626	18950	2 Primary Alcohol	2
Dig	ManA	2723626	439630	1 Primary Alcohol,1 Carboxylic Acid	2
Dig	ManN	2723626	440049	1 Primary Alcohol,1 Primary Amine	2
Dig	ManNAc	2723626	439281	1 Primary Alcohol,1 Amide	2
Dig	Mur	2723626	441038	1 Carboxylic Acid,1 Primary Amine,1 Ether	3
Dig	MurNAc	2723626	5462244	1 Carboxylic Acid,1 Amide,1 Ether	3
Dig	MurNGc	2723626	91810748	1 Primary Alcohol,1 Carboxylic Acid,1 Amide,1 Ether	4
Dig	Neu	2723626	441037	2 Primary Alcohol,1 Carboxylic Acid,1 Primary Amine	4
Dig	Neu5Ac	2723626	439197	2 Primary Alcohol,1 Carboxylic Acid,1 Amide	4
Dig	Neu5Gc	2723626	440001	3 Primary Alcohol,1 Carboxylic Acid,1 Amide	5
Dig	Oli	2723626	10888063		0
Dig	Par	2723626	12303783		0
Dig	Pse	2723626	101137651	1 Carboxylic Acid,2 Primary Amine	3
Dig	Psi	2723626	441036	2 Primary Alcohol	2
Dig	Qui	2723626	439746	1 Primary Alcohol	1
Dig	QuiNAc	2723626	11954187	1 Amide	1
Dig	Rha	2723626	25310	1 Primary Alcohol	1
Dig	RhaNAc	2723626	91807222	1 Amide	1
Dig	Rib	2723626	10975657	1 Primary Alcohol	1
Dig	Sor	2723626	439192	2 Primary Alcohol	2
Dig	Tag	2723626	439312	2 Primary Alcohol	2
Dig	Tal	2723626	441035	2 Primary Alcohol	2
Dig	TalA	2723626	11298488	1 Primary Alcohol,1 Carboxylic Acid	2
Dig	TalN	2723626	9834117	1 Primary Alcohol,1 Primary Amine	2
Dig	TalNAc	2723626	57376616	1 Primary Alcohol,1 Amide	2
Dig	Tyv	2723626	12303782		0
Dig	Xyl	2723626	135191	1 Primary Alcohol	1
Fru	Fuc	2723872	17106	1 Primary Alcohol	1
Fru	FucNAc	2723872	91810489	2 Primary Alcohol,1 Amide	3
Fru	Gal	2723872	6036		0
Fru	GalA	2723872	439215	1 Primary Alcohol,1 Carboxylic Acid	2
Fru	GalN	2723872	24154	1 Primary Alcohol,1 Primary Amine	2
Fru	GalNAc	2723872	35717	1 Primary Alcohol,1 Amide	2
Fru	Glc	2723872	5793		0
Fru	GlcA	2723872	94715	1 Primary Alcohol,1 Carboxylic Acid	2
Fru	GlcN	2723872	439213	1 Primary Alcohol,1 Primary Amine	2
Fru	GlcNAc	2723872	439174	1 Primary Alcohol,1 Amide	2
Fru	Gul	2723872	441033		0
Fru	GulA	2723872	11788788	1 Primary Alcohol,1 Carboxylic Acid	2
Fru	GulN	2723872	9920528	1 Primary Alcohol,1 Primary Amine	2
Fru	GulNAc	2723872	13201633	1 Primary Alcohol,1 Amide	2
Fru	Ido	2723872	11030410		0
Fru	IdoA	2723872	441039	1 Primary Alcohol,1 Carboxylic Acid	2
Fru	IdoN	2723872	91864695	1 Primary Alcohol,1 Primary Amine	2
Fru	IdoNAc	2723872	13201636	1 Primary Alcohol,1 Amide	2
Fru	Kdn	2723872	13991616	1 Primary Alcohol,1 Carboxylic Acid	2
Fru	Kdo	2723872	10857507	1 Carboxylic Acid	1
Fru	Leg	2723872	70678967	2 Primary Alcohol,1 Carboxylic Acid,2 Primary Amine	5
Fru	LDmanHep	2723872	21120522	1 Primary Alcohol	1
Fru	Lyx	2723872	439240	1 Primary Alcohol	1
Fru	Man	2723872	18950		0
Fru	ManA	2723872	439630	1 Primary Alcohol,1 Carboxylic Acid	2
Fru	ManN	2723872	440049	1 Primary Alcohol,1 Primary Amine	2
Fru	ManNAc	2723872	439281	1 Primary Alcohol,1 Amide	2
Fru	Mur	2723872	441038	2 Primary Alcohol,1 Carboxylic Acid,1 Primary Amine,1 Ether	5
Fru	MurNAc	2723872	5462244	2 Primary Alcohol,1 Carboxylic Acid,1 Amide,1 Ether	5
Fru	MurNGc	2723872	91810748	1 Primary Alcohol,1 Carboxylic Acid,1 Amide,1 Ether	4
Fru	Neu	2723872	441037	1 Carboxylic Acid,1 Primary Amine	2
Fru	Neu5Ac	2723872	439197	1 Carboxylic Acid,1 Amide	2
Fru	Neu5Gc	2723872	440001	1 Primary Alcohol,1 Carboxylic Acid,1 Amide	3
Fru	Oli	2723872	10888063	2 Primary Alcohol	2
Fru	Par	2723872	12303783	2 Primary Alcohol	2
Fru	Pse	2723872	101137651	2 Primary Alcohol,1 Carboxylic Acid,2 Primary Amine	5
Fru	Psi	2723872	441036		0
Fru	Qui	2723872	439746	1 Primary Alcohol	1
Fru	QuiNAc	2723872	11954187	2 Primary Alcohol,1 Amide	3
Fru	Rha	2723872	25310	1 Primary Alcohol	1
Fru	RhaNAc	2723872	91807222	2 Primary Alcohol,1 Amide	3
Fru	Rib	2723872	10975657	1 Primary Alcohol	1
Fru	Sor	2723872	439192		0
Fru	Tag	2723872	439312		0
Fru	Tal	2723872	441035		0
Fru	TalA	2723872	11298488	1 Primary Alcohol,1 Carboxylic Acid	2
Fru	TalN	2723872	9834117	1 Primary Alcohol,1 Primary Amine	2
Fru	TalNAc	2723872	57376616	1 Primary Alcohol,1 Amide	2
Fru	Tyv	2723872	12303782	2 Primary Alcohol	2
Fru	Xyl	2723872	135191	1 Primary Alcohol	1
Fuc	FucNAc	17106	91810489	1 Primary Alcohol,1 Amide	2
Fuc	Gal	17106	6036	1 Primary Alcohol	1
Fuc	GalA	17106	439215	1 Carboxylic Acid	1
Fuc	GalN	17106	24154	1 Primary Amine	1
Fuc	GalNAc	17106	35717	1 Amide	1
Fuc	Glc	17106	5793	1 Primary Alcohol	1
Fuc	GlcA	17106	94715	1 Carboxylic Acid	1
Fuc	GlcN	17106	439213	1 Primary Amine	1
Fuc	GlcNAc	17106	439174	1 Amide	1
Fuc	Gul	17106	441033	1 Primary Alcohol	1
Fuc	GulA	17106	11788788	1 Carboxylic Acid	1
Fuc	GulN	17106	9920528	1 Primary Amine	1
Fuc	GulNAc	17106	13201633	1 Amide	1
Fuc	Ido	17106	11030410	1 Primary Alcohol	1
Fuc	IdoA	17106	441039	1 Carboxylic Acid	1
Fuc	IdoN	17106	91864695	1 Primary Amine	1
Fuc	IdoNAc	17106	13201636	1 Amide	1
Fuc	Kdn	17106	13991616	2 Primary Alcohol,1 Carboxylic Acid	3
Fuc	Kdo	17106	10857507	1 Primary Alcohol,1 Carboxylic Acid	2
Fuc	Leg	17106	70678967	1 Primary Alcohol,1 Carboxylic Acid,2 Primary Amine	4
Fuc	LDmanHep	17106	21120522	2 Primary Alcohol	2
Fuc	Lyx	17106	439240		0
Fuc	Man	17106	18950	1 Primary Alcohol	1
Fuc	ManA	17106	439630	1 Carboxylic Acid	1
Fuc	ManN	17106	440049	1 Primary Amine	1
Fuc	ManNAc	17106	439281	1 Amide	1
Fuc	Mur	17106	441038	1 Primary Alcohol,1 Carboxylic Acid,1 Primary Amine,1 Ether	4
Fuc	MurNAc	17106	5462244	1 Primary Alcohol,1 Carboxylic Acid,1 Amide,1 Ether	4
Fuc	MurNGc	17106	91810748	1 Carboxylic Acid,1 Amide,1 Ether	3
Fuc	Neu	17106	441037	1 Primary Alcohol,1 Carboxylic Acid,1 Primary Amine	3
Fuc	Neu5Ac	17106	439197	1 Primary Alcohol,1 Carboxylic Acid,1 Amide	3
Fuc	Neu5Gc	17106	440001	2 Primary Alcohol,1 Carboxylic Acid,1 Amide	4
Fuc	Oli	17106	10888063	1 Primary Alcohol	1
Fuc	Par	17106	12303783	1 Primary Alcohol	1
Fuc	Pse	17106	101137651	1 Primary Alcohol,1 Carboxylic Acid,2 Primary Amine	4
Fuc	Psi	17106	441036	1 Primary Alcohol	1
Fuc	Qui	17106	439746		0
Fuc	QuiNAc	17106	11954187	1 Primary Alcohol,1 Amide	2
Fuc	Rha	17106	25310		0
Fuc	RhaNAc	17106	91807222	1 Primary Alcohol,1 Amide	2
Fuc	Rib	17106	10975657		0
Fuc	Sor	17106	439192	1 Primary Alcohol	1
Fuc	Tag	17106	439312	1 Primary Alcohol	1
Fuc	Tal	17106	441035	1 Primary Alcohol	1
Fuc	TalA	17106	11298488	1 Carboxylic Acid	1
Fuc	TalN	17106	9834117	1 Primary Amine	1
Fuc	TalNAc	17106	57376616	1 Amide	1
Fuc	Tyv	17106	12303782	1 Primary Alcohol	1
Fuc	Xyl	17106	135191		0
FucNAc	Gal	91810489	6036	2 Primary Alcohol,1 Amide	3
FucNAc	GalA	91810489	439215	1 Primary Alcohol,1 Carboxylic Acid,1 Amide	3
FucNAc	GalN	91810489	24154	1 Primary Alcohol,1 Primary Amine,1 Amide	3
FucNAc	GalNAc	91810489	35717	1 Primary Alcohol	1
FucNAc	Glc	91810489	5793	2 Primary Alcohol,1 Amide	3
FucNAc	GlcA	91810489	94715	1 Primary Alcohol,1 Carboxylic Acid,1 Amide	3
FucNAc	GlcN	91810489	439213	1 Primary Alcohol,1 Primary Amine,1 Amide	3
FucNAc	GlcNAc	91810489	439174	1 Primary Alcohol	1
FucNAc	Gul	91810489	441033	2 Primary Alcohol,1 Amide	3
FucNAc	GulA	91810489	11788788	1 Primary Alcohol,1 Carboxylic Acid,1 Amide	3
FucNAc	GulN	91810489	9920528	1 Primary Alcohol,1 Primary Amine,1 Amide	3
FucNAc	GulNAc	91810489	13201633	1 Primary Alcohol	1
FucNAc	Ido	91810489	11030410	2 Primary Alcohol,1 Amide	3
FucNAc	IdoA	91810489	441039	1 Primary Alcohol,1 Carboxylic Acid,1 Amide	3
FucNAc	IdoN	91810489	91864695	1 Primary Alcohol,1 Primary Amine,1 Amide	3
FucNAc	IdoNAc	91810489	13201636	1 Primary Alcohol	1
FucNAc	Kdn	91810489	13991616	3 Primary Alcohol,1 Carboxylic Acid,1 Amide	5
FucNAc	Kdo	91810489	10857507	2 Primary Alcohol,1 Carboxylic Acid,1 Amide	4
FucNAc	Leg	91810489	70678967	1 Carboxylic Acid,2 Primary Amine,1 Amide	4
FucNAc	LDmanHep	91810489	21120522	3 Primary Alcohol,1 Amide	4
FucNAc	Lyx	91810489	439240	1 Primary Alcohol,1 Amide	2
FucNAc	Man	91810489	18950	2 Primary Alcohol,1 Amide	3
FucNAc	ManA	91810489	439630	1 Primary Alcohol,1 Carboxylic Acid,1 Amide	3
FucNAc	ManN	91810489	440049	1 Primary Alcohol,1 Primary Amine,1 Amide	3
FucNAc	ManNAc	91810489	439281	1 Primary Alcohol	1
FucNAc	Mur	91810489	441038	1 Carboxylic Acid,1 Primary Amine,1 Amide,1 Ether	4
FucNAc	MurNAc	91810489	5462244	1 Carboxylic Acid,1 Ether	2
FucNAc	MurNGc	91810489	91810748	1 Primary Alcohol,1 Carboxylic Acid,1 Ether	3
FucNAc	Neu	91810489	441037	2 Primary Alcohol,1 Carboxylic Acid,1 Primary Amine,1 Amide	5
FucNAc	Neu5Ac	91810489	439197	2 Primary Alcohol,1 Carboxylic Acid	3
FucNAc	Neu5Gc	91810489	440001	3 Primary Alcohol,1 Carboxylic Acid	4
FucNAc	Oli	91810489	10888063	1 Amide	1
FucNAc	Par	91810489	12303783	1 Amide	1
FucNAc	Pse	91810489	101137651	1 Carboxylic Acid,2 Primary Amine,1 Amide	4
FucNAc	Psi	91810489	441036	2 Primary Alcohol,1 Amide	3
FucNAc	Qui	91810489	439746	1 Primary Alcohol,1 Amide	2
FucNAc	QuiNAc	91810489	11954187		0
FucNAc	Rha	91810489	25310	1 Primary Alcohol,1 Amide	2
FucNAc	RhaNAc	91810489	91807222		0
FucNAc	Rib	91810489	10975657	1 Primary Alcohol,1 Amide	2
FucNAc	Sor	91810489	439192	2 Primary Alcohol,1 Amide	3
FucNAc	Tag	91810489	439312	2 Primary Alcohol,1 Amide	3
FucNAc	Tal	91810489	441035	2 Primary Alcohol,1 Amide	3
FucNAc	TalA	91810489	11298488	1 Primary Alcohol,1 Carboxylic Acid,1 Amide	3
FucNAc	TalN	91810489	9834117	1 Primary Alcohol,1 Primary Amine,1 Amide	3
FucNAc	TalNAc	91810489	57376616	1 Primary Alcohol	1
FucNAc	Tyv	91810489	12303782	1 Amide	1
FucNAc	Xyl	91810489	135191	1 Primary Alcohol,1 Amide	2
Gal	GalA	6036	439215	1 Primary Alcohol,1 Carboxylic Acid	2
Gal	GalN	6036	24154	1 Primary Alcohol,1 Primary Amine	2
Gal	GalNAc	6036	35717	1 Primary Alcohol,1 Amide	2
Gal	Glc	6036	5793		0
Gal	GlcA	6036	94715	1 Primary Alcohol,1 Carboxylic Acid	2
Gal	GlcN	6036	439213	1 Primary Alcohol,1 Primary Amine	2
Gal	GlcNAc	6036	439174	1 Primary Alcohol,1 Amide	2
Gal	Gul	6036	441033		0
Gal	GulA	6036	11788788	1 Primary Alcohol,1 Carboxylic Acid	2
Gal	GulN	6036	9920528	1 Primary Alcohol,1 Primary Amine	2
Gal	GulNAc	6036	13201633	1 Primary Alcohol,1 Amide	2
Gal	Ido	6036	11030410		0
Gal	IdoA	6036	441039	1 Primary Alcohol,1 Carboxylic Acid	2
Gal	IdoN	6036	91864695	1 Primary Alcohol,1 Primary Amine	2
Gal	IdoNAc	6036	13201636	1 Primary Alcohol,1 Amide	2
Gal	Kdn	6036	13991616	1 Primary Alcohol,1 Carboxylic Acid	2
Gal	Kdo	6036	10857507	1 Carboxylic Acid	1
Gal	Leg	6036	70678967	2 Primary Alcohol,1 Carboxylic Acid,2 Primary Amine	5
Gal	LDmanHep	6036	21120522	1 Primary Alcohol	1
Gal	Lyx	6036	439240	1 Primary Alcohol	1
Gal	Man	6036	18950		0
Gal	ManA	6036	439630	1 Primary Alcohol,1 Carboxylic Acid	2
Gal	ManN	6036	440049	1 Primary Alcohol,1 Primary Amine	2
Gal	ManNAc	6036	439281	1 Primary Alcohol,1 Amide	2
Gal	Mur	6036	441038	2 Primary Alcohol,1 Carboxylic Acid,1 Primary Amine,1 Ether	5
Gal	MurNAc	6036	5462244	2 Primary Alcohol,1 Carboxylic Acid,1 Amide,1 Ether	5
Gal	MurNGc	6036	91810748	1 Primary Alcohol,1 Carboxylic Acid,1 Amide,1 Ether	4
Gal	Neu	6036	441037	1 Carboxylic Acid,1 Primary Amine	2
Gal	Neu5Ac	6036	439197	1 Carboxylic Acid,1 Amide	2
Gal	Neu5Gc	6036	440001	1 Primary Alcohol,1 Carboxylic Acid,1 Amide	3
Gal	Oli	6036	10888063	2 Primary Alcohol	2
Gal	Par	6036	12303783	2 Primary Alcohol	2
Gal	Pse	6036	101137651	2 Primary Alcohol,1 Carboxylic Acid,2 Primary Amine	5
Gal	Psi	6036	441036		0
Gal	Qui	6036	439746	1 Primary Alcohol	1
Gal	QuiNAc	6036	11954187	2 Primary Alcohol,1 Amide	3
Gal	Rha	6036	25310	1 Primary Alcohol	1
Gal	RhaNAc	6036	91807222	2 Primary Alcohol,1 Amide	3
Gal	Rib	6036	10975657	1 Primary Alcohol	1
Gal	Sor	6036	439192		0
Gal	Tag	6036	439312		0
Gal	Tal	6036	441035		0
Gal	TalA	6036	11298488	1 Primary Alcohol,1 Carboxylic Acid	2
Gal	TalN	6036	9834117	1 Primary Alcohol,1 Primary Amine	2
Gal	TalNAc	6036	57376616	1 Primary Alcohol,1 Amide	2
Gal	Tyv	6036	12303782	2 Primary Alcohol	2
Gal	Xyl	6036	135191	1 Primary Alcohol	1
GalA	GalN	439215	24154	1 Carboxylic Acid,1 Primary Amine	2
GalA	GalNAc	439215	35717	1 Carboxylic Acid,1 Amide	2
GalA	Glc	439215	5793	1 Primary Alcohol,1 Carboxylic Acid	2
GalA	GlcA	439215	94715		0
GalA	GlcN	439215	439213	1 Carboxylic Acid,1 Primary Amine	2
GalA	GlcNAc	439215	439174	1 Carboxylic Acid,1 Amide	2
GalA	Gul	439215	441033	1 Primary Alcohol,1 Carboxylic Acid	2
GalA	GulA	439215	11788788		0
GalA	GulN	439215	9920528	1 Carboxylic Acid,1 Primary Amine	2
GalA	GulNAc	439215	13201633	1 Carboxylic Acid,1 Amide	2
GalA	Ido	439215	11030410	1 Primary Alcohol,1 Carboxylic Acid	2
GalA	IdoA	439215	441039		0
GalA	IdoN	439215	91864695	1 Carboxylic Acid,1 Primary Amine	2
GalA	IdoNAc	439215	13201636	1 Carboxylic Acid,1 Amide	2
GalA	Kdn	439215	13991616	2 Primary Alcohol	2
GalA	Kdo	439215	10857507	1 Primary Alcohol	1
GalA	Leg	439215	70678967	1 Primary Alcohol,2 Primary Amine	3
GalA	LDmanHep	439215	21120522	2 Primary Alcohol,1 Carboxylic Acid	3
GalA	Lyx	439215	439240	1 Carboxylic Acid	1
GalA	Man	439215	18950	1 Primary Alcohol,1 Carboxylic Acid	2
GalA	ManA	439215	439630		0
GalA	ManN	439215	440049	1 Carboxylic Acid,1 Primary Amine	2
GalA	ManNAc	439215	439281	1 Carboxylic Acid,1 Amide	2
GalA	Mur	439215	441038	1 Primary Alcohol,1 Primary Amine,1 Ether	3
GalA	MurNAc	439215	5462244	1 Primary Alcohol,1 Amide,1 Ether	3
GalA	MurNGc	439215	91810748	1 Amide,1 Ether	2
GalA	Neu	439215	441037	1 Primary Alcohol,1 Primary Amine	2
GalA	Neu5Ac	439215	439197	1 Primary Alcohol,1 Amide	2
GalA	Neu5Gc	439215	440001	2 Primary Alcohol,1 Amide	3
GalA	Oli	439215	10888063	1 Primary Alcohol,1 Carboxylic Acid	2
GalA	Par	439215	12303783	1 Primary Alcohol,1 Carboxylic Acid	2
GalA	Pse	439215	101137651	1 Primary Alcohol,2 Primary Amine	3
GalA	Psi	439215	441036	1 Primary Alcohol,1 Carboxylic Acid	2
GalA	Qui	439215	439746	1 Carboxylic Acid	1
GalA	QuiNAc	439215	11954187	1 Primary Alcohol,1 Carboxylic Acid,1 Amide	3
GalA	Rha	439215	25310	1 Carboxylic Acid	1
GalA	RhaNAc	439215	91807222	1 Primary Alcohol,1 Carboxylic Acid,1 Amide	3
GalA	Rib	439215	10975657	1 Carboxylic Acid	1
GalA	Sor	439215	439192	1 Primary Alcohol,1 Carboxylic Acid	2
GalA	Tag	439215	439312	1 Primary Alcohol,1 Carboxylic Acid	2
GalA	Tal	439215	441035	1 Primary Alcohol,1 Carboxylic Acid	2
GalA	TalA	439215	11298488		0
GalA	TalN	439215	9834117	1 Carboxylic Acid,1 Primary Amine	2
GalA	TalNAc	439215	57376616	1 Carboxylic Acid,1 Amide	2
GalA	Tyv	439215	12303782	1 Primary Alcohol,1 Carboxylic Acid	2
GalA	Xyl	439215	135191	1 Carboxylic Acid	1
GalN	GalNAc	24154	35717	1 Primary Amine,1 Amide	2
GalN	Glc	24154	5793	1 Primary Alcohol,1 Primary Amine	2
GalN	GlcA	24154	94715	1 Carboxylic Acid,1 Primary Amine	2
GalN	GlcN	24154	439213		0
GalN	GlcNAc	24154	439174	1 Primary Amine,1 Amide	2
GalN	Gul	24154	441033	1 Primary Alcohol,1 Primary Amine	2
GalN	GulA	24154	11788788	1 Carboxylic Acid,1 Primary Amine	2
GalN	GulN	24154	9920528		0
GalN	GulNAc	24154	13201633	1 Primary Amine,1 Amide	2
GalN	Ido	24154	11030410	1 Primary Alcohol,1 Primary Amine	2
GalN	IdoA	24154	441039	1 Carboxylic Acid,1 Primary Amine	2
GalN	IdoN	24154	91864695		0
GalN	IdoNAc	24154	13201636	1 Primary Amine,1 Amide	2
GalN	Kdn	24154	13991616	2 Primary Alcohol,1 Carboxylic Acid,1 Primary Amine	4
GalN	Kdo	24154	10857507	1 Primary Alcohol,1 Carboxylic Acid,1 Primary Amine	3
GalN	Leg	24154	70678967	1 Primary Alcohol,1 Carboxylic Acid,1 Primary Amine	3
GalN	LDmanHep	24154	21120522	2 Primary Alcohol,1 Primary Amine	3
GalN	Lyx	24154	439240	1 Primary Amine	1
GalN	Man	24154	18950	1 Primary Alcohol,1 Primary Amine	2
GalN	ManA	24154	439630	1 Carboxylic Acid,1 Primary Amine	2
GalN	ManN	24154	440049		0
GalN	ManNAc	24154	439281	1 Primary Amine,1 Amide	2
GalN	Mur	24154	441038	1 Primary Alcohol,1 Carboxylic Acid,1 Ether	3
GalN	MurNAc	24154	5462244	1 Primary Alcohol,1 Carboxylic Acid,1 Primary Amine,1 Amide,1 Ether	5
GalN	MurNGc	24154	91810748	1 Carboxylic Acid,1 Primary Amine,1 Amide,1 Ether	4
GalN	Neu	24154	441037	1 Primary Alcohol,1 Carboxylic Acid	2
GalN	Neu5Ac	24154	439197	1 Primary Alcohol,1 Carboxylic Acid,1 Primary Amine,1 Amide	4
GalN	Neu5Gc	24154	440001	2 Primary Alcohol,1 Carboxylic Acid,1 Primary Amine,1 Amide	5
GalN	Oli	24154	10888063	1 Primary Alcohol,1 Primary Amine	2
GalN	Par	24154	12303783	1 Primary Alcohol,1 Primary Amine	2
GalN	Pse	24154	101137651	1 Primary Alcohol,1 Carboxylic Acid,1 Primary Amine	3
GalN	Psi	24154	441036	1 Primary Alcohol,1 Primary Amine	2
GalN	Qui	24154	439746	1 Primary Amine	1
GalN	QuiNAc	24154	11954187	1 Primary Alcohol,1 Primary Amine,1 Amide	3
GalN	Rha	24154	25310	1 Primary Amine	1
GalN	RhaNAc	24154	91807222	1 Primary Alcohol,1 Primary Amine,1 Amide	3
GalN	Rib	24154	10975657	1 Primary Amine	1
GalN	Sor	24154	439192	1 Primary Alcohol,1 Primary Amine	2
GalN	Tag	24154	439312	1 Primary Alcohol,1 Primary Amine	2
GalN	Tal	24154	441035	1 Primary Alcohol,1 Primary Amine	2
GalN	TalA	24154	11298488	1 Carboxylic Acid,1 Primary Amine	2
GalN	TalN	24154	9834117		0
GalN	TalNAc	24154	57376616	1 Primary Amine,1 Amide	2
GalN	Tyv	24154	12303782	1 Primary Alcohol,1 Primary Amine	2
GalN	Xyl	24154	135191	1 Primary Amine	1
GalNAc	Glc	35717	5793	1 Primary Alcohol,1 Amide	2
GalNAc	GlcA	35717	94715	1 Carboxylic Acid,1 Amide	2
GalNAc	GlcN	35717	439213	1 Primary Amine,1 Amide	2
GalNAc	GlcNAc	35717	439174		0
GalNAc	Gul	35717	441033	1 Primary Alcohol,1 Amide	2
GalNAc	GulA	35717	11788788	1 Carboxylic Acid,1 Amide	2
GalNAc	GulN	35717	9920528	1 Primary Amine,1 Amide	2
GalNAc	GulNAc	35717	13201633		0
GalNAc	Ido	35717	11030410	1 Primary Alcohol,1 Amide	2
GalNAc	IdoA	35717	441039	1 Carboxylic Acid,1 Amide	2
GalNAc	IdoN	35717	91864695	1 Primary Amine,1 Amide	2
GalNAc	IdoNAc	35717	13201636		0
GalNAc	Kdn	35717	13991616	2 Primary Alcohol,1 Carboxylic Acid,1 Amide	4
GalNAc	Kdo	35717	10857507	1 Primary Alcohol,1 Carboxylic Acid,1 Amide	3
GalNAc	Leg	35717	70678967	1 Primary Alcohol,1 Carboxylic Acid,1 Primary Amine,1 Amide	4
GalNAc	LDmanHep	35717	21120522	2 Primary Alcohol,1 Amide	3
GalNAc	Lyx	35717	439240	1 Amide	1
GalNAc	Man	35717	18950	1 Primary Alcohol,1 Amide	2
GalNAc	ManA	35717	439630	1 Carboxylic Acid,1 Amide	2
GalNAc	ManN	35717	440049	1 Primary Amine,1 Amide	2
GalNAc	ManNAc	35717	439281		0
GalNAc	Mur	35717	441038	1 Primary Alcohol,1 Carboxylic Acid,1 Primary Amine,1 Amide,1 Ether	5
GalNAc	MurNAc	35717	5462244	1 Primary Alcohol,1 Carboxylic Acid,1 Ether	3
GalNAc	MurNGc	35717	91810748	1 Carboxylic Acid,1 Amide,1 Ether	3
GalNAc	Neu	35717	441037	1 Primary Alcohol,1 Carboxylic Acid,1 Primary Amine,1 Amide	4
GalNAc	Neu5Ac	35717	439197	1 Primary Alcohol,1 Carboxylic Acid	2
GalNAc	Neu5Gc	35717	440001	2 Primary Alcohol,1 Carboxylic Acid	3
GalNAc	Oli	35717	10888063	1 Primary Alcohol,1 Amide	2
GalNAc	Par	35717	12303783	1 Primary Alcohol,1 Amide	2
GalNAc	Pse	35717	101137651	1 Primary Alcohol,1 Carboxylic Acid,1 Primary Amine,1 Amide	4
GalNAc	Psi	35717	441036	1 Primary Alcohol,1 Amide	2
GalNAc	Qui	35717	439746	1 Amide	1
GalNAc	QuiNAc	35717	11954187	1 Primary Alcohol	1
GalNAc	Rha	35717	25310	1 Amide	1
GalNAc	RhaNAc	35717	91807222	1 Primary Alcohol	1
GalNAc	Rib	35717	10975657	1 Amide	1
GalNAc	Sor	35717	439192	1 Primary Alcohol,1 Amide	2
GalNAc	Tag	35717	439312	1 Primary Alcohol,1 Amide	2
GalNAc	Tal	35717	441035	1 Primary Alcohol,1 Amide	2
GalNAc	TalA	35717	11298488	1 Carboxylic Acid,1 Amide	2
GalNAc	TalN	35717	9834117	1 Primary Amine,1 Amide	2
GalNAc	TalNAc	35717	57376616		0
GalNAc	Tyv	35717	12303782	1 Primary Alcohol,1 Amide	2
GalNAc	Xyl	35717	135191	1 Amide	1
Glc	GlcA	5793	94715	1 Primary Alcohol,1 Carboxylic Acid	2
Glc	GlcN	5793	439213	1 Primary Alcohol,1 Primary Amine	2
Glc	GlcNAc	5793	439174	1 Primary Alcohol,1 Amide	2
Glc	Gul	5793	441033		0
Glc	GulA	5793	11788788	1 Primary Alcohol,1 Carboxylic Acid	2
Glc	GulN	5793	9920528	1 Primary Alcohol,1 Primary Amine	2
Glc	GulNAc	5793	13201633	1 Primary Alcohol,1 Amide	2
Glc	Ido	5793	11030410		0
Glc	IdoA	5793	441039	1 Primary Alcohol,1 Carboxylic Acid	2
Glc	IdoN	5793	91864695	1 Primary Alcohol,1 Primary Amine	2
Glc	IdoNAc	5793	13201636	1 Primary Alcohol,1 Amide	2
Glc	Kdn	5793	13991616	1 Primary Alcohol,1 Carboxylic Acid	2
Glc	Kdo	5793	10857507	1 Carboxylic Acid	1
Glc	Leg	5793	70678967	2 Primary Alcohol,1 Carboxylic Acid,2 Primary Amine	5
Glc	LDmanHep	5793	21120522	1 Primary Alcohol	1
Glc	Lyx	5793	439240	1 Primary Alcohol	1
Glc	Man	5793	18950		0
Glc	ManA	5793	439630	1 Primary Alcohol,1 Carboxylic Acid	2
Glc	ManN	5793	440049	1 Primary Alcohol,1 Primary Amine	2
Glc	ManNAc	5793	439281	1 Primary Alcohol,1 Amide	2
Glc	Mur	5793	441038	2 Primary Alcohol,1 Carboxylic Acid,1 Primary Amine,1 Ether	5
Glc	MurNAc	5793	5462244	2 Primary Alcohol,1 Carboxylic Acid,1 Amide,1 Ether	5
Glc	MurNGc	5793	91810748	1 Primary Alcohol,1 Carboxylic Acid,1 Amide,1 Ether	4
Glc	Neu	5793	441037	1 Carboxylic Acid,1 Primary Amine	2
Glc	Neu5Ac	5793	439197	1 Carboxylic Acid,1 Amide	2
Glc	Neu5Gc	5793	440001	1 Primary Alcohol,1 Carboxylic Acid,1 Amide	3
Glc	Oli	5793	10888063	2 Primary Alcohol	2
Glc	Par	5793	12303783	2 Primary Alcohol	2
Glc	Pse	5793	101137651	2 Primary Alcohol,1 Carboxylic Acid,2 Primary Amine	5
Glc	Psi	5793	441036		0
Glc	Qui	5793	439746	1 Primary Alcohol	1
Glc	QuiNAc	5793	11954187	2 Primary Alcohol,1 Amide	3
Glc	Rha	5793	25310	1 Primary Alcohol	1
Glc	RhaNAc	5793	91807222	2 Primary Alcohol,1 Amide	3
Glc	Rib	5793	10975657	1 Primary Alcohol	1
Glc	Sor	5793	439192		0
Glc	Tag	5793	439312		0
Glc	Tal	5793	441035		0
Glc	TalA	5793	11298488	1 Primary Alcohol,1 Carboxylic Acid	2
Glc	TalN	5793	9834117	1 Primary Alcohol,1 Primary Amine	2
Glc	TalNAc	5793	57376616	1 Primary Alcohol,1 Amide	2
Glc	Tyv	5793	12303782	2 Primary Alcohol	2
Glc	Xyl	5793	135191	1 Primary Alcohol	1
GlcA	GlcN	94715	439213	1 Carboxylic Acid,1 Primary Amine	2
GlcA	GlcNAc	94715	439174	1 Carboxylic Acid,1 Amide	2
GlcA	Gul	94715	441033	1 Primary Alcohol,1 Carboxylic Acid	2
GlcA	GulA	94715	11788788		0
GlcA	GulN	94715	9920528	1 Carboxylic Acid,1 Primary Amine	2
GlcA	GulNAc	94715	13201633	1 Carboxylic Acid,1 Amide	2
GlcA	Ido	94715	11030410	1 Primary Alcohol,1 Carboxylic Acid	2
GlcA	IdoA	94715	441039		0
GlcA	IdoN	94715	91864695	1 Carboxylic Acid,1 Primary Amine	2
GlcA	IdoNAc	94715	13201636	1 Carboxylic Acid,1 Amide	2
GlcA	Kdn	94715	13991616	2 Primary Alcohol	2
GlcA	Kdo	94715	10857507	1 Primary Alcohol	1
GlcA	Leg	94715	70678967	1 Primary Alcohol,2 Primary Amine	3
GlcA	LDmanHep	94715	21120522	2 Primary Alcohol,1 Carboxylic Acid	3
GlcA	Lyx	94715	439240	1 Carboxylic Acid	1
GlcA	Man	94715	18950	1 Primary Alcohol,1 Carboxylic Acid	2
GlcA	ManA	94715	439630		0
GlcA	ManN	94715	440049	1 Carboxylic Acid,1 Primary Amine	2
GlcA	ManNAc	94715	439281	1 Carboxylic Acid,1 Amide	2
GlcA	Mur	94715	441038	1 Primary Alcohol,1 Primary Amine,1 Ether	3
GlcA	MurNAc	94715	5462244	1 Primary Alcohol,1 Amide,1 Ether	3
GlcA	MurNGc	94715	91810748	1 Amide,1 Ether	2
GlcA	Neu	94715	441037	1 Primary Alcohol,1 Primary Amine	2
GlcA	Neu5Ac	94715	439197	1 Primary Alcohol,1 Amide	2
GlcA	Neu5Gc	94715	440001	2 Primary Alcohol,1 Amide	3
GlcA	Oli	94715	10888063	1 Primary Alcohol,1 Carboxylic Acid	2
GlcA	Par	94715	12303783	1 Primary Alcohol,1 Carboxylic Acid	2
GlcA	Pse	94715	101137651	1 Primary Alcohol,2 Primary Amine	3
GlcA	Psi	94715	441036	1 Primary Alcohol,1 Carboxylic Acid	2
GlcA	Qui	94715	439746	1 Carboxylic Acid	1
GlcA	QuiNAc	94715	11954187	1 Primary Alcohol,1 Carboxylic Acid,1 Amide	3
GlcA	Rha	94715	25310	1 Carboxylic Acid	1
GlcA	RhaNAc	94715	91807222	1 Primary Alcohol,1 Carboxylic Acid,1 Amide	3
GlcA	Rib	94715	10975657	1 Carboxylic Acid	1
GlcA	Sor	94715	439192	1 Primary Alcohol,1 Carboxylic Acid	2
GlcA	Tag	94715	439312	1 Primary Alcohol,1 Carboxylic Acid	2
GlcA	Tal	94715	441035	1 Primary Alcohol,1 Carboxylic Acid	2
GlcA	TalA	94715	11298488		0
GlcA	TalN	94715	9834117	1 Carboxylic Acid,1 Primary Amine	2
GlcA	TalNAc	94715	57376616	1 Carboxylic Acid,1 Amide	2
GlcA	Tyv	94715	12303782	1 Primary Alcohol,1 Carboxylic Acid	2
GlcA	Xyl	94715	135191	1 Carboxylic Acid	1
GlcN	GlcNAc	439213	439174	1 Primary Amine,1 Amide	2
GlcN	Gul	439213	441033	1 Primary Alcohol,1 Primary Amine	2
GlcN	GulA	439213	11788788	1 Carboxylic Acid,1 Primary Amine	2
GlcN	GulN	439213	9920528		0
GlcN	GulNAc	439213	13201633	1 Primary Amine,1 Amide	2
GlcN	Ido	439213	11030410	1 Primary Alcohol,1 Primary Amine	2
GlcN	IdoA	439213	441039	1 Carboxylic Acid,1 Primary Amine	2
GlcN	IdoN	439213	91864695		0
GlcN	IdoNAc	439213	13201636	1 Primary Amine,1 Amide	2
GlcN	Kdn	439213	13991616	2 Primary Alcohol,1 Carboxylic Acid,1 Primary Amine	4
GlcN	Kdo	439213	10857507	1 Primary Alcohol,1 Carboxylic Acid,1 Primary Amine	3
GlcN	Leg	439213	70678967	1 Primary Alcohol,1 Carboxylic Acid,1 Primary Amine	3
GlcN	LDmanHep	439213	21120522	2 Primary Alcohol,1 Primary Amine	3
GlcN	Lyx	439213	439240	1 Primary Amine	1
GlcN	Man	439213	18950	1 Primary Alcohol,1 Primary Amine	2
GlcN	ManA	439213	439630	1 Carboxylic Acid,1 Primary Amine	2
GlcN	ManN	439213	440049		0
GlcN	ManNAc	439213	439281	1 Primary Amine,1 Amide	2
GlcN	Mur	439213	441038	1 Primary Alcohol,1 Carboxylic Acid,1 Ether	3
GlcN	MurNAc	439213	5462244	1 Primary Alcohol,1 Carboxylic Acid,1 Primary Amine,1 Amide,1 Ether	5
GlcN	MurNGc	439213	91810748	1 Carboxylic Acid,1 Primary Amine,1 Amide,1 Ether	4
GlcN	Neu	439213	441037	1 Primary Alcohol,1 Carboxylic Acid	2
GlcN	Neu5Ac	439213	439197	1 Primary Alcohol,1 Carboxylic Acid,1 Primary Amine,1 Amide	4
GlcN	Neu5Gc	439213	440001	2 Primary Alcohol,1 Carboxylic Acid,1 Primary Amine,1 Amide	5
GlcN	Oli	439213	10888063	1 Primary Alcohol,1 Primary Amine	2
GlcN	Par	439213	12303783	1 Primary Alcohol,1 Primary Amine	2
GlcN	Pse	439213	101137651	1 Primary Alcohol,1 Carboxylic Acid,1 Primary Amine	3
GlcN	Psi	439213	441036	1 Primary Alcohol,1 Primary Amine	2
GlcN	Qui	439213	439746	1 Primary Amine	1
GlcN	QuiNAc	439213	11954187	1 Primary Alcohol,1 Primary Amine,1 Amide	3
GlcN	Rha	439213	25310	1 Primary Amine	1
GlcN	RhaNAc	439213	91807222	1 Primary Alcohol,1 Primary Amine,1 Amide	3
GlcN	Rib	439213	10975657	1 Primary Amine	1
GlcN	Sor	439213	439192	1 Primary Alcohol,1 Primary Amine	2
GlcN	Tag	439213	439312	1 Primary Alcohol,1 Primary Amine	2
GlcN	Tal	439213	441035	1 Primary Alcohol,1 Primary Amine	2
GlcN	TalA	439213	11298488	1 Carboxylic Acid,1 Primary Amine	2
GlcN	TalN	439213	9834117		0
GlcN	TalNAc	439213	57376616	1 Primary Amine,1 Amide	2
GlcN	Tyv	439213	12303782	1 Primary Alcohol,1 Primary Amine	2
GlcN	Xyl	439213	135191	1 Primary Amine	1
GlcNAc	Gul	439174	441033	1 Primary Alcohol,1 Amide	2
GlcNAc	GulA	439174	11788788	1 Carboxylic Acid,1 Amide	2
GlcNAc	GulN	439174	9920528	1 Primary Amine,1 Amide	2
GlcNAc	GulNAc	439174	13201633		0
GlcNAc	Ido	439174	11030410	1 Primary Alcohol,1 Amide	2
GlcNAc	IdoA	439174	441039	1 Carboxylic Acid,1 Amide	2
GlcNAc	IdoN	439174	91864695	1 Primary Amine,1 Amide	2
GlcNAc	IdoNAc	439174	13201636		0
GlcNAc	Kdn	439174	13991616	2 Primary Alcohol,1 Carboxylic Acid,1 Amide	4
GlcNAc	Kdo	439174	10857507	1 Primary Alcohol,1 Carboxylic Acid,1 Amide	3
GlcNAc	Leg	439174	70678967	1 Primary Alcohol,1 Carboxylic Acid,1 Primary Amine,1 Amide	4
GlcNAc	LDmanHep	439174	21120522	2 Primary Alcohol,1 Amide	3
GlcNAc	Lyx	439174	439240	1 Amide	1
GlcNAc	Man	439174	18950	1 Primary Alcohol,1 Amide	2
GlcNAc	ManA	439174	439630	1 Carboxylic Acid,1 Amide	2
GlcNAc	ManN	439174	440049	1 Primary Amine,1 Amide	2
GlcNAc	ManNAc	439174	439281		0
GlcNAc	Mur	439174	441038	1 Primary Alcohol,1 Carboxylic Acid,1 Primary Amine,1 Amide,1 Ether	5
GlcNAc	MurNAc	439174	5462244	1 Primary Alcohol,1 Carboxylic Acid,1 Ether	3
GlcNAc	MurNGc	439174	91810748	1 Carboxylic Acid,1 Amide,1 Ether	3
GlcNAc	Neu	439174	441037	1 Primary Alcohol,1 Carboxylic Acid,1 Primary Amine,1 Amide	4
GlcNAc	Neu5Ac	439174	439197	1 Primary Alcohol,1 Carboxylic Acid	2
GlcNAc	Neu5Gc	439174	440001	2 Primary Alcohol,1 Carboxylic Acid	3
GlcNAc	Oli	439174	10888063	1 Primary Alcohol,1 Amide	2
GlcNAc	Par	439174	12303783	1 Primary Alcohol,1 Amide	2
GlcNAc	Pse	439174	101137651	1 Primary Alcohol,1 Carboxylic Acid,1 Primary Amine,1 Amide	4
GlcNAc	Psi	439174	441036	1 Primary Alcohol,1 Amide	2
GlcNAc	Qui	439174	439746	1 Amide	1
GlcNAc	QuiNAc	439174	11954187	1 Primary Alcohol	1
GlcNAc	Rha	439174	25310	1 Amide	1
GlcNAc	RhaNAc	439174	91807222	1 Primary Alcohol	1
GlcNAc	Rib	439174	10975657	1 Amide	1
GlcNAc	Sor	439174	439192	1 Primary Alcohol,1 Amide	2
GlcNAc	Tag	439174	439312	1 Primary Alcohol,1 Amide	2
GlcNAc	Tal	439174	441035	1 Primary Alcohol,1 Amide	2
GlcNAc	TalA	439174	11298488	1 Carboxylic Acid,1 Amide	2
GlcNAc	TalN	439174	9834117	1 Primary Amine,1 Amide	2
GlcNAc	TalNAc	439174	57376616		0
GlcNAc	Tyv	439174	12303782	1 Primary Alcohol,1 Amide	2
GlcNAc	Xyl	439174	135191	1 Amide	1
Gul	GulA	441033	11788788	1 Primary Alcohol,1 Carboxylic Acid	2
Gul	GulN	441033	9920528	1 Primary Alcohol,1 Primary Amine	2
Gul	GulNAc	441033	13201633	1 Primary Alcohol,1 Amide	2
Gul	Ido	441033	11030410		0
Gul	IdoA	441033	441039	1 Primary Alcohol,1 Carboxylic Acid	2
Gul	IdoN	441033	91864695	1 Primary Alcohol,1 Primary Amine	2
Gul	IdoNAc	441033	13201636	1 Primary Alcohol,1 Amide	2
Gul	Kdn	441033	13991616	1 Primary Alcohol,1 Carboxylic Acid	2
Gul	Kdo	441033	10857507	1 Carboxylic Acid	1
Gul	Leg	441033	70678967	2 Primary Alcohol,1 Carboxylic Acid,2 Primary Amine	5
Gul	LDmanHep	441033	21120522	1 Primary Alcohol	1
Gul	Lyx	441033	439240	1 Primary Alcohol	1
Gul	Man	441033	18950		0
Gul	ManA	441033	439630	1 Primary Alcohol,1 Carboxylic Acid	2
Gul	ManN	441033	440049	1 Primary Alcohol,1 Primary Amine	2
Gul	ManNAc	441033	439281	1 Primary Alcohol,1 Amide	2
Gul	Mur	441033	441038	2 Primary Alcohol,1 Carboxylic Acid,1 Primary Amine,1 Ether	5
Gul	MurNAc	441033	5462244	2 Primary Alcohol,1 Carboxylic Acid,1 Amide,1 Ether	5
Gul	MurNGc	441033	91810748	1 Primary Alcohol,1 Carboxylic Acid,1 Amide,1 Ether	4
Gul	Neu	441033	441037	1 Carboxylic Acid,1 Primary Amine	2
Gul	Neu5Ac	441033	439197	1 Carboxylic Acid,1 Amide	2
Gul	Neu5Gc	441033	440001	1 Primary Alcohol,1 Carboxylic Acid,1 Amide	3
Gul	Oli	441033	10888063	2 Primary Alcohol	2
Gul	Par	441033	12303783	2 Primary Alcohol	2
Gul	Pse	441033	101137651	2 Primary Alcohol,1 Carboxylic Acid,2 Primary Amine	5
Gul	Psi	441033	441036		0
Gul	Qui	441033	439746	1 Primary Alcohol	1
Gul	QuiNAc	441033	11954187	2 Primary Alcohol,1 Amide	3
Gul	Rha	441033	25310	1 Primary Alcohol	1
Gul	RhaNAc	441033	91807222	2 Primary Alcohol,1 Amide	3
Gul	Rib	441033	10975657	1 Primary Alcohol	1
Gul	Sor	441033	439192		0
Gul	Tag	441033	439312		0
Gul	Tal	441033	441035		0
Gul	TalA	441033	11298488	1 Primary Alcohol,1 Carboxylic Acid	2
Gul	TalN	441033	9834117	1 Primary Alcohol,1 Primary Amine	2
Gul	TalNAc	441033	57376616	1 Primary Alcohol,1 Amide	2
Gul	Tyv	441033	12303782	2 Primary Alcohol	2
Gul	Xyl	441033	135191	1 Primary Alcohol	1
GulA	GulN	11788788	9920528	1 Carboxylic Acid,1 Primary Amine	2
GulA	GulNAc	11788788	13201633	1 Carboxylic Acid,1 Amide	2
GulA	Ido	11788788	11030410	1 Primary Alcohol,1 Carboxylic Acid	2
GulA	IdoA	11788788	441039		0
GulA	IdoN	11788788	91864695	1 Carboxylic Acid,1 Primary Amine	2
GulA	IdoNAc	11788788	13201636	1 Carboxylic Acid,1 Amide	2
GulA	Kdn	11788788	13991616	2 Primary Alcohol	2
GulA	Kdo	11788788	10857507	1 Primary Alcohol	1
GulA	Leg	11788788	70678967	1 Primary Alcohol,2 Primary Amine	3
GulA	LDmanHep	11788788	21120522	2 Primary Alcohol,1 Carboxylic Acid	3
GulA	Lyx	11788788	439240	1 Carboxylic Acid	1
GulA	Man	11788788	18950	1 Primary Alcohol,1 Carboxylic Acid	2
GulA	ManA	11788788	439630		0
GulA	ManN	11788788	440049	1 Carboxylic Acid,1 Primary Amine	2
GulA	ManNAc	11788788	439281	1 Carboxylic Acid,1 Amide	2
GulA	Mur	11788788	441038	1 Primary Alcohol,1 Primary Amine,1 Ether	3
GulA	MurNAc	11788788	5462244	1 Primary Alcohol,1 Amide,1 Ether	3
GulA	MurNGc	11788788	91810748	1 Amide,1 Ether	2
GulA	Neu	11788788	441037	1 Primary Alcohol,1 Primary Amine	2
GulA	Neu5Ac	11788788	439197	1 Primary Alcohol,1 Amide	2
GulA	Neu5Gc	11788788	440001	2 Primary Alcohol,1 Amide	3
GulA	Oli	11788788	10888063	1 Primary Alcohol,1 Carboxylic Acid	2
GulA	Par	11788788	12303783	1 Primary Alcohol,1 Carboxylic Acid	2
GulA	Pse	11788788	101137651	1 Primary Alcohol,2 Primary Amine	3
GulA	Psi	11788788	441036	1 Primary Alcohol,1 Carboxylic Acid	2
GulA	Qui	11788788	439746	1 Carboxylic Acid	1
GulA	QuiNAc	11788788	11954187	1 Primary Alcohol,1 Carboxylic Acid,1 Amide	3
GulA	Rha	11788788	25310	1 Carboxylic Acid	1
GulA	RhaNAc	11788788	91807222	1 Primary Alcohol,1 Carboxylic Acid,1 Amide	3
GulA	Rib	11788788	10975657	1 Carboxylic Acid	1
GulA	Sor	11788788	439192	1 Primary Alcohol,1 Carboxylic Acid	2
GulA	Tag	11788788	439312	1 Primary Alcohol,1 Carboxylic Acid	2
GulA	Tal	11788788	441035	1 Primary Alcohol,1 Carboxylic Acid	2
GulA	TalA	11788788	11298488		0
GulA	TalN	11788788	9834117	1 Carboxylic Acid,1 Primary Amine	2
GulA	TalNAc	11788788	57376616	1 Carboxylic Acid,1 Amide	2
GulA	Tyv	11788788	12303782	1 Primary Alcohol,1 Carboxylic Acid	2
GulA	Xyl	11788788	135191	1 Carboxylic Acid	1
GulN	GulNAc	9920528	13201633	1 Primary Amine,1 Amide	2
[truncated: 702 more rows]
