# Supplementary material for: A consensus-based and readable extension of Li near Co de for R eaction R ules (LiCoRR)
Source: publisher site journal article supplement (doi:10.3762/bjoc.16.215), 2020-10-27
Supplement: Additional file 1 [file Table S7 - Lectin Binding Event.xlsx]

## Sheet: Sheet1
Agent	Lectin	Target	SNFG	Ref
Haemophilus influenzae 33391	N/S	GalNAc(b1-4)Gal		PMID3413084
Haemophilus influenzae 9795	N/S	GalNAc(b1-4)Gal		PMID3413084
Haemophilus influenzae N/S	HifE	NeuAc(a2-3)Gal(b1-3)GalNAc(b1-4)Gal(b1-4)Glc(b1-1)		PMID12640357
Haemophilus influenzae N/S	N/S	Gal(b1-3)GalNAc(b1-4)Gal(b1-4)Glc(b1-1)		PMID3413084
Haemophilus influenzae N/S	N/S	GalNAc(b1-4)Gal(b1-4)Glc(b1-1)		PMID3413084
Haemophilus influenzae N/S	N/S	NeuAc(a2-3)[Gal(b1-4)]GlcNAc(b1-3)Gal(b1-4)GlcNAc		Glyconnect Ref: 124
